# Supplementary material
Source: ML conference proceedings conference paper supplement (https://proceedings.neurips.cc/paper_files/paper/2021/hash/0e9b734aa25ca8096cb7b56dc0dd8929-Abstract.html)
Supplement: Supplementary file 1 [file 0e9b734aa25ca8096cb7b56dc0dd8929-Supplemental.zip]

Archive with 1,830 entries (1,586 files):
- l2e.mp4
- __MACOSX/._l2e.mp4
- l2e_supplementary.pdf
- __MACOSX/._l2e_supplementary.pdf
- l2e/
- __MACOSX/._l2e
- l2e/.DS_Store
- __MACOSX/l2e/._.DS_Store
- l2e/.gitmodules
- l2e/README.md
- l2e/l2e/
- l2e/.gitignore
- l2e/rai-python/
- l2e/gym-obstacles/
- l2e/stable-baselines3/
- l2e/gym-physx/
- l2e/l2e/993.py
- l2e/l2e/config_plan_obstacle.json
- l2e/l2e/config_subgoals_obstacle.json
- l2e/l2e/config_her_ep_10_basic.json
- l2e/l2e/config_her_2dmaze.json
- l2e/l2e/config_l2e_10_1000_basic.json
- l2e/l2e/plot_results.json
- l2e/l2e/997.py
- l2e/l2e/config_l2e_10_10000_basic.json
- l2e/l2e/train.sh
- l2e/l2e/config_l2e_100_1000_obstacle.json
- l2e/l2e/996.py
- l2e/l2e/config_l2e_1000_basic.json
- l2e/l2e/models.py
- l2e/l2e/imitation_data.sh
- l2e/l2e/992.py
- l2e/l2e/009.py
- l2e/l2e/config_her_fu_5_basic.json
- l2e/l2e/012.py
- l2e/l2e/config_subgoals_basic.json
- l2e/l2e/evaluate.sh
- l2e/l2e/config_l2e_10_1000_obstacle.json
- l2e/l2e/config_l2e_10_1000_basic_low_density.json
- l2e/l2e/config_l2e_1_1000_basic.json
- l2e/l2e/config_her_ep_1_basic.json
- l2e/l2e/config_im_plan_basic.json
- l2e/l2e/010.py
- l2e/l2e/config_her_fu_10_basic.json
- l2e/l2e/imitation_learning.sh
- l2e/l2e/config_l2e_10_1000_basic_very_low_density.json
- l2e/l2e/011.py
- l2e/l2e/config_her_fu_1_basic.json
- l2e/l2e/config_l2e_10_1000_basic_vae_encoding.json
- l2e/l2e/config_l2e_10_1000_basic_no_encoding.json
- l2e/l2e/config_im_plan_obstacle_evaluation.json
- l2e/l2e/config_im_plan_obstacle_training.json
- l2e/l2e/config_l2e_2dmaze.json
- l2e/l2e/995.py
- l2e/l2e/config_her_ep_5_obstacle.json
- l2e/l2e/plot_results.py
- l2e/l2e/config_l2e_10_100_basic.json
- l2e/l2e/config_her_fi_5_basic.json
- l2e/l2e/config_l2e_100_1000_basic.json
- l2e/l2e/config_her_ep_5_basic.json
- l2e/l2e/config_plan_basic.json
- l2e/l2e/config_her_fu_5_obstacle.json
- l2e/rai-python/setupPython.sh
- l2e/rai-python/submodule/
- l2e/rai-python/CMakeLists.txt
- l2e/rai-python/pytest.ini
- l2e/rai-python/LICENSE
- l2e/rai-python/test/
- l2e/rai-python/pybind11/
- l2e/rai-python/Dockerfile
- l2e/rai-python/Makefile
- l2e/rai-python/models/
- l2e/rai-python/docs/
- l2e/rai-python/.gitmodules
- l2e/rai-python/rai/
- l2e/rai-python/README.md
- l2e/rai-python/config.mk
- l2e/rai-python/.gitignore
- l2e/rai-python/rai-robotModels/
- l2e/rai-python/pytest_tests/
- l2e/rai-python/.github/
- l2e/rai-python/retired/
- l2e/rai-python/.git
- l2e/gym-obstacles/LICENSE
- l2e/gym-obstacles/README.md
- l2e/gym-obstacles/setup.py
- l2e/gym-obstacles/.gitignore
- l2e/gym-obstacles/scripts/
- l2e/gym-obstacles/.git
- l2e/gym-obstacles/gym_obstacles/
- l2e/stable-baselines3/LICENSE
- l2e/stable-baselines3/Dockerfile
- l2e/stable-baselines3/Makefile
- l2e/stable-baselines3/tests/
- l2e/stable-baselines3/.coveragerc
- l2e/stable-baselines3/docs/
- l2e/stable-baselines3/.readthedocs.yml
- l2e/stable-baselines3/NOTICE
- l2e/stable-baselines3/README.md
- l2e/stable-baselines3/setup.py
- l2e/stable-baselines3/.dockerignore
- l2e/stable-baselines3/.gitignore
- l2e/stable-baselines3/CONTRIBUTING.md
- l2e/stable-baselines3/scripts/
- l2e/stable-baselines3/.github/
- l2e/stable-baselines3/setup.cfg
- l2e/stable-baselines3/.gitlab-ci.yml
- l2e/stable-baselines3/.git
- l2e/stable-baselines3/stable_baselines3/
- l2e/gym-physx/LICENSE
- l2e/gym-physx/figs/
- l2e/gym-physx/tests/
- l2e/gym-physx/README.md
- l2e/gym-physx/gym_physx/
- l2e/gym-physx/setup.py
- l2e/gym-physx/.gitignore
- l2e/gym-physx/.github/
- l2e/gym-physx/.git
- l2e/rai-python/submodule/.git/
- l2e/rai-python/test/rai.cfg
- l2e/rai-python/test/basics.py
- l2e/rai-python/test/retired/
- l2e/rai-python/test/kitchen.g
- l2e/rai-python/pybind11/tools/
- l2e/rai-python/pybind11/CMakeLists.txt
- l2e/rai-python/pybind11/LICENSE
- l2e/rai-python/pybind11/pybind11/
- l2e/rai-python/pybind11/include/
- l2e/rai-python/pybind11/tests/
- l2e/rai-python/pybind11/MANIFEST.in
- l2e/rai-python/pybind11/docs/
- l2e/rai-python/pybind11/.readthedocs.yml
- l2e/rai-python/pybind11/.appveyor.yml
- l2e/rai-python/pybind11/.gitmodules
- l2e/rai-python/pybind11/README.md
- l2e/rai-python/pybind11/ISSUE_TEMPLATE.md
- l2e/rai-python/pybind11/setup.py
- l2e/rai-python/pybind11/.gitignore
- l2e/rai-python/pybind11/CONTRIBUTING.md
- l2e/rai-python/pybind11/setup.cfg
- l2e/rai-python/pybind11/.git
- l2e/rai-python/pybind11/.travis.yml
- l2e/rai-python/models/RSSproblem-shared.g
- l2e/rai-python/models/RSSfol.g
- l2e/rai-python/models/RSSproblem-05.g
- l2e/rai-python/models/RSSproblem-01.g
- l2e/rai-python/models/fol-pickAndPlace.g
- l2e/rai-python/models/tables.g
- l2e/rai-python/models/keywords.g
- l2e/rai-python/docs/6-KOMO-skeleton.ipynb
- l2e/rai-python/docs/1-basics.ipynb
- l2e/rai-python/docs/6-KOMO-physics.ipynb
- l2e/rai-python/docs/sim1-physics.ipynb
- l2e/rai-python/docs/9-robotModels.ipynb
- l2e/rai-python/docs/3-IK-optimization.ipynb
- l2e/rai-python/docs/2-features.ipynb
- l2e/rai-python/docs/lgp1-pickAndPlace.ipynb
- l2e/rai-python/docs/broken-6-KOMO-physics.ipynb
- l2e/rai-python/docs/README.md
- l2e/rai-python/docs/rai.cfg
- l2e/rai-python/docs/.gitignore
- l2e/rai-python/docs/4-path-optimization.ipynb
- l2e/rai-python/docs/retired/
- l2e/rai-python/docs/5-cgo-optimization.ipynb
- l2e/rai-python/docs/broken-6-KOMO-skeleton.ipynb
- l2e/rai-python/rai/LICENSE
- l2e/rai-python/rai/test/
- l2e/rai-python/rai/bin/
- l2e/rai-python/rai/Makefile
- l2e/rai-python/rai/rai/
- l2e/rai-python/rai/README.md
- l2e/rai-python/rai/.gitignore
- l2e/rai-python/rai/lib/
- l2e/rai-python/rai/build/
- l2e/rai-python/rai/.git
- l2e/rai-python/rai-robotModels/baxter/
- l2e/rai-python/rai-robotModels/panda/
- l2e/rai-python/rai-robotModels/objects/
- l2e/rai-python/rai-robotModels/bremenKitchen/
- l2e/rai-python/rai-robotModels/README.md
- l2e/rai-python/rai-robotModels/human_simple/
- l2e/rai-python/rai-robotModels/.gitignore
- l2e/rai-python/rai-robotModels/pr2/
- l2e/rai-python/rai-robotModels/hubo/
- l2e/rai-python/rai-robotModels/.git
- l2e/rai-python/rai-robotModels/kuka_drake/
- l2e/rai-python/pytest_tests/test_libry.py
- l2e/rai-python/pytest_tests/z.push.g
- l2e/rai-python/.github/workflows/
- l2e/rai-python/retired/src/
- l2e/gym-obstacles/scripts/1_example.png
- l2e/gym-obstacles/scripts/playground.py
- l2e/gym-obstacles/scripts/2_example.png
- l2e/gym-obstacles/scripts/plots.py
- l2e/gym-obstacles/scripts/0_example.png
- l2e/gym-obstacles/gym_obstacles/__init__.py
- l2e/gym-obstacles/gym_obstacles/planners/
- l2e/gym-obstacles/gym_obstacles/envs/
- l2e/stable-baselines3/tests/test_deterministic.py
- l2e/stable-baselines3/tests/test_monitor.py
- l2e/stable-baselines3/tests/test_utils.py
- l2e/stable-baselines3/tests/test_vec_envs.py
- l2e/stable-baselines3/tests/test_callbacks.py
- l2e/stable-baselines3/tests/test_envs.py
- l2e/stable-baselines3/tests/test_cnn.py
- l2e/stable-baselines3/tests/test_sde.py
- l2e/stable-baselines3/tests/test_run.py
- l2e/stable-baselines3/tests/__init__.py
- l2e/stable-baselines3/tests/test_env_checker.py
- l2e/stable-baselines3/tests/test_predict.py
- l2e/stable-baselines3/tests/test_her.py
- l2e/stable-baselines3/tests/test_save_load.py
- l2e/stable-baselines3/tests/test_vec_check_nan.py
- l2e/stable-baselines3/tests/test_vec_normalize.py
- l2e/stable-baselines3/tests/test_custom_policy.py
- l2e/stable-baselines3/tests/test_tensorboard.py
- l2e/stable-baselines3/tests/test_identity.py
- l2e/stable-baselines3/tests/test_distributions.py
- l2e/stable-baselines3/tests/test_logger.py
- l2e/stable-baselines3/tests/test_spaces.py
- l2e/stable-baselines3/docs/guide/
- l2e/stable-baselines3/docs/misc/
- l2e/stable-baselines3/docs/index.rst
- l2e/stable-baselines3/docs/Makefile
- l2e/stable-baselines3/docs/conf.py
- l2e/stable-baselines3/docs/_static/
- l2e/stable-baselines3/docs/spelling_wordlist.txt
- l2e/stable-baselines3/docs/README.md
- l2e/stable-baselines3/docs/common/
- l2e/stable-baselines3/docs/make.bat
- l2e/stable-baselines3/docs/conda_env.yml
- l2e/stable-baselines3/docs/modules/
- l2e/stable-baselines3/scripts/build_docker.sh
- l2e/stable-baselines3/scripts/run_docker_cpu.sh
- l2e/stable-baselines3/scripts/run_tests.sh
- l2e/stable-baselines3/scripts/run_docker_gpu.sh
- l2e/stable-baselines3/.github/workflows/
- l2e/stable-baselines3/.github/PULL_REQUEST_TEMPLATE.md
- l2e/stable-baselines3/.github/ISSUE_TEMPLATE/
- l2e/stable-baselines3/stable_baselines3/sac/
- l2e/stable-baselines3/stable_baselines3/ddpg/
- l2e/stable-baselines3/stable_baselines3/__init__.py
- l2e/stable-baselines3/stable_baselines3/common/
- l2e/stable-baselines3/stable_baselines3/dqn/
- l2e/stable-baselines3/stable_baselines3/her/
- l2e/stable-baselines3/stable_baselines3/py.typed
- l2e/stable-baselines3/stable_baselines3/ppo/
- l2e/stable-baselines3/stable_baselines3/version.txt
- l2e/stable-baselines3/stable_baselines3/a2c/
- l2e/stable-baselines3/stable_baselines3/td3/
- l2e/gym-physx/figs/banner.png
- l2e/gym-physx/tests/fixed_reset.json
- l2e/gym-physx/tests/test_plans/
- l2e/gym-physx/tests/test_encoders.py
- l2e/gym-physx/tests/expected_rewards.json
- l2e/gym-physx/tests/expected_observations_obstacle.json
- l2e/gym-physx/tests/test_box_env.py
- l2e/gym-physx/tests/test_wrappers.py
- l2e/gym-physx/tests/visualize_komo.py
- l2e/gym-physx/gym_physx/wrappers/
- l2e/gym-physx/gym_physx/__init__.py
- l2e/gym-physx/gym_physx/encoders/
- l2e/gym-physx/gym_physx/generators/
- l2e/gym-physx/gym_physx/envs/
- l2e/gym-physx/.github/workflows/
- l2e/rai-python/submodule/.git/config
- l2e/rai-python/submodule/.git/objects/
- l2e/rai-python/submodule/.git/HEAD
- l2e/rai-python/submodule/.git/info/
- l2e/rai-python/submodule/.git/description
- l2e/rai-python/submodule/.git/hooks/
- l2e/rai-python/submodule/.git/refs/
- l2e/rai-python/test/retired/lgp-example.py
- l2e/rai-python/test/retired/Makefile
- l2e/rai-python/test/retired/fol.g
- l2e/rai-python/test/retired/pick_and_place_CGO.py
- l2e/rai-python/test/retired/boxProblem.g
- l2e/rai-python/test/retired/keywords.g
- l2e/rai-python/test/retired/main.cpp
- l2e/rai-python/test/retired/lgp-example.g
- l2e/rai-python/pybind11/tools/check-style.sh
- l2e/rai-python/pybind11/tools/mkdoc.py
- l2e/rai-python/pybind11/tools/clang/
- l2e/rai-python/pybind11/tools/FindEigen3.cmake
- l2e/rai-python/pybind11/tools/libsize.py
- l2e/rai-python/pybind11/tools/pybind11Tools.cmake
- l2e/rai-python/pybind11/tools/FindCatch.cmake
- l2e/rai-python/pybind11/tools/FindPythonLibsNew.cmake
- l2e/rai-python/pybind11/tools/pybind11Config.cmake.in
- l2e/rai-python/pybind11/pybind11/_version.py
- l2e/rai-python/pybind11/pybind11/__init__.py
- l2e/rai-python/pybind11/pybind11/__main__.py
- l2e/rai-python/pybind11/include/pybind11/
- l2e/rai-python/pybind11/tests/test_pickling.cpp
- l2e/rai-python/pybind11/tests/test_stl_binders.py
- l2e/rai-python/pybind11/tests/test_methods_and_attributes.py
- l2e/rai-python/pybind11/tests/test_async.cpp
- l2e/rai-python/pybind11/tests/test_methods_and_attributes.cpp
- l2e/rai-python/pybind11/tests/test_sequences_and_iterators.py
- l2e/rai-python/pybind11/tests/test_numpy_vectorize.py
[truncated: 1,530 more entries]
