# Supplementary material
Source: ML conference proceedings conference paper supplement (https://proceedings.neurips.cc/paper_files/paper/2021/hash/0e9b734aa25ca8096cb7b56dc0dd8929-Abstract.html)
Supplement: Supplementary file 1 [file 0e9b734aa25ca8096cb7b56dc0dd8929-Supplemental.zip › l2e/gym-obstacles/scripts/plots.py]

# %%
"""
Visualize environment for README
"""
import gym
import matplotlib.pyplot as plt

env = gym.make(
    'gym_obstacles:obstacles-v0',
    plan_or_goal='plan',
    plan_length=20,
    n_boxes=3,
    planner_tolerance=0.05
)

for ind in range(3):
    env.reset()
    env.render()
    plt.savefig(str(ind) + "_example.png")
    plt.show()

# %%
