# Supplementary material
Source: ML conference proceedings conference paper supplement (https://proceedings.neurips.cc/paper_files/paper/2021/hash/0e9b734aa25ca8096cb7b56dc0dd8929-Abstract.html)
Supplement: Supplementary file 1 [file 0e9b734aa25ca8096cb7b56dc0dd8929-Supplemental.zip › l2e/gym-physx/gym_physx/__init__.py]

"""
OpenAI-Gym Wrapper for PhysX-based Robotic Pushing Environment
"""
from gym.envs.registration import register
from .envs import shaping

register(
    id='physx-pushing-v0',
    entry_point='gym_physx.envs:PhysxPushingEnv',
)
