# Supplementary material
Source: ML conference proceedings conference paper supplement (https://proceedings.neurips.cc/paper_files/paper/2021/hash/0e9b734aa25ca8096cb7b56dc0dd8929-Abstract.html)
Supplement: Supplementary file 1 [file 0e9b734aa25ca8096cb7b56dc0dd8929-Supplemental.zip › l2e/gym-physx/tests/expected_observations_obstacle.json]

[[0.0, 0.9900000000000011, 0.14, -0.001358799752779305, 0.4986925423145294, 0.6450172662734985, 0.9999568235531726, 0.006476022542213588, -0.0066642423758315845, 5.919320520027415e-06], [0.0, 0.9800000000000022, 0.14, -0.001358799752779305, 0.4986925423145294, 0.6450172662734985, 0.9999568235531726, 0.006476022542213588, -0.0066642423758315845, 5.919320520027415e-06], [0.0, 0.9700000000000033, 0.14, -0.001358799752779305, 0.4986925423145294, 0.6450172662734985, 0.9999568235531726, 0.006476022542213588, -0.0066642423758315845, 5.919320520027415e-06], [0.0, 0.9600000000000044, 0.14, -0.001358799752779305, 0.4986925423145294, 0.6450172662734985, 0.9999568235531726, 0.006476022542213588, -0.0066642423758315845, 5.919320520027415e-06], [0.0, 0.9500000000000055, 0.14, -0.001358799752779305, 0.4986925423145294, 0.6450172662734985, 0.9999568235531726, 0.006476022542213588, -0.0066642423758315845, 5.919320520027415e-06], [0.0, 0.9400000000000066, 0.14, -0.001358799752779305, 0.4986925423145294, 0.6450172662734985, 0.9999568235531726, 0.006476022542213588, -0.0066642423758315845, 5.919320520027415e-06], [0.0, 0.9300000000000077, 0.14, -0.001358799752779305, 0.4986925423145294, 0.6450172662734985, 0.9999568235531726, 0.006476022542213588, -0.0066642423758315845, 5.919320520027415e-06], [0.0, 0.9200000000000088, 0.14, -0.001358799752779305, 0.4986925423145294, 0.6450172662734985, 0.9999568235531726, 0.006476022542213588, -0.0066642423758315845, 5.919320520027415e-06], [0.0, 0.9100000000000099, 0.14, -0.001358799752779305, 0.4986925423145294, 0.6450172662734985, 0.9999568235531726, 0.006476022542213588, -0.0066642423758315845, 5.919320520027415e-06], [0.0, 0.900000000000011, 0.14, -0.001358799752779305, 0.4986925423145294, 0.6450172662734985, 0.9999568235531726, 0.006476022542213588, -0.0066642423758315845, 5.919320520027415e-06], [0.0, 0.8900000000000121, 0.14, -0.001358799752779305, 0.4986925423145294, 0.6450172662734985, 0.9999568235531726, 0.006476022542213588, -0.0066642423758315845, 5.919320520027415e-06], [0.0, 0.8800000000000132, 0.14, -0.001358799752779305, 0.4986925423145294, 0.6450172662734985, 0.9999568235531726, 0.006476022542213588, -0.0066642423758315845, 5.919320520027415e-06], [0.0, 0.8700000000000143, 0.14, -0.001358799752779305, 0.4986925423145294, 0.6450172662734985, 0.9999568235531726, 0.006476022542213588, -0.0066642423758315845, 5.919320520027415e-06], [0.0, 0.8600000000000154, 0.14, -0.001358799752779305, 0.4986925423145294, 0.6450172662734985, 0.9999568235531726, 0.006476022542213588, -0.0066642423758315845, 5.919320520027415e-06], [0.0, 0.8500000000000165, 0.14, -0.001358799752779305, 0.4986925423145294, 0.6450172662734985, 0.9999568235531726, 0.006476022542213588, -0.0066642423758315845, 5.919320520027415e-06], [0.0, 0.8400000000000176, 0.14, -0.001358799752779305, 0.4986925423145294, 0.6450172662734985, 0.9999568235531726, 0.006476022542213588, -0.0066642423758315845, 5.919320520027415e-06], [0.0, 0.8300000000000187, 0.14, -0.001358799752779305, 0.4986925423145294, 0.6450172662734985, 0.9999568235531726, 0.006476022542213588, -0.0066642423758315845, 5.919320520027415e-06], [0.0, 0.8200000000000198, 0.14, -0.001358799752779305, 0.4986925423145294, 0.6450172662734985, 0.9999568235531726, 0.006476022542213588, -0.0066642423758315845, 5.919320520027415e-06], [0.0, 0.8100000000000209, 0.14, -0.001358799752779305, 0.4986925423145294, 0.6450172662734985, 0.9999568235531726, 0.006476022542213588, -0.0066642423758315845, 5.919320520027415e-06], [0.0, 0.800000000000022, 0.14, -0.001358799752779305, 0.4986925423145294, 0.6450172662734985, 0.9999568235531726, 0.006476022542213588, -0.0066642423758315845, 5.919320520027415e-06], [0.0, 0.7900000000000231, 0.14, -0.0013228575699031353, 0.4986732006072998, 0.6450179219245911, 0.9999577847467443, 0.006553280999221108, -0.006440734858737219, 1.2923169183079384e-05], [0.0, 0.7800000000000242, 0.14, -0.001322859083302319, 0.49867314100265503, 0.6450179219245911, 0.999957785248845, 0.006553230786135166, -0.006440707935365957, 1.2952973467913186e-05], [0.0, 0.7700000000000253, 0.14, -0.0013228625757619739, 0.49867314100265503, 0.6450179219245911, 0.9999577851975989, 0.006553233114105587, -0.006440713522970914, 1.2952973467249368e-05], [0.0, 0.7600000000000264, 0.14, -0.001322865835390985, 0.49867314100265503, 0.6450179219245911, 0.9999577853182426, 0.006553227061299941, -0.006440700950894154, 1.2952972559317495e-05], [0.0, 0.7500000000000275, 0.14, -0.0021548965014517307, 0.4934980571269989, 0.6452598571777344, 0.9999173201279384, 0.009471542123981299, -0.008676739338152556, 0.0005974884212201239], [0.0, 0.7400000000000286, 0.14, -0.0025863852351903915, 0.4835001826286316, 0.6451511383056641, 0.9999153430065317, 0.009644425871556431, -0.008730793731594768, -0.0002551676985257842], [0.0, 0.7300000000000297, 0.14, -0.003004970494657755, 0.4735063910484314, 0.6451546549797058, 0.9999141984798663, 0.009678488302671158, -0.0087411345115945, -0.0012308980429264727], [0.0, 0.7200000000000308, 0.14, -0.0035154446959495544, 0.4635106921195984, 0.6451690793037415, 0.9999115820979643, 0.009783595563480475, -0.008779333691785442, -0.002008119549402471], [0.0, 0.7100000000000319, 0.14, -0.004035295452922583, 0.4535156190395355, 0.6451494693756104, 0.999910585499956, 0.009703477771494232, -0.00876182497397511, -0.0028096169487319407], [0.0, 0.700000000000033, 0.14, -0.004581867717206478, 0.4435220956802368, 0.6451588273048401, 0.9999068659081359, 0.009784653821318748, -0.008794118779117984, -0.0036309136955509276], [0.0, 0.6900000000000341, 0.14, -0.005138464272022247, 0.43352988362312317, 0.6451444029808044, 0.999903762814547, 0.009742575934522747, -0.008799649989019873, -0.004484805853203744], [0.0, 0.6800000000000352, 0.14, -0.0057069179601967335, 0.423539400100708, 0.6451472640037537, 0.9998989237591375, 0.009782915829416934, -0.008797117507922655, -0.005389577603594323], [0.0, 0.6700000000000363, 0.14, -0.006294865161180496, 0.4135502874851227, 0.6451308131217957, 0.9998939149192819, 0.009733188777180808, -0.008803514743958588, -0.006318391549460785], [0.0, 0.6600000000000374, 0.14, -0.006903774105012417, 0.403563529253006, 0.6451359987258911, 0.9998867842018463, 0.009770443985725265, -0.008825670287958116, -0.007284555359144653], [0.0, 0.6500000000000385, 0.14, -0.007524491287767887, 0.3935781717300415, 0.6451203227043152, 0.9998793348127786, 0.009723917913918537, -0.008833311800463834, -0.00829058727682353], [0.0, 0.6400000000000396, 0.14, -0.008158156648278236, 0.38359522819519043, 0.6451224088668823, 0.9998697170127084, 0.009756838096082358, -0.00882965803244067, -0.00934827525928525], [0.0, 0.6300000000000407, 0.14, -0.008813655003905296, 0.37361419200897217, 0.6451066136360168, 0.9998593411259156, 0.009709926400643455, -0.008838072490655288, -0.010435696775686107], [0.0, 0.6200000000000419, 0.14, -0.009493263438344002, 0.3636360466480255, 0.6451082825660706, 0.9998462918018884, 0.009746181316336958, -0.008868176069440459, -0.011565473313428415], [0.0, 0.610000000000043, 0.14, -0.010184498503804207, 0.35366004705429077, 0.645095944404602, 0.9998325145150163, 0.009697518699244782, -0.00887050616198312, -0.012736371935831705], [0.0, 0.600000000000044, 0.14, -0.010893270373344421, 0.34368696808815, 0.6450942754745483, 0.9998156839091833, 0.00973074807178516, -0.008875687844336079, -0.01396899840594009], [0.0, 0.5900000000000452, 0.14, -0.01162337139248848, 0.3337167203426361, 0.6450820565223694, 0.9997977434615625, 0.009681001485666155, -0.008877427559644683, -0.015229630964851554], [0.0, 0.5800000000000463, 0.14, -0.012382006272673607, 0.32374995946884155, 0.6450825333595276, 0.9997762952780678, 0.009711810657522421, -0.008910680514145116, -0.016542064761963706], [0.0, 0.5700000000000474, 0.14, -0.01315322145819664, 0.31378623843193054, 0.645071268081665, 0.9997533985543536, 0.00966504142107978, -0.00891324157489804, -0.01789645713475347], [0.0, 0.5600000000000485, 0.14, -0.013951905071735382, 0.3038259744644165, 0.6450693011283875, 0.9997269079779729, 0.009696541288801097, -0.008919887259264498, -0.019300833223422496], [0.0, 0.5500000000000496, 0.14, -0.01478318776935339, 0.29386985301971436, 0.645058810710907, 0.9996985267731333, 0.009666169840582921, -0.00894561030204579, -0.0207218914330683], [0.0, 0.5400000000000507, 0.14, -0.015644580125808716, 0.2839176058769226, 0.6450437307357788, 0.9996679713393641, 0.009599962907398844, -0.008950083240880384, -0.022173944177751214], [0.0, 0.5300000000000518, 0.14, -0.016532281413674355, 0.2739696800708771, 0.6450483202934265, 0.9996327934084172, 0.00966660788562483, -0.008960293763905752, -0.02367589850744304], [0.0, 0.5200000000000529, 0.14, -0.0174565352499485, 0.2640268802642822, 0.6450421214103699, 0.999595538691721, 0.009639915013048552, -0.008981077934141577, -0.025202605129035008], [0.0, 0.510000000000054, 0.14, -0.017996372655034065, 0.2542186677455902, 0.6448180079460144, 0.9998833210660913, 0.005475573667859589, -0.006261518578711861, -0.012812327342828741], [0.0, 0.5000000000000551, 0.14, -0.019835015758872032, 0.24814939498901367, 0.6439400315284729, 0.9999534709278988, 0.002781935962136317, -0.005825186624575944, 0.007168264248711844], [0.0, 0.49000000000005617, 0.14, -0.020438678562641144, 0.24710054695606232, 0.6423968076705933, 0.9999387304641599, -0.00225902149939105, -0.006361405942994272, 0.008772950131954557], [0.0, 0.48000000000005727, 0.14, -0.021012242883443832, 0.24611960351467133, 0.6408231854438782, 0.9999010272255124, -0.007149352949918402, -0.006512361855009544, 0.010218201839444113], [0.0, 0.47000000000005837, 0.14, -0.021933602169156075, 0.2449803352355957, 0.6382291316986084, 0.9998284404743515, -0.013701070793527833, -0.0040134479526286425, 0.011800953913495081], [0.0, 0.4600000000000595, 0.14, -0.02291155233979225, 0.24394835531711578, 0.6376955509185791, 0.9997293691765188, -0.01898450728062488, -0.002125118338743697, 0.013276323334334695], [0.0, 0.4500000000000606, 0.14, -0.02229047194123268, 0.246853306889534, 0.6348659992218018, 0.9996454719843384, -0.024552686150047305, 0.005903839136109936, 0.008440416309731393], [0.0, 0.4400000000000617, 0.14, -0.015154760330915451, 0.3531191051006317, 1.1134445667266846, 0.71033110722951, 0.6825332307996562, -0.16006249897147892, -0.06291345944459474], [0.0, 0.4300000000000628, 0.14, 0.11154209822416306, 0.5865917205810547, 0.7343591451644897, 0.23336816638634306, 0.956032723466406, -0.17439956827287156, 0.0335487878338196], [0.0, 0.4200000000000639, 0.14, 0.131388321518898, 0.5828310251235962, 0.7121050357818604, 0.24343555584607435, 0.9535524629866087, -0.173405632524095, -0.0375142251819722], [0.0, 0.410000000000065, 0.14, 0.13060279190540314, 0.5807453989982605, 0.7106578350067139, 0.2369343887369599, 0.9551803867867871, -0.17371135590298425, -0.03628896474182544], [0.0, 0.4000000000000661, 0.14, 0.12973786890506744, 0.5784446597099304, 0.7090083360671997, 0.22968409635964576, 0.9569418272411974, -0.17403490960304904, -0.03491998561267799], [0.0, 0.3900000000000672, 0.14, 0.12873750925064087, 0.5757681727409363, 0.7070227861404419, 0.2211313873364382, 0.9589485654608572, -0.17438307638236117, -0.03330316811731295], [0.0, 0.3800000000000683, 0.14, 0.12769722938537598, 0.5730391144752502, 0.7049053311347961, 0.21221676051007937, 0.9609390386698143, -0.17481259394824838, -0.03163490976793587], [0.0, 0.3700000000000694, 0.14, 0.12669426202774048, 0.5704131722450256, 0.7027887105941772, 0.20350232919351768, 0.9628005121909907, -0.17521974615712435, -0.030000271568970588], [0.0, 0.3600000000000705, 0.14, 0.12556369602680206, 0.5674083232879639, 0.7002724409103394, 0.193381185468203, 0.964869207191489, -0.17561745478581403, -0.028100528378169454], [0.0, 0.3500000000000716, 0.14, 0.12418045103549957, 0.563772439956665, 0.6970729827880859, 0.18085119310097963, 0.967266450118734, -0.17613926707016578, -0.02575692187819811], [0.0, 0.3400000000000727, 0.14, 0.12272864580154419, 0.5599084496498108, 0.6934843063354492, 0.16721861232325946, 0.9696965970906913, -0.17660295973350054, -0.023191375482800786], [0.0, 0.3300000000000738, 0.14, 0.12108557671308517, 0.5555400848388672, 0.6891790628433228, 0.1513369856774246, 0.972279268810889, -0.17709490988156285, -0.02018744908786359], [0.0, 0.3200000000000749, 0.14, 0.11946884542703629, 0.5512146949768066, 0.6846049427986145, 0.13506197270310136, 0.9746562246172956, -0.17751369972523715, -0.017099524968983964], [0.0, 0.310000000000076, 0.14, 0.11750461161136627, 0.5459991693496704, 0.6786336302757263, 0.11458412617078753, 0.9772350838638155, -0.17806178423430596, -0.013269133003110287], [0.0, 0.3000000000000771, 0.14, 0.11403432488441467, 0.5376207828521729, 0.6633984446525574, 0.06509173381315132, 0.9818744832870807, -0.1779588980375054, -0.004024409050137054], [0.0, 0.2900000000000782, 0.14, 0.11037084460258484, 0.5301302075386047, 0.6451097130775452, 0.006944625819172795, 0.9841169843386973, -0.17729810944250998, 0.005560008673706024], [0.0, 0.2800000000000793, 0.14, 0.11037084460258484, 0.5301302075386047, 0.6451097130775452, 0.006944627681763871, 0.9841169843310632, -0.1772981094411346, 0.00556000774234042], [0.0, 0.2700000000000804, 0.14, 0.11037084460258484, 0.5301302075386047, 0.6451097130775452, 0.006944621163054706, 0.9841169844087414, -0.1772981094551291, 0.0055600016891832], [0.0, 0.2600000000000815, 0.14, 0.11037084460258484, 0.5301302075386047, 0.6451097130775452, 0.006944632337917919, 0.9841169842661148, -0.17729810942943355, 0.005560013795569558], [0.0, 0.2500000000000826, 0.14, 0.11036306619644165, 0.5301394462585449, 0.6451095342636108, 0.006938711800172497, 0.9841165499035907, -0.17730099716819708, 0.005552196643740481], [0.0, 0.24000000000008231, 0.14, 0.11036306619644165, 0.5301394462585449, 0.6451095342636108, 0.006938707143748524, 0.9841165499302994, -0.177300997173009, 0.005552197575213624], [0.0, 0.23000000000008203, 0.14, 0.11036306619644165, 0.5301394462585449, 0.6451095342636108, 0.006938707143748524, 0.9841165499302994, -0.177300997173009, 0.005552197575213624], [0.0, 0.22000000000008174, 0.14, 0.11036306619644165, 0.5301394462585449, 0.6451095342636108, 0.006938707143748524, 0.9841165499302994, -0.177300997173009, 0.005552197575213624], [0.0, 0.21000000000008145, 0.14, 0.11036306619644165, 0.5301394462585449, 0.6451095342636108, 0.006938707143748524, 0.9841165499302994, -0.177300997173009, 0.005552197575213624], [0.0, 0.20000000000008117, 0.14, 0.11036306619644165, 0.5301394462585449, 0.6451095342636108, 0.006938707143748524, 0.9841165499302994, -0.177300997173009, 0.005552197575213624], [0.0, 0.19000000000008088, 0.14, 0.11036306619644165, 0.5301394462585449, 0.6451095342636108, 0.006938707143748524, 0.9841165499302994, -0.177300997173009, 0.005552197575213624], [0.0, 0.1800000000000806, 0.14, 0.11036306619644165, 0.5301394462585449, 0.6451095342636108, 0.006938707143748524, 0.9841165499302994, -0.177300997173009, 0.005552197575213624], [0.0, 0.1700000000000803, 0.14, 0.11036306619644165, 0.5301394462585449, 0.6451095342636108, 0.006938707143748524, 0.9841165499302994, -0.177300997173009, 0.005552197575213624], [0.0, 0.16000000000008002, 0.14, 0.11036306619644165, 0.5301394462585449, 0.6451095342636108, 0.006938707143748524, 0.9841165499302994, -0.177300997173009, 0.005552197575213624], [0.0, 0.15000000000007974, 0.14, 0.11036306619644165, 0.5301394462585449, 0.6451095342636108, 0.006938707143748524, 0.9841165499302994, -0.177300997173009, 0.005552197575213624], [0.0, 0.14000000000007945, 0.14, 0.11036306619644165, 0.5301394462585449, 0.6451095342636108, 0.006938707143748524, 0.9841165499302994, -0.177300997173009, 0.005552197575213624], [0.0, 0.13000000000007916, 0.14, 0.11036306619644165, 0.5301394462585449, 0.6451095342636108, 0.006938707143748524, 0.9841165499302994, -0.177300997173009, 0.005552197575213624], [0.0, 0.12000000000007888, 0.14, 0.11036306619644165, 0.5301394462585449, 0.6451095342636108, 0.006938707143748524, 0.9841165499302994, -0.177300997173009, 0.005552197575213624], [0.0, 0.11000000000007859, 0.14, 0.11036306619644165, 0.5301394462585449, 0.6451095342636108, 0.006938707143748524, 0.9841165499302994, -0.177300997173009, 0.005552197575213624], [0.0, 0.11000000000007859, 0.14, 0.11036306619644165, 0.5301394462585449, 0.6451095342636108, 0.006938707143748524, 0.9841165499302994, -0.177300997173009, 0.005552197575213624], [0.0, 0.11000000000007859, 0.14, 0.11036306619644165, 0.5301394462585449, 0.6451095342636108, 0.006938707143748524, 0.9841165499302994, -0.177300997173009, 0.005552197575213624], [0.0, 0.11000000000007859, 0.14, 0.11036306619644165, 0.5301394462585449, 0.6451095342636108, 0.006938707143748524, 0.9841165499302994, -0.177300997173009, 0.005552197575213624], [0.0, 0.11000000000007859, 0.14, 0.11036306619644165, 0.5301394462585449, 0.6451095342636108, 0.006938707143748524, 0.9841165499302994, -0.177300997173009, 0.005552197575213624], [0.0, 0.11000000000007859, 0.14, 0.11036306619644165, 0.5301394462585449, 0.6451095342636108, 0.006938707143748524, 0.9841165499302994, -0.177300997173009, 0.005552197575213624], [0.0, 0.11000000000007859, 0.14, 0.11036306619644165, 0.5301394462585449, 0.6451095342636108, 0.006938707143748524, 0.9841165499302994, -0.177300997173009, 0.005552197575213624], [0.0, 0.11000000000007859, 0.14, 0.11036306619644165, 0.5301394462585449, 0.6451095342636108, 0.006938707143748524, 0.9841165499302994, -0.177300997173009, 0.005552197575213624], [0.0, 0.11000000000007859, 0.14, 0.11036306619644165, 0.5301394462585449, 0.6451095342636108, 0.006938707143748524, 0.9841165499302994, -0.177300997173009, 0.005552197575213624], [0.0, 0.11000000000007859, 0.14, 0.11036306619644165, 0.5301394462585449, 0.6451095342636108, 0.006938707143748524, 0.9841165499302994, -0.177300997173009, 0.005552197575213624], [0.0, 0.11000000000007859, 0.14, 0.11036306619644165, 0.5301394462585449, 0.6451095342636108, 0.006938707143748524, 0.9841165499302994, -0.177300997173009, 0.005552197575213624], [0.0, 0.11000000000007859, 0.14, 0.11036306619644165, 0.5301394462585449, 0.6451095342636108, 0.006938707143748524, 0.9841165499302994, -0.177300997173009, 0.005552197575213624], [-0.01, 0.11000000000007859, 0.14, 0.11036306619644165, 0.5301394462585449, 0.6451095342636108, 0.006938707143748524, 0.9841165499302994, -0.177300997173009, 0.005552197575213624], [-0.01999999999999999, 0.11000000000007859, 0.14, 0.11036306619644165, 0.5301394462585449, 0.6451095342636108, 0.006938707143748524, 0.9841165499302994, -0.177300997173009, 0.005552197575213624], [-0.02999999999999993, 0.11000000000007859, 0.14, 0.11036306619644165, 0.5301394462585449, 0.6451095342636108, 0.006938707143748524, 0.9841165499302994, -0.177300997173009, 0.005552197575213624], [-0.03999999999999987, 0.11000000000007859, 0.14, 0.11036306619644165, 0.5301394462585449, 0.6451095342636108, 0.006938707143748524, 0.9841165499302994, -0.177300997173009, 0.005552197575213624], [-0.04999999999999981, 0.11000000000007859, 0.14, 0.11036306619644165, 0.5301394462585449, 0.6451095342636108, 0.006938707143748524, 0.9841165499302994, -0.177300997173009, 0.005552197575213624], [-0.05999999999999975, 0.11000000000007859, 0.14, 0.11036306619644165, 0.5301394462585449, 0.6451095342636108, 0.006938707143748524, 0.9841165499302994, -0.177300997173009, 0.005552197575213624], [-0.06999999999999995, 0.11000000000007859, 0.14, 0.11036306619644165, 0.5301394462585449, 0.6451095342636108, 0.006938707143748524, 0.9841165499302994, -0.177300997173009, 0.005552197575213624], [-0.08000000000000024, 0.11000000000007859, 0.14, 0.11036306619644165, 0.5301394462585449, 0.6451095342636108, 0.006938707143748524, 0.9841165499302994, -0.177300997173009, 0.005552197575213624], [-0.09000000000000052, 0.11000000000007859, 0.14, 0.11036306619644165, 0.5301394462585449, 0.6451095342636108, 0.006938707143748524, 0.9841165499302994, -0.177300997173009, 0.005552197575213624], [-0.10000000000000081, 0.11000000000007859, 0.14, 0.11036306619644165, 0.5301394462585449, 0.6451095342636108, 0.006938707143748524, 0.9841165499302994, -0.177300997173009, 0.005552197575213624], [-0.1100000000000011, 0.11000000000007859, 0.14, 0.11036306619644165, 0.5301394462585449, 0.6451095342636108, 0.006938707143748524, 0.9841165499302994, -0.177300997173009, 0.005552197575213624], [-0.12000000000000138, 0.11000000000007859, 0.14, 0.11036306619644165, 0.5301394462585449, 0.6451095342636108, 0.006938707143748524, 0.9841165499302994, -0.177300997173009, 0.005552197575213624], [-0.13000000000000167, 0.11000000000007859, 0.14, 0.11036306619644165, 0.5301394462585449, 0.6451095342636108, 0.006938707143748524, 0.9841165499302994, -0.177300997173009, 0.005552197575213624], [-0.14000000000000196, 0.11000000000007859, 0.14, 0.11036306619644165, 0.5301394462585449, 0.6451095342636108, 0.006938707143748524, 0.9841165499302994, -0.177300997173009, 0.005552197575213624], [-0.15000000000000224, 0.11000000000007859, 0.14, 0.11036306619644165, 0.5301394462585449, 0.6451095342636108, 0.006938707143748524, 0.9841165499302994, -0.177300997173009, 0.005552197575213624], [-0.16000000000000253, 0.11000000000007859, 0.14, 0.11036306619644165, 0.5301394462585449, 0.6451095342636108, 0.006938707143748524, 0.9841165499302994, -0.177300997173009, 0.005552197575213624], [-0.17000000000000282, 0.11000000000007859, 0.14, 0.11036306619644165, 0.5301394462585449, 0.6451095342636108, 0.006938707143748524, 0.9841165499302994, -0.177300997173009, 0.005552197575213624], [-0.1800000000000031, 0.11000000000007859, 0.14, 0.11036306619644165, 0.5301394462585449, 0.6451095342636108, 0.006938707143748524, 0.9841165499302994, -0.177300997173009, 0.005552197575213624], [-0.1900000000000034, 0.11000000000007859, 0.14, 0.11036306619644165, 0.5301394462585449, 0.6451095342636108, 0.006938707143748524, 0.9841165499302994, -0.177300997173009, 0.005552197575213624], [-0.20000000000000367, 0.11000000000007859, 0.14, 0.11036306619644165, 0.5301394462585449, 0.6451095342636108, 0.006938707143748524, 0.9841165499302994, -0.177300997173009, 0.005552197575213624], [-0.21000000000000396, 0.11000000000007859, 0.14, 0.11036306619644165, 0.5301394462585449, 0.6451095342636108, 0.006938707143748524, 0.9841165499302994, -0.177300997173009, 0.005552197575213624], [-0.22000000000000425, 0.11000000000007859, 0.14, 0.11036306619644165, 0.5301394462585449, 0.6451095342636108, 0.006938707143748524, 0.9841165499302994, -0.177300997173009, 0.005552197575213624], [-0.23000000000000453, 0.11000000000007859, 0.14, 0.11036306619644165, 0.5301394462585449, 0.6451095342636108, 0.006938707143748524, 0.9841165499302994, -0.177300997173009, 0.005552197575213624], [-0.24000000000000482, 0.11000000000007859, 0.14, 0.11036306619644165, 0.5301394462585449, 0.6451095342636108, 0.006938707143748524, 0.9841165499302994, -0.177300997173009, 0.005552197575213624], [-0.2500000000000051, 0.11000000000007859, 0.14, 0.11036306619644165, 0.5301394462585449, 0.6451095342636108, 0.006938707143748524, 0.9841165499302994, -0.177300997173009, 0.005552197575213624], [-0.260000000000004, 0.11000000000007859, 0.14, 0.11036306619644165, 0.5301394462585449, 0.6451095342636108, 0.006938707143748524, 0.9841165499302994, -0.177300997173009, 0.005552197575213624], [-0.2700000000000029, 0.11000000000007859, 0.14, 0.11036306619644165, 0.5301394462585449, 0.6451095342636108, 0.006938707143748524, 0.9841165499302994, -0.177300997173009, 0.005552197575213624], [-0.2800000000000018, 0.11000000000007859, 0.14, 0.11036306619644165, 0.5301394462585449, 0.6451095342636108, 0.006938707143748524, 0.9841165499302994, -0.177300997173009, 0.005552197575213624], [-0.2900000000000007, 0.11000000000007859, 0.14, 0.11036306619644165, 0.5301394462585449, 0.6451095342636108, 0.006938707143748524, 0.9841165499302994, -0.177300997173009, 0.005552197575213624], [-0.2999999999999996, 0.11000000000007859, 0.14, 0.11036306619644165, 0.5301394462585449, 0.6451095342636108, 0.006938707143748524, 0.9841165499302994, -0.177300997173009, 0.005552197575213624], [-0.3099999999999985, 0.11000000000007859, 0.14, 0.11036306619644165, 0.5301394462585449, 0.6451095342636108, 0.006938707143748524, 0.9841165499302994, -0.177300997173009, 0.005552197575213624], [-0.3199999999999974, 0.11000000000007859, 0.14, 0.11036306619644165, 0.5301394462585449, 0.6451095342636108, 0.006938707143748524, 0.9841165499302994, -0.177300997173009, 0.005552197575213624], [-0.3299999999999963, 0.11000000000007859, 0.14, 0.11036306619644165, 0.5301394462585449, 0.6451095342636108, 0.006938707143748524, 0.9841165499302994, -0.177300997173009, 0.005552197575213624], [-0.3399999999999952, 0.11000000000007859, 0.14, 0.11036306619644165, 0.5301394462585449, 0.6451095342636108, 0.006938707143748524, 0.9841165499302994, -0.177300997173009, 0.005552197575213624], [-0.3499999999999941, 0.11000000000007859, 0.14, 0.11036306619644165, 0.5301394462585449, 0.6451095342636108, 0.006938707143748524, 0.9841165499302994, -0.177300997173009, 0.005552197575213624], [-0.359999999999993, 0.11000000000007859, 0.14, 0.11036306619644165, 0.5301394462585449, 0.6451095342636108, 0.006938707143748524, 0.9841165499302994, -0.177300997173009, 0.005552197575213624], [-0.3699999999999919, 0.11000000000007859, 0.14, 0.11036306619644165, 0.5301394462585449, 0.6451095342636108, 0.006938707143748524, 0.9841165499302994, -0.177300997173009, 0.005552197575213624], [-0.3799999999999908, 0.11000000000007859, 0.14, 0.11036306619644165, 0.5301394462585449, 0.6451095342636108, 0.006938707143748524, 0.9841165499302994, -0.177300997173009, 0.005552197575213624], [-0.3899999999999897, 0.11000000000007859, 0.14, 0.11036306619644165, 0.5301394462585449, 0.6451095342636108, 0.006938707143748524, 0.9841165499302994, -0.177300997173009, 0.005552197575213624], [-0.3999999999999886, 0.11000000000007859, 0.14, 0.11036306619644165, 0.5301394462585449, 0.6451095342636108, 0.006938707143748524, 0.9841165499302994, -0.177300997173009, 0.005552197575213624], [-0.4099999999999875, 0.11000000000007859, 0.14, 0.11036306619644165, 0.5301394462585449, 0.6451095342636108, 0.006938707143748524, 0.9841165499302994, -0.177300997173009, 0.005552197575213624], [-0.4199999999999864, 0.11000000000007859, 0.14, 0.11036306619644165, 0.5301394462585449, 0.6451095342636108, 0.006938707143748524, 0.9841165499302994, -0.177300997173009, 0.005552197575213624], [-0.4299999999999853, 0.11000000000007859, 0.14, 0.11036306619644165, 0.5301394462585449, 0.6451095342636108, 0.006938707143748524, 0.9841165499302994, -0.177300997173009, 0.005552197575213624], [-0.4399999999999842, 0.11000000000007859, 0.14, 0.11036306619644165, 0.5301394462585449, 0.6451095342636108, 0.006938707143748524, 0.9841165499302994, -0.177300997173009, 0.005552197575213624], [-0.4499999999999831, 0.11000000000007859, 0.14, 0.11036306619644165, 0.5301394462585449, 0.6451095342636108, 0.006938707143748524, 0.9841165499302994, -0.177300997173009, 0.005552197575213624], [-0.459999999999982, 0.11000000000007859, 0.14, 0.11036306619644165, 0.5301394462585449, 0.6451095342636108, 0.006938707143748524, 0.9841165499302994, -0.177300997173009, 0.005552197575213624], [-0.4699999999999809, 0.11000000000007859, 0.14, 0.11036306619644165, 0.5301394462585449, 0.6451095342636108, 0.006938707143748524, 0.9841165499302994, -0.177300997173009, 0.005552197575213624], [-0.4799999999999798, 0.11000000000007859, 0.14, 0.11036306619644165, 0.5301394462585449, 0.6451095342636108, 0.006938707143748524, 0.9841165499302994, -0.177300997173009, 0.005552197575213624], [-0.4899999999999787, 0.11000000000007859, 0.14, 0.11036306619644165, 0.5301394462585449, 0.6451095342636108, 0.006938707143748524, 0.9841165499302994, -0.177300997173009, 0.005552197575213624], [-0.4999999999999776, 0.11000000000007859, 0.14, 0.11036306619644165, 0.5301394462585449, 0.6451095342636108, 0.006938707143748524, 0.9841165499302994, -0.177300997173009, 0.005552197575213624], [-0.5099999999999765, 0.11000000000007859, 0.14, 0.11036306619644165, 0.5301394462585449, 0.6451095342636108, 0.006938707143748524, 0.9841165499302994, -0.177300997173009, 0.005552197575213624], [-0.5199999999999754, 0.11000000000007859, 0.14, 0.11036306619644165, 0.5301394462585449, 0.6451095342636108, 0.006938707143748524, 0.9841165499302994, -0.177300997173009, 0.005552197575213624], [-0.5299999999999743, 0.11000000000007859, 0.14, 0.11036306619644165, 0.5301394462585449, 0.6451095342636108, 0.006938707143748524, 0.9841165499302994, -0.177300997173009, 0.005552197575213624], [-0.5399999999999732, 0.11000000000007859, 0.14, 0.11036306619644165, 0.5301394462585449, 0.6451095342636108, 0.006938707143748524, 0.9841165499302994, -0.177300997173009, 0.005552197575213624], [-0.5499999999999721, 0.11000000000007859, 0.14, 0.11036306619644165, 0.5301394462585449, 0.6451095342636108, 0.006938707143748524, 0.9841165499302994, -0.177300997173009, 0.005552197575213624], [-0.559999999999971, 0.11000000000007859, 0.14, 0.11036306619644165, 0.5301394462585449, 0.6451095342636108, 0.006938707143748524, 0.9841165499302994, -0.177300997173009, 0.005552197575213624], [-0.5699999999999699, 0.11000000000007859, 0.14, 0.11036306619644165, 0.5301394462585449, 0.6451095342636108, 0.006938707143748524, 0.9841165499302994, -0.177300997173009, 0.005552197575213624], [-0.5799999999999688, 0.11000000000007859, 0.14, 0.11036306619644165, 0.5301394462585449, 0.6451095342636108, 0.006938707143748524, 0.9841165499302994, -0.177300997173009, 0.005552197575213624], [-0.5899999999999677, 0.11000000000007859, 0.14, 0.11036306619644165, 0.5301394462585449, 0.6451095342636108, 0.006938707143748524, 0.9841165499302994, -0.177300997173009, 0.005552197575213624], [-0.5999999999999666, 0.11000000000007859, 0.14, 0.11036306619644165, 0.5301394462585449, 0.6451095342636108, 0.006938707143748524, 0.9841165499302994, -0.177300997173009, 0.005552197575213624], [-0.6099999999999655, 0.11000000000007859, 0.14, 0.11036306619644165, 0.5301394462585449, 0.6451095342636108, 0.006938707143748524, 0.9841165499302994, -0.177300997173009, 0.005552197575213624], [-0.6199999999999644, 0.11000000000007859, 0.14, 0.11036306619644165, 0.5301394462585449, 0.6451095342636108, 0.006938707143748524, 0.9841165499302994, -0.177300997173009, 0.005552197575213624], [-0.6299999999999633, 0.11000000000007859, 0.14, 0.11036306619644165, 0.5301394462585449, 0.6451095342636108, 0.006938707143748524, 0.9841165499302994, -0.177300997173009, 0.005552197575213624], [-0.6399999999999622, 0.11000000000007859, 0.14, 0.11036306619644165, 0.5301394462585449, 0.6451095342636108, 0.006938707143748524, 0.9841165499302994, -0.177300997173009, 0.005552197575213624], [-0.649999999999961, 0.11000000000007859, 0.14, 0.11036306619644165, 0.5301394462585449, 0.6451095342636108, 0.006938707143748524, 0.9841165499302994, -0.177300997173009, 0.005552197575213624], [-0.65999999999996, 0.11000000000007859, 0.14, 0.11036306619644165, 0.5301394462585449, 0.6451095342636108, 0.006938707143748524, 0.9841165499302994, -0.177300997173009, 0.005552197575213624], [-0.6699999999999589, 0.11000000000007859, 0.14, 0.11036306619644165, 0.5301394462585449, 0.6451095342636108, 0.006938707143748524, 0.9841165499302994, -0.177300997173009, 0.005552197575213624], [-0.6799999999999577, 0.11000000000007859, 0.14, 0.11036306619644165, 0.5301394462585449, 0.6451095342636108, 0.006938707143748524, 0.9841165499302994, -0.177300997173009, 0.005552197575213624], [-0.6899999999999566, 0.11000000000007859, 0.14, 0.11036306619644165, 0.5301394462585449, 0.6451095342636108, 0.006938707143748524, 0.9841165499302994, -0.177300997173009, 0.005552197575213624], [-0.6999999999999555, 0.11000000000007859, 0.14, 0.11036306619644165, 0.5301394462585449, 0.6451095342636108, 0.006938707143748524, 0.9841165499302994, -0.177300997173009, 0.005552197575213624], [-0.6999999999999555, 0.1000000000000783, 0.14, 0.11036306619644165, 0.5301394462585449, 0.6451095342636108, 0.006938707143748524, 0.9841165499302994, -0.177300997173009, 0.005552197575213624], [-0.6999999999999555, 0.09000000000007802, 0.14, 0.11036306619644165, 0.5301394462585449, 0.6451095342636108, 0.006938707143748524, 0.9841165499302994, -0.177300997173009, 0.005552197575213624], [-0.6999999999999555, 0.08000000000007773, 0.14, 0.11036306619644165, 0.5301394462585449, 0.6451095342636108, 0.006938707143748524, 0.9841165499302994, -0.177300997173009, 0.005552197575213624], [-0.6999999999999555, 0.07000000000007744, 0.14, 0.11036306619644165, 0.5301394462585449, 0.6451095342636108, 0.006938707143748524, 0.9841165499302994, -0.177300997173009, 0.005552197575213624], [-0.6999999999999555, 0.06000000000007725, 0.14, 0.11036306619644165, 0.5301394462585449, 0.6451095342636108, 0.006938707143748524, 0.9841165499302994, -0.177300997173009, 0.005552197575213624], [-0.6999999999999555, 0.05000000000007731, 0.14, 0.11036306619644165, 0.5301394462585449, 0.6451095342636108, 0.006938707143748524, 0.9841165499302994, -0.177300997173009, 0.005552197575213624], [-0.6999999999999555, 0.04000000000007737, 0.14, 0.11036306619644165, 0.5301394462585449, 0.6451095342636108, 0.006938707143748524, 0.9841165499302994, -0.177300997173009, 0.005552197575213624], [-0.6999999999999555, 0.03000000000007743, 0.14, 0.11036306619644165, 0.5301394462585449, 0.6451095342636108, 0.006938707143748524, 0.9841165499302994, -0.177300997173009, 0.005552197575213624], [-0.6999999999999555, 0.02000000000007749, 0.14, 0.11036306619644165, 0.5301394462585449, 0.6451095342636108, 0.006938707143748524, 0.9841165499302994, -0.177300997173009, 0.005552197575213624], [-0.6999999999999555, 0.0100000000000775, 0.14, 0.11036306619644165, 0.5301394462585449, 0.6451095342636108, 0.006938707143748524, 0.9841165499302994, -0.177300997173009, 0.005552197575213624], [-0.6899999999999566, 0.0100000000000775, 0.14, 0.11036306619644165, 0.5301394462585449, 0.6451095342636108, 0.006938707143748524, 0.9841165499302994, -0.177300997173009, 0.005552197575213624], [-0.6799999999999577, 0.0100000000000775, 0.14, 0.11036306619644165, 0.5301394462585449, 0.6451095342636108, 0.006938707143748524, 0.9841165499302994, -0.177300997173009, 0.005552197575213624], [-0.6699999999999589, 0.0100000000000775, 0.14, 0.11036306619644165, 0.5301394462585449, 0.6451095342636108, 0.006938707143748524, 0.9841165499302994, -0.177300997173009, 0.005552197575213624], [-0.65999999999996, 0.0100000000000775, 0.14, 0.11036306619644165, 0.5301394462585449, 0.6451095342636108, 0.006938707143748524, 0.9841165499302994, -0.177300997173009, 0.005552197575213624], [-0.649999999999961, 0.0100000000000775, 0.14, 0.11036306619644165, 0.5301394462585449, 0.6451095342636108, 0.006938707143748524, 0.9841165499302994, -0.177300997173009, 0.005552197575213624], [-0.6399999999999622, 0.0100000000000775, 0.14, 0.11036306619644165, 0.5301394462585449, 0.6451095342636108, 0.006938707143748524, 0.9841165499302994, -0.177300997173009, 0.005552197575213624], [-0.6299999999999633, 0.0100000000000775, 0.14, 0.11036306619644165, 0.5301394462585449, 0.6451095342636108, 0.006938707143748524, 0.9841165499302994, -0.177300997173009, 0.005552197575213624], [-0.6199999999999644, 0.0100000000000775, 0.14, 0.11036306619644165, 0.5301394462585449, 0.6451095342636108, 0.006938707143748524, 0.9841165499302994, -0.177300997173009, 0.005552197575213624], [-0.6099999999999655, 0.0100000000000775, 0.14, 0.11036306619644165, 0.5301394462585449, 0.6451095342636108, 0.006938707143748524, 0.9841165499302994, -0.177300997173009, 0.005552197575213624], [-0.5999999999999666, 0.0100000000000775, 0.14, 0.11036306619644165, 0.5301394462585449, 0.6451095342636108, 0.006938707143748524, 0.9841165499302994, -0.177300997173009, 0.005552197575213624], [-0.5899999999999677, 0.0100000000000775, 0.14, 0.11036306619644165, 0.5301394462585449, 0.6451095342636108, 0.006938707143748524, 0.9841165499302994, -0.177300997173009, 0.005552197575213624], [-0.5799999999999688, 0.0100000000000775, 0.14, 0.11036306619644165, 0.5301394462585449, 0.6451095342636108, 0.006938707143748524, 0.9841165499302994, -0.177300997173009, 0.005552197575213624], [-0.5699999999999699, 0.0100000000000775, 0.14, 0.11036306619644165, 0.5301394462585449, 0.6451095342636108, 0.006938707143748524, 0.9841165499302994, -0.177300997173009, 0.005552197575213624], [-0.5601999999999709, 0.0100000000000775, 0.14, 0.11036306619644165, 0.5301394462585449, 0.6451095342636108, 0.006938707143748524, 0.9841165499302994, -0.177300997173009, 0.005552197575213624], [-0.5601999999999709, 0.0100000000000775, 0.14, 0.11036306619644165, 0.5301394462585449, 0.6451095342636108, 0.006938707143748524, 0.9841165499302994, -0.177300997173009, 0.005552197575213624], [-0.5601999999999709, 0.0100000000000775, 0.14, 0.11036306619644165, 0.5301394462585449, 0.6451095342636108, 0.006938707143748524, 0.9841165499302994, -0.177300997173009, 0.005552197575213624], [-0.5601999999999709, 0.0100000000000775, 0.14, 0.11036306619644165, 0.5301394462585449, 0.6451095342636108, 0.006938707143748524, 0.9841165499302994, -0.177300997173009, 0.005552197575213624], [-0.5601999999999709, 0.0100000000000775, 0.14, 0.11036306619644165, 0.5301394462585449, 0.6451095342636108, 0.006938707143748524, 0.9841165499302994, -0.177300997173009, 0.005552197575213624], [-0.5601999999999709, 0.0100000000000775, 0.14, 0.11036306619644165, 0.5301394462585449, 0.6451095342636108, 0.006938707143748524, 0.9841165499302994, -0.177300997173009, 0.005552197575213624], [-0.5601999999999709, 0.0100000000000775, 0.14, 0.11036306619644165, 0.5301394462585449, 0.6451095342636108, 0.006938707143748524, 0.9841165499302994, -0.177300997173009, 0.005552197575213624], [-0.5601999999999709, 0.0100000000000775, 0.14, 0.11036306619644165, 0.5301394462585449, 0.6451095342636108, 0.006938707143748524, 0.9841165499302994, -0.177300997173009, 0.005552197575213624], [-0.5601999999999709, 0.0100000000000775, 0.14, 0.11036306619644165, 0.5301394462585449, 0.6451095342636108, 0.006938707143748524, 0.9841165499302994, -0.177300997173009, 0.005552197575213624], [-0.5601999999999709, 0.0100000000000775, 0.14, 0.11036306619644165, 0.5301394462585449, 0.6451095342636108, 0.006938707143748524, 0.9841165499302994, -0.177300997173009, 0.005552197575213624], [-0.5601999999999709, 0.0100000000000775, 0.14, 0.11036306619644165, 0.5301394462585449, 0.6451095342636108, 0.006938707143748524, 0.9841165499302994, -0.177300997173009, 0.005552197575213624], [-0.5601999999999709, 0.0100000000000775, 0.14, 0.11036306619644165, 0.5301394462585449, 0.6451095342636108, 0.006938707143748524, 0.9841165499302994, -0.177300997173009, 0.005552197575213624], [-0.5601999999999709, 0.0100000000000775, 0.14, 0.11036306619644165, 0.5301394462585449, 0.6451095342636108, 0.006938707143748524, 0.9841165499302994, -0.177300997173009, 0.005552197575213624], [-0.5601999999999709, 0.0100000000000775, 0.14, 0.11036306619644165, 0.5301394462585449, 0.6451095342636108, 0.006938707143748524, 0.9841165499302994, -0.177300997173009, 0.005552197575213624], [-0.5601999999999709, 0.0100000000000775, 0.14, 0.11036306619644165, 0.5301394462585449, 0.6451095342636108, 0.006938707143748524, 0.9841165499302994, -0.177300997173009, 0.005552197575213624], [-0.5601999999999709, 0.0100000000000775, 0.14, 0.11036306619644165, 0.5301394462585449, 0.6451095342636108, 0.006938707143748524, 0.9841165499302994, -0.177300997173009, 0.005552197575213624], [-0.5601999999999709, 0.0100000000000775, 0.14, 0.11036306619644165, 0.5301394462585449, 0.6451095342636108, 0.006938707143748524, 0.9841165499302994, -0.177300997173009, 0.005552197575213624], [-0.5601999999999709, 0.0100000000000775, 0.14, 0.11036306619644165, 0.5301394462585449, 0.6451095342636108, 0.006938707143748524, 0.9841165499302994, -0.177300997173009, 0.005552197575213624], [-0.5601999999999709, 0.0100000000000775, 0.14, 0.11036306619644165, 0.5301394462585449, 0.6451095342636108, 0.006938707143748524, 0.9841165499302994, -0.177300997173009, 0.005552197575213624], [-0.5601999999999709, 0.0100000000000775, 0.14, 0.11036306619644165, 0.5301394462585449, 0.6451095342636108, 0.006938707143748524, 0.9841165499302994, -0.177300997173009, 0.005552197575213624], [-0.5601999999999709, 0.0100000000000775, 0.14, 0.11036306619644165, 0.5301394462585449, 0.6451095342636108, 0.006938707143748524, 0.9841165499302994, -0.177300997173009, 0.005552197575213624], [-0.5601999999999709, 0.0100000000000775, 0.14, 0.11036306619644165, 0.5301394462585449, 0.6451095342636108, 0.006938707143748524, 0.9841165499302994, -0.177300997173009, 0.005552197575213624], [-0.5601999999999709, 0.0100000000000775, 0.14, 0.11036306619644165, 0.5301394462585449, 0.6451095342636108, 0.006938707143748524, 0.9841165499302994, -0.177300997173009, 0.005552197575213624], [-0.5601999999999709, 0.0100000000000775, 0.14, 0.11036306619644165, 0.5301394462585449, 0.6451095342636108, 0.006938707143748524, 0.9841165499302994, -0.177300997173009, 0.005552197575213624], [-0.5601999999999709, 0.0100000000000775, 0.14, 0.11036306619644165, 0.5301394462585449, 0.6451095342636108, 0.006938707143748524, 0.9841165499302994, -0.177300997173009, 0.005552197575213624], [-0.5601999999999709, 0.0100000000000775, 0.14, 0.11036306619644165, 0.5301394462585449, 0.6451095342636108, 0.006938707143748524, 0.9841165499302994, -0.177300997173009, 0.005552197575213624], [-0.5601999999999709, 0.0100000000000775, 0.14, 0.11036306619644165, 0.5301394462585449, 0.6451095342636108, 0.006938707143748524, 0.9841165499302994, -0.177300997173009, 0.005552197575213624], [-0.5601999999999709, 0.0100000000000775, 0.14, 0.11036306619644165, 0.5301394462585449, 0.6451095342636108, 0.006938707143748524, 0.9841165499302994, -0.177300997173009, 0.005552197575213624], [-0.5601999999999709, 0.0100000000000775, 0.14, 0.11036306619644165, 0.5301394462585449, 0.6451095342636108, 0.006938707143748524, 0.9841165499302994, -0.177300997173009, 0.005552197575213624], [-0.5601999999999709, 0.0100000000000775, 0.14, 0.11036306619644165, 0.5301394462585449, 0.6451095342636108, 0.006938707143748524, 0.9841165499302994, -0.177300997173009, 0.005552197575213624], [-0.5601999999999709, 0.0100000000000775, 0.14, 0.11036306619644165, 0.5301394462585449, 0.6451095342636108, 0.006938707143748524, 0.9841165499302994, -0.177300997173009, 0.005552197575213624], [-0.5601999999999709, 0.0100000000000775, 0.14, 0.11036306619644165, 0.5301394462585449, 0.6451095342636108, 0.006938707143748524, 0.9841165499302994, -0.177300997173009, 0.005552197575213624], [-0.5601999999999709, 0.0100000000000775, 0.14, 0.11036306619644165, 0.5301394462585449, 0.6451095342636108, 0.006938707143748524, 0.9841165499302994, -0.177300997173009, 0.005552197575213624], [-0.5601999999999709, 0.0100000000000775, 0.14, 0.11036306619644165, 0.5301394462585449, 0.6451095342636108, 0.006938707143748524, 0.9841165499302994, -0.177300997173009, 0.005552197575213624], [-0.5601999999999709, 0.0100000000000775, 0.14, 0.11036306619644165, 0.5301394462585449, 0.6451095342636108, 0.006938707143748524, 0.9841165499302994, -0.177300997173009, 0.005552197575213624], [-0.5601999999999709, 0.0100000000000775, 0.14, 0.11036306619644165, 0.5301394462585449, 0.6451095342636108, 0.006938707143748524, 0.9841165499302994, -0.177300997173009, 0.005552197575213624], [-0.5601999999999709, 0.0100000000000775, 0.14, 0.11036306619644165, 0.5301394462585449, 0.6451095342636108, 0.006938707143748524, 0.9841165499302994, -0.177300997173009, 0.005552197575213624], [-0.5601999999999709, 0.0100000000000775, 0.14, 0.11036306619644165, 0.5301394462585449, 0.6451095342636108, 0.006938707143748524, 0.9841165499302994, -0.177300997173009, 0.005552197575213624], [-0.5601999999999709, 0.0100000000000775, 0.14, 0.11036306619644165, 0.5301394462585449, 0.6451095342636108, 0.006938707143748524, 0.9841165499302994, -0.177300997173009, 0.005552197575213624], [-0.5601999999999709, 0.0100000000000775, 0.14, 0.11036306619644165, 0.5301394462585449, 0.6451095342636108, 0.006938707143748524, 0.9841165499302994, -0.177300997173009, 0.005552197575213624], [-0.5601999999999709, 0.0100000000000775, 0.14, 0.11036306619644165, 0.5301394462585449, 0.6451095342636108, 0.006938707143748524, 0.9841165499302994, -0.177300997173009, 0.005552197575213624], [-0.5601999999999709, 0.0100000000000775, 0.14, 0.11036306619644165, 0.5301394462585449, 0.6451095342636108, 0.006938707143748524, 0.9841165499302994, -0.177300997173009, 0.005552197575213624], [-0.5601999999999709, 0.0100000000000775, 0.14, 0.11036306619644165, 0.5301394462585449, 0.6451095342636108, 0.006938707143748524, 0.9841165499302994, -0.177300997173009, 0.005552197575213624], [-0.5601999999999709, 0.0100000000000775, 0.14, 0.11036306619644165, 0.5301394462585449, 0.6451095342636108, 0.006938707143748524, 0.9841165499302994, -0.177300997173009, 0.005552197575213624], [-0.5601999999999709, 0.0100000000000775, 0.14, 0.11036306619644165, 0.5301394462585449, 0.6451095342636108, 0.006938707143748524, 0.9841165499302994, -0.177300997173009, 0.005552197575213624], [-0.5601999999999709, 0.0100000000000775, 0.14, 0.11036306619644165, 0.5301394462585449, 0.6451095342636108, 0.006938707143748524, 0.9841165499302994, -0.177300997173009, 0.005552197575213624], [-0.5601999999999709, 0.0100000000000775, 0.14, 0.11036306619644165, 0.5301394462585449, 0.6451095342636108, 0.006938707143748524, 0.9841165499302994, -0.177300997173009, 0.005552197575213624], [-0.5601999999999709, 0.0100000000000775, 0.14, 0.11036306619644165, 0.5301394462585449, 0.6451095342636108, 0.006938707143748524, 0.9841165499302994, -0.177300997173009, 0.005552197575213624], [-0.5601999999999709, 0.0100000000000775, 0.14, 0.11036306619644165, 0.5301394462585449, 0.6451095342636108, 0.006938707143748524, 0.9841165499302994, -0.177300997173009, 0.005552197575213624], [-0.5601999999999709, 0.0100000000000775, 0.14, 0.11036306619644165, 0.5301394462585449, 0.6451095342636108, 0.006938707143748524, 0.9841165499302994, -0.177300997173009, 0.005552197575213624], [-0.5601999999999709, 0.0100000000000775, 0.14, 0.11036306619644165, 0.5301394462585449, 0.6451095342636108, 0.006938707143748524, 0.9841165499302994, -0.177300997173009, 0.005552197575213624], [-0.5601999999999709, 0.0100000000000775, 0.14, 0.11036306619644165, 0.5301394462585449, 0.6451095342636108, 0.006938707143748524, 0.9841165499302994, -0.177300997173009, 0.005552197575213624], [-0.5601999999999709, 0.0100000000000775, 0.14, 0.11036306619644165, 0.5301394462585449, 0.6451095342636108, 0.006938707143748524, 0.9841165499302994, -0.177300997173009, 0.005552197575213624], [-0.5601999999999709, 0.0100000000000775, 0.14, 0.11036306619644165, 0.5301394462585449, 0.6451095342636108, 0.006938707143748524, 0.9841165499302994, -0.177300997173009, 0.005552197575213624], [-0.5601999999999709, 0.0100000000000775, 0.14, 0.11036306619644165, 0.5301394462585449, 0.6451095342636108, 0.006938707143748524, 0.9841165499302994, -0.177300997173009, 0.005552197575213624], [-0.5601999999999709, 0.0100000000000775, 0.14, 0.11036306619644165, 0.5301394462585449, 0.6451095342636108, 0.006938707143748524, 0.9841165499302994, -0.177300997173009, 0.005552197575213624], [-0.5601999999999709, 0.0100000000000775, 0.14, 0.11036306619644165, 0.5301394462585449, 0.6451095342636108, 0.006938707143748524, 0.9841165499302994, -0.177300997173009, 0.005552197575213624], [-0.5601999999999709, 7.750099390371745e-14, 0.14, 0.11036306619644165, 0.5301394462585449, 0.6451095342636108, 0.006938707143748524, 0.9841165499302994, -0.177300997173009, 0.005552197575213624], [-0.5601999999999709, -0.0099999999999225, 0.14, 0.11036306619644165, 0.5301394462585449, 0.6451095342636108, 0.006938707143748524, 0.9841165499302994, -0.177300997173009, 0.005552197575213624], [-0.5601999999999709, -0.01999999999992249, 0.14, 0.11036306619644165, 0.5301394462585449, 0.6451095342636108, 0.006938707143748524, 0.9841165499302994, -0.177300997173009, 0.005552197575213624], [-0.5601999999999709, -0.02999999999992243, 0.14, 0.11036306619644165, 0.5301394462585449, 0.6451095342636108, 0.006938707143748524, 0.9841165499302994, -0.177300997173009, 0.005552197575213624], [-0.5601999999999709, -0.03999999999992237, 0.14, 0.11036306619644165, 0.5301394462585449, 0.6451095342636108, 0.006938707143748524, 0.9841165499302994, -0.177300997173009, 0.005552197575213624], [-0.5601999999999709, -0.04999999999992231, 0.14, 0.11036306619644165, 0.5301394462585449, 0.6451095342636108, 0.006938707143748524, 0.9841165499302994, -0.177300997173009, 0.005552197575213624], [-0.5601999999999709, -0.05999999999992225, 0.14, 0.11036306619644165, 0.5301394462585449, 0.6451095342636108, 0.006938707143748524, 0.9841165499302994, -0.177300997173009, 0.005552197575213624], [-0.5601999999999709, -0.06999999999992244, 0.14, 0.11036306619644165, 0.5301394462585449, 0.6451095342636108, 0.006938707143748524, 0.9841165499302994, -0.177300997173009, 0.005552197575213624], [-0.5601999999999709, -0.07999999999992273, 0.14, 0.11036306619644165, 0.5301394462585449, 0.6451095342636108, 0.006938707143748524, 0.9841165499302994, -0.177300997173009, 0.005552197575213624], [-0.5601999999999709, -0.08999999999992302, 0.14, 0.11036306619644165, 0.5301394462585449, 0.6451095342636108, 0.006938707143748524, 0.9841165499302994, -0.177300997173009, 0.005552197575213624], [-0.5601999999999709, -0.0999999999999233, 0.14, 0.11036306619644165, 0.5301394462585449, 0.6451095342636108, 0.006938707143748524, 0.9841165499302994, -0.177300997173009, 0.005552197575213624], [-0.5601999999999709, -0.10999999999992359, 0.14, 0.11036306619644165, 0.5301394462585449, 0.6451095342636108, 0.006938707143748524, 0.9841165499302994, -0.177300997173009, 0.005552197575213624], [-0.5601999999999709, -0.11999999999992388, 0.14, 0.11036306619644165, 0.5301394462585449, 0.6451095342636108, 0.006938707143748524, 0.9841165499302994, -0.177300997173009, 0.005552197575213624], [-0.5601999999999709, -0.12999999999992415, 0.14, 0.11036306619644165, 0.5301394462585449, 0.6451095342636108, 0.006938707143748524, 0.9841165499302994, -0.177300997173009, 0.005552197575213624], [-0.5601999999999709, -0.13999999999992443, 0.14, 0.11036306619644165, 0.5301394462585449, 0.6451095342636108, 0.006938707143748524, 0.9841165499302994, -0.177300997173009, 0.005552197575213624], [-0.5601999999999709, -0.14999999999992472, 0.14, 0.11036306619644165, 0.5301394462585449, 0.6451095342636108, 0.006938707143748524, 0.9841165499302994, -0.177300997173009, 0.005552197575213624], [-0.5601999999999709, -0.159999999999925, 0.14, 0.11036306619644165, 0.5301394462585449, 0.6451095342636108, 0.006938707143748524, 0.9841165499302994, -0.177300997173009, 0.005552197575213624], [-0.5601999999999709, -0.1699999999999253, 0.14, 0.11036306619644165, 0.5301394462585449, 0.6451095342636108, 0.006938707143748524, 0.9841165499302994, -0.177300997173009, 0.005552197575213624], [-0.5601999999999709, -0.17999999999992558, 0.14, 0.11036306619644165, 0.5301394462585449, 0.6451095342636108, 0.006938707143748524, 0.9841165499302994, -0.177300997173009, 0.005552197575213624], [-0.5601999999999709, -0.18999999999992587, 0.14, 0.11036306619644165, 0.5301394462585449, 0.6451095342636108, 0.006938707143748524, 0.9841165499302994, -0.177300997173009, 0.005552197575213624], [-0.5601999999999709, -0.19999999999992615, 0.14, 0.11036306619644165, 0.5301394462585449, 0.6451095342636108, 0.006938707143748524, 0.9841165499302994, -0.177300997173009, 0.005552197575213624], [-0.5601999999999709, -0.20999999999992644, 0.14, 0.11036306619644165, 0.5301394462585449, 0.6451095342636108, 0.006938707143748524, 0.9841165499302994, -0.177300997173009, 0.005552197575213624], [-0.5601999999999709, -0.21999999999992673, 0.14, 0.11036306619644165, 0.5301394462585449, 0.6451095342636108, 0.006938707143748524, 0.9841165499302994, -0.177300997173009, 0.005552197575213624], [-0.5601999999999709, -0.229999999999927, 0.14, 0.11036306619644165, 0.5301394462585449, 0.6451095342636108, 0.006938707143748524, 0.9841165499302994, -0.177300997173009, 0.005552197575213624], [-0.5601999999999709, -0.2399999999999273, 0.14, 0.11036306619644165, 0.5301394462585449, 0.6451095342636108, 0.006938707143748524, 0.9841165499302994, -0.177300997173009, 0.005552197575213624], [-0.5601999999999709, -0.24999999999992759, 0.14, 0.11036306619644165, 0.5301394462585449, 0.6451095342636108, 0.006938707143748524, 0.9841165499302994, -0.177300997173009, 0.005552197575213624], [-0.5601999999999709, -0.2599999999999265, 0.14, 0.11036306619644165, 0.5301394462585449, 0.6451095342636108, 0.006938707143748524, 0.9841165499302994, -0.177300997173009, 0.005552197575213624], [-0.5601999999999709, -0.2699999999999254, 0.14, 0.11036306619644165, 0.5301394462585449, 0.6451095342636108, 0.006938707143748524, 0.9841165499302994, -0.177300997173009, 0.005552197575213624], [-0.5601999999999709, -0.2799999999999243, 0.14, 0.11036306619644165, 0.5301394462585449, 0.6451095342636108, 0.006938707143748524, 0.9841165499302994, -0.177300997173009, 0.005552197575213624], [-0.5601999999999709, -0.2899999999999232, 0.14, 0.11036306619644165, 0.5301394462585449, 0.6451095342636108, 0.006938707143748524, 0.9841165499302994, -0.177300997173009, 0.005552197575213624], [-0.550199999999972, -0.2899999999999232, 0.14, 0.11036306619644165, 0.5301394462585449, 0.6451095342636108, 0.006938707143748524, 0.9841165499302994, -0.177300997173009, 0.005552197575213624], [-0.5401999999999731, -0.2899999999999232, 0.14, 0.11036306619644165, 0.5301394462585449, 0.6451095342636108, 0.006938707143748524, 0.9841165499302994, -0.177300997173009, 0.005552197575213624], [-0.5301999999999742, -0.2899999999999232, 0.14, 0.11036306619644165, 0.5301394462585449, 0.6451095342636108, 0.006938707143748524, 0.9841165499302994, -0.177300997173009, 0.005552197575213624], [-0.5201999999999753, -0.2899999999999232, 0.14, 0.11036306619644165, 0.5301394462585449, 0.6451095342636108, 0.006938707143748524, 0.9841165499302994, -0.177300997173009, 0.005552197575213624], [-0.5101999999999765, -0.2899999999999232, 0.14, 0.11036306619644165, 0.5301394462585449, 0.6451095342636108, 0.006938707143748524, 0.9841165499302994, -0.177300997173009, 0.005552197575213624], [-0.5001999999999776, -0.2899999999999232, 0.14, 0.11036306619644165, 0.5301394462585449, 0.6451095342636108, 0.006938707143748524, 0.9841165499302994, -0.177300997173009, 0.005552197575213624], [-0.49019999999997865, -0.2899999999999232, 0.14, 0.11036306619644165, 0.5301394462585449, 0.6451095342636108, 0.006938707143748524, 0.9841165499302994, -0.177300997173009, 0.005552197575213624], [-0.48019999999997975, -0.2899999999999232, 0.14, 0.11036306619644165, 0.5301394462585449, 0.6451095342636108, 0.006938707143748524, 0.9841165499302994, -0.177300997173009, 0.005552197575213624], [-0.47019999999998086, -0.2899999999999232, 0.14, 0.11036306619644165, 0.5301394462585449, 0.6451095342636108, 0.006938707143748524, 0.9841165499302994, -0.177300997173009, 0.005552197575213624], [-0.46019999999998196, -0.2899999999999232, 0.14, 0.11036306619644165, 0.5301394462585449, 0.6451095342636108, 0.006938707143748524, 0.9841165499302994, -0.177300997173009, 0.005552197575213624], [-0.45019999999998306, -0.2899999999999232, 0.14, 0.11036306619644165, 0.5301394462585449, 0.6451095342636108, 0.006938707143748524, 0.9841165499302994, -0.177300997173009, 0.005552197575213624], [-0.44019999999998416, -0.2899999999999232, 0.14, 0.11036306619644165, 0.5301394462585449, 0.6451095342636108, 0.006938707143748524, 0.9841165499302994, -0.177300997173009, 0.005552197575213624], [-0.43019999999998526, -0.2899999999999232, 0.14, 0.11036306619644165, 0.5301394462585449, 0.6451095342636108, 0.006938707143748524, 0.9841165499302994, -0.177300997173009, 0.005552197575213624], [-0.42019999999998636, -0.2899999999999232, 0.14, 0.11036306619644165, 0.5301394462585449, 0.6451095342636108, 0.006938707143748524, 0.9841165499302994, -0.177300997173009, 0.005552197575213624], [-0.41019999999998746, -0.2899999999999232, 0.14, 0.11036306619644165, 0.5301394462585449, 0.6451095342636108, 0.006938707143748524, 0.9841165499302994, -0.177300997173009, 0.005552197575213624], [-0.40019999999998856, -0.2899999999999232, 0.14, 0.11036306619644165, 0.5301394462585449, 0.6451095342636108, 0.006938707143748524, 0.9841165499302994, -0.177300997173009, 0.005552197575213624], [-0.39019999999998967, -0.2899999999999232, 0.14, 0.11036306619644165, 0.5301394462585449, 0.6451095342636108, 0.006938707143748524, 0.9841165499302994, -0.177300997173009, 0.005552197575213624], [-0.38019999999999077, -0.2899999999999232, 0.14, 0.11036306619644165, 0.5301394462585449, 0.6451095342636108, 0.006938707143748524, 0.9841165499302994, -0.177300997173009, 0.005552197575213624], [-0.37019999999999187, -0.2899999999999232, 0.14, 0.11036306619644165, 0.5301394462585449, 0.6451095342636108, 0.006938707143748524, 0.9841165499302994, -0.177300997173009, 0.005552197575213624], [-0.36019999999999297, -0.2899999999999232, 0.14, 0.11036306619644165, 0.5301394462585449, 0.6451095342636108, 0.006938707143748524, 0.9841165499302994, -0.177300997173009, 0.005552197575213624], [-0.36019999999999297, -0.2799999999999243, 0.14, 0.11036306619644165, 0.5301394462585449, 0.6451095342636108, 0.006938707143748524, 0.9841165499302994, -0.177300997173009, 0.005552197575213624], [-0.36019999999999297, -0.2699999999999254, 0.14, 0.11036306619644165, 0.5301394462585449, 0.6451095342636108, 0.006938707143748524, 0.9841165499302994, -0.177300997173009, 0.005552197575213624], [-0.36019999999999297, -0.2599999999999265, 0.14, 0.11036306619644165, 0.5301394462585449, 0.6451095342636108, 0.006938707143748524, 0.9841165499302994, -0.177300997173009, 0.005552197575213624], [-0.36019999999999297, -0.24999999999992759, 0.14, 0.11036306619644165, 0.5301394462585449, 0.6451095342636108, 0.006938707143748524, 0.9841165499302994, -0.177300997173009, 0.005552197575213624], [-0.36019999999999297, -0.2399999999999273, 0.14, 0.11036306619644165, 0.5301394462585449, 0.6451095342636108, 0.006938707143748524, 0.9841165499302994, -0.177300997173009, 0.005552197575213624], [-0.36019999999999297, -0.229999999999927, 0.14, 0.11036306619644165, 0.5301394462585449, 0.6451095342636108, 0.006938707143748524, 0.9841165499302994, -0.177300997173009, 0.005552197575213624], [-0.36019999999999297, -0.21999999999992673, 0.14, 0.11036306619644165, 0.5301394462585449, 0.6451095342636108, 0.006938707143748524, 0.9841165499302994, -0.177300997173009, 0.005552197575213624], [-0.36019999999999297, -0.20999999999992644, 0.14, 0.11036306619644165, 0.5301394462585449, 0.6451095342636108, 0.006938707143748524, 0.9841165499302994, -0.177300997173009, 0.005552197575213624], [-0.36019999999999297, -0.19999999999992615, 0.14, 0.11036306619644165, 0.5301394462585449, 0.6451095342636108, 0.006938707143748524, 0.9841165499302994, -0.177300997173009, 0.005552197575213624], [-0.36019999999999297, -0.18999999999992587, 0.14, 0.11036306619644165, 0.5301394462585449, 0.6451095342636108, 0.006938707143748524, 0.9841165499302994, -0.177300997173009, 0.005552197575213624], [-0.36019999999999297, -0.17999999999992558, 0.14, 0.11036306619644165, 0.5301394462585449, 0.6451095342636108, 0.006938707143748524, 0.9841165499302994, -0.177300997173009, 0.005552197575213624], [-0.36019999999999297, -0.1699999999999253, 0.14, 0.11036306619644165, 0.5301394462585449, 0.6451095342636108, 0.006938707143748524, 0.9841165499302994, -0.177300997173009, 0.005552197575213624], [-0.36019999999999297, -0.159999999999925, 0.14, 0.11036306619644165, 0.5301394462585449, 0.6451095342636108, 0.006938707143748524, 0.9841165499302994, -0.177300997173009, 0.005552197575213624], [-0.36019999999999297, -0.14999999999992472, 0.14, 0.11036306619644165, 0.5301394462585449, 0.6451095342636108, 0.006938707143748524, 0.9841165499302994, -0.177300997173009, 0.005552197575213624], [-0.36019999999999297, -0.13999999999992443, 0.14, 0.11036306619644165, 0.5301394462585449, 0.6451095342636108, 0.006938707143748524, 0.9841165499302994, -0.177300997173009, 0.005552197575213624], [-0.36019999999999297, -0.12999999999992415, 0.14, 0.11036306619644165, 0.5301394462585449, 0.6451095342636108, 0.006938707143748524, 0.9841165499302994, -0.177300997173009, 0.005552197575213624], [-0.36019999999999297, -0.11999999999992386, 0.14, 0.11036306619644165, 0.5301394462585449, 0.6451095342636108, 0.006938707143748524, 0.9841165499302994, -0.177300997173009, 0.005552197575213624], [-0.36019999999999297, -0.11019999999992358, 0.14, 0.11036306619644165, 0.5301394462585449, 0.6451095342636108, 0.006938707143748524, 0.9841165499302994, -0.177300997173009, 0.005552197575213624], [-0.36019999999999297, -0.11019999999992358, 0.14, 0.11036306619644165, 0.5301394462585449, 0.6451095342636108, 0.006938707143748524, 0.9841165499302994, -0.177300997173009, 0.005552197575213624], [-0.36019999999999297, -0.11019999999992358, 0.14, 0.11036306619644165, 0.5301394462585449, 0.6451095342636108, 0.006938707143748524, 0.9841165499302994, -0.177300997173009, 0.005552197575213624], [-0.36019999999999297, -0.11019999999992358, 0.14, 0.11036306619644165, 0.5301394462585449, 0.6451095342636108, 0.006938707143748524, 0.9841165499302994, -0.177300997173009, 0.005552197575213624], [-0.36019999999999297, -0.11019999999992358, 0.14, 0.11036306619644165, 0.5301394462585449, 0.6451095342636108, 0.006938707143748524, 0.9841165499302994, -0.177300997173009, 0.005552197575213624], [-0.36019999999999297, -0.11019999999992358, 0.14, 0.11036306619644165, 0.5301394462585449, 0.6451095342636108, 0.006938707143748524, 0.9841165499302994, -0.177300997173009, 0.005552197575213624], [-0.36019999999999297, -0.11019999999992358, 0.14, 0.11036306619644165, 0.5301394462585449, 0.6451095342636108, 0.006938707143748524, 0.9841165499302994, -0.177300997173009, 0.005552197575213624], [-0.36019999999999297, -0.11019999999992358, 0.14, 0.11036306619644165, 0.5301394462585449, 0.6451095342636108, 0.006938707143748524, 0.9841165499302994, -0.177300997173009, 0.005552197575213624], [-0.36019999999999297, -0.11019999999992358, 0.14, 0.11036306619644165, 0.5301394462585449, 0.6451095342636108, 0.006938707143748524, 0.9841165499302994, -0.177300997173009, 0.005552197575213624], [-0.36019999999999297, -0.11019999999992358, 0.14, 0.11036306619644165, 0.5301394462585449, 0.6451095342636108, 0.006938707143748524, 0.9841165499302994, -0.177300997173009, 0.005552197575213624], [-0.36019999999999297, -0.11019999999992358, 0.14, 0.11036306619644165, 0.5301394462585449, 0.6451095342636108, 0.006938707143748524, 0.9841165499302994, -0.177300997173009, 0.005552197575213624], [-0.36019999999999297, -0.11019999999992358, 0.14, 0.11036306619644165, 0.5301394462585449, 0.6451095342636108, 0.006938707143748524, 0.9841165499302994, -0.177300997173009, 0.005552197575213624], [-0.36019999999999297, -0.11019999999992358, 0.14, 0.11036306619644165, 0.5301394462585449, 0.6451095342636108, 0.006938707143748524, 0.9841165499302994, -0.177300997173009, 0.005552197575213624], [-0.36019999999999297, -0.11019999999992358, 0.14, 0.11036306619644165, 0.5301394462585449, 0.6451095342636108, 0.006938707143748524, 0.9841165499302994, -0.177300997173009, 0.005552197575213624], [-0.36019999999999297, -0.11019999999992358, 0.14, 0.11036306619644165, 0.5301394462585449, 0.6451095342636108, 0.006938707143748524, 0.9841165499302994, -0.177300997173009, 0.005552197575213624], [-0.36019999999999297, -0.11019999999992358, 0.14, 0.11036306619644165, 0.5301394462585449, 0.6451095342636108, 0.006938707143748524, 0.9841165499302994, -0.177300997173009, 0.005552197575213624], [-0.36019999999999297, -0.11019999999992358, 0.14, 0.11036306619644165, 0.5301394462585449, 0.6451095342636108, 0.006938707143748524, 0.9841165499302994, -0.177300997173009, 0.005552197575213624], [-0.36019999999999297, -0.11019999999992358, 0.14, 0.11036306619644165, 0.5301394462585449, 0.6451095342636108, 0.006938707143748524, 0.9841165499302994, -0.177300997173009, 0.005552197575213624], [-0.36019999999999297, -0.11019999999992358, 0.14, 0.11036306619644165, 0.5301394462585449, 0.6451095342636108, 0.006938707143748524, 0.9841165499302994, -0.177300997173009, 0.005552197575213624], [-0.36019999999999297, -0.11019999999992358, 0.14, 0.11036306619644165, 0.5301394462585449, 0.6451095342636108, 0.006938707143748524, 0.9841165499302994, -0.177300997173009, 0.005552197575213624], [-0.36019999999999297, -0.11019999999992358, 0.14, 0.11036306619644165, 0.5301394462585449, 0.6451095342636108, 0.006938707143748524, 0.9841165499302994, -0.177300997173009, 0.005552197575213624], [-0.36019999999999297, -0.11019999999992358, 0.14, 0.11036306619644165, 0.5301394462585449, 0.6451095342636108, 0.006938707143748524, 0.9841165499302994, -0.177300997173009, 0.005552197575213624], [-0.36019999999999297, -0.11019999999992358, 0.14, 0.11036306619644165, 0.5301394462585449, 0.6451095342636108, 0.006938707143748524, 0.9841165499302994, -0.177300997173009, 0.005552197575213624], [-0.36019999999999297, -0.11019999999992358, 0.1500000000000003, 0.11036306619644165, 0.5301394462585449, 0.6451095342636108, 0.006938707143748524, 0.9841165499302994, -0.177300997173009, 0.005552197575213624], [-0.36019999999999297, -0.11019999999992358, 0.1600000000000006, 0.11036306619644165, 0.5301394462585449, 0.6451095342636108, 0.006938707143748524, 0.9841165499302994, -0.177300997173009, 0.005552197575213624], [-0.36019999999999297, -0.11019999999992358, 0.17000000000000087, 0.11036306619644165, 0.5301394462585449, 0.6451095342636108, 0.006938707143748524, 0.9841165499302994, -0.177300997173009, 0.005552197575213624], [-0.36019999999999297, -0.11019999999992358, 0.18000000000000116, 0.11036306619644165, 0.5301394462585449, 0.6451095342636108, 0.006938707143748524, 0.9841165499302994, -0.177300997173009, 0.005552197575213624], [-0.36019999999999297, -0.11019999999992358, 0.19000000000000145, 0.11036306619644165, 0.5301394462585449, 0.6451095342636108, 0.006938707143748524, 0.9841165499302994, -0.177300997173009, 0.005552197575213624], [-0.36019999999999297, -0.11019999999992358, 0.20000000000000173, 0.11036306619644165, 0.5301394462585449, 0.6451095342636108, 0.006938707143748524, 0.9841165499302994, -0.177300997173009, 0.005552197575213624], [-0.36019999999999297, -0.11019999999992358, 0.21000000000000202, 0.11036306619644165, 0.5301394462585449, 0.6451095342636108, 0.006938707143748524, 0.9841165499302994, -0.177300997173009, 0.005552197575213624], [-0.36019999999999297, -0.11019999999992358, 0.2200000000000023, 0.11036306619644165, 0.5301394462585449, 0.6451095342636108, 0.006938707143748524, 0.9841165499302994, -0.177300997173009, 0.005552197575213624], [-0.36019999999999297, -0.11019999999992358, 0.2300000000000026, 0.11036306619644165, 0.5301394462585449, 0.6451095342636108, 0.006938707143748524, 0.9841165499302994, -0.177300997173009, 0.005552197575213624], [-0.36019999999999297, -0.11019999999992358, 0.24000000000000288, 0.11036306619644165, 0.5301394462585449, 0.6451095342636108, 0.006938707143748524, 0.9841165499302994, -0.177300997173009, 0.005552197575213624], [-0.36019999999999297, -0.11019999999992358, 0.25000000000000316, 0.11036306619644165, 0.5301394462585449, 0.6451095342636108, 0.006938707143748524, 0.9841165499302994, -0.177300997173009, 0.005552197575213624], [-0.36019999999999297, -0.11019999999992358, 0.26000000000000206, 0.11036306619644165, 0.5301394462585449, 0.6451095342636108, 0.006938707143748524, 0.9841165499302994, -0.177300997173009, 0.005552197575213624], [-0.36019999999999297, -0.11019999999992358, 0.27000000000000096, 0.11036306619644165, 0.5301394462585449, 0.6451095342636108, 0.006938707143748524, 0.9841165499302994, -0.177300997173009, 0.005552197575213624], [-0.36019999999999297, -0.11019999999992358, 0.27999999999999986, 0.11036306619644165, 0.5301394462585449, 0.6451095342636108, 0.006938707143748524, 0.9841165499302994, -0.177300997173009, 0.005552197575213624], [-0.36019999999999297, -0.11019999999992358, 0.28999999999999876, 0.11036306619644165, 0.5301394462585449, 0.6451095342636108, 0.006938707143748524, 0.9841165499302994, -0.177300997173009, 0.005552197575213624], [-0.36019999999999297, -0.11019999999992358, 0.29999999999999766, 0.11036306619644165, 0.5301394462585449, 0.6451095342636108, 0.006938707143748524, 0.9841165499302994, -0.177300997173009, 0.005552197575213624], [-0.36019999999999297, -0.11019999999992358, 0.30999999999999656, 0.11036306619644165, 0.5301394462585449, 0.6451095342636108, 0.006938707143748524, 0.9841165499302994, -0.177300997173009, 0.005552197575213624], [-0.36019999999999297, -0.11019999999992358, 0.31999999999999545, 0.11036306619644165, 0.5301394462585449, 0.6451095342636108, 0.006938707143748524, 0.9841165499302994, -0.177300997173009, 0.005552197575213624], [-0.36019999999999297, -0.11019999999992358, 0.32999999999999435, 0.11036306619644165, 0.5301394462585449, 0.6451095342636108, 0.006938707143748524, 0.9841165499302994, -0.177300997173009, 0.005552197575213624], [-0.36019999999999297, -0.11019999999992358, 0.33999999999999325, 0.11036306619644165, 0.5301394462585449, 0.6451095342636108, 0.006938707143748524, 0.9841165499302994, -0.177300997173009, 0.005552197575213624], [-0.36019999999999297, -0.1001999999999233, 0.33999999999999325, 0.11036306619644165, 0.5301394462585449, 0.6451095342636108, 0.006938707143748524, 0.9841165499302994, -0.177300997173009, 0.005552197575213624], [-0.36019999999999297, -0.09019999999992301, 0.33999999999999325, 0.11036306619644165, 0.5301394462585449, 0.6451095342636108, 0.006938707143748524, 0.9841165499302994, -0.177300997173009, 0.005552197575213624], [-0.36019999999999297, -0.08019999999992272, 0.33999999999999325, 0.11036306619644165, 0.5301394462585449, 0.6451095342636108, 0.006938707143748524, 0.9841165499302994, -0.177300997173009, 0.005552197575213624], [-0.36019999999999297, -0.07019999999992244, 0.33999999999999325, 0.11036306619644165, 0.5301394462585449, 0.6451095342636108, 0.006938707143748524, 0.9841165499302994, -0.177300997173009, 0.005552197575213624], [-0.36019999999999297, -0.06019999999992223, 0.33999999999999325, 0.11036306619644165, 0.5301394462585449, 0.6451095342636108, 0.006938707143748524, 0.9841165499302994, -0.177300997173009, 0.005552197575213624], [-0.36019999999999297, -0.05019999999992229, 0.33999999999999325, 0.11036306619644165, 0.5301394462585449, 0.6451095342636108, 0.006938707143748524, 0.9841165499302994, -0.177300997173009, 0.005552197575213624], [-0.36019999999999297, -0.04019999999992235, 0.33999999999999325, 0.11036306619644165, 0.5301394462585449, 0.6451095342636108, 0.006938707143748524, 0.9841165499302994, -0.177300997173009, 0.005552197575213624], [-0.36019999999999297, -0.030199999999922414, 0.33999999999999325, 0.11036306619644165, 0.5301394462585449, 0.6451095342636108, 0.006938707143748524, 0.9841165499302994, -0.177300997173009, 0.005552197575213624], [-0.36019999999999297, -0.020199999999922474, 0.33999999999999325, 0.11036306619644165, 0.5301394462585449, 0.6451095342636108, 0.006938707143748524, 0.9841165499302994, -0.177300997173009, 0.005552197575213624], [-0.36019999999999297, -0.010199999999922486, 0.33999999999999325, 0.11036306619644165, 0.5301394462585449, 0.6451095342636108, 0.006938707143748524, 0.9841165499302994, -0.177300997173009, 0.005552197575213624], [-0.36019999999999297, -0.010199999999922486, 0.32999999999999435, 0.11036306619644165, 0.5301394462585449, 0.6451095342636108, 0.006938707143748524, 0.9841165499302994, -0.177300997173009, 0.005552197575213624], [-0.36019999999999297, -0.010199999999922486, 0.31999999999999545, 0.11036306619644165, 0.5301394462585449, 0.6451095342636108, 0.006938707143748524, 0.9841165499302994, -0.177300997173009, 0.005552197575213624], [-0.36019999999999297, -0.010199999999922486, 0.31019999999999653, 0.11036306619644165, 0.5301394462585449, 0.6451095342636108, 0.006938707143748524, 0.9841165499302994, -0.177300997173009, 0.005552197575213624], [-0.36019999999999297, -0.010199999999922486, 0.31019999999999653, 0.11036306619644165, 0.5301394462585449, 0.6451095342636108, 0.006938707143748524, 0.9841165499302994, -0.177300997173009, 0.005552197575213624], [-0.36019999999999297, -0.010199999999922486, 0.31019999999999653, 0.11036306619644165, 0.5301394462585449, 0.6451095342636108, 0.006938707143748524, 0.9841165499302994, -0.177300997173009, 0.005552197575213624], [-0.36019999999999297, -0.010199999999922486, 0.31019999999999653, 0.11036306619644165, 0.5301394462585449, 0.6451095342636108, 0.006938707143748524, 0.9841165499302994, -0.177300997173009, 0.005552197575213624], [-0.36019999999999297, -0.010199999999922486, 0.31019999999999653, 0.11036306619644165, 0.5301394462585449, 0.6451095342636108, 0.006938707143748524, 0.9841165499302994, -0.177300997173009, 0.005552197575213624], [-0.36019999999999297, -0.010199999999922486, 0.31019999999999653, 0.11036306619644165, 0.5301394462585449, 0.6451095342636108, 0.006938707143748524, 0.9841165499302994, -0.177300997173009, 0.005552197575213624], [-0.36019999999999297, -0.010199999999922486, 0.31019999999999653, 0.11036306619644165, 0.5301394462585449, 0.6451095342636108, 0.006938707143748524, 0.9841165499302994, -0.177300997173009, 0.005552197575213624], [-0.36019999999999297, -0.010199999999922486, 0.31019999999999653, 0.11036306619644165, 0.5301394462585449, 0.6451095342636108, 0.006938707143748524, 0.9841165499302994, -0.177300997173009, 0.005552197575213624], [-0.36019999999999297, -0.010199999999922486, 0.31019999999999653, 0.11036306619644165, 0.5301394462585449, 0.6451095342636108, 0.006938707143748524, 0.9841165499302994, -0.177300997173009, 0.005552197575213624], [-0.36019999999999297, -0.010199999999922486, 0.31019999999999653, 0.11036306619644165, 0.5301394462585449, 0.6451095342636108, 0.006938707143748524, 0.9841165499302994, -0.177300997173009, 0.005552197575213624], [-0.36019999999999297, -0.010199999999922486, 0.31019999999999653, 0.11036306619644165, 0.5301394462585449, 0.6451095342636108, 0.006938707143748524, 0.9841165499302994, -0.177300997173009, 0.005552197575213624], [-0.36019999999999297, -0.010199999999922486, 0.31019999999999653, 0.11036306619644165, 0.5301394462585449, 0.6451095342636108, 0.006938707143748524, 0.9841165499302994, -0.177300997173009, 0.005552197575213624], [-0.36019999999999297, -0.010199999999922486, 0.31019999999999653, 0.11036306619644165, 0.5301394462585449, 0.6451095342636108, 0.006938707143748524, 0.9841165499302994, -0.177300997173009, 0.005552197575213624], [-0.36019999999999297, -0.010199999999922486, 0.31019999999999653, 0.11036306619644165, 0.5301394462585449, 0.6451095342636108, 0.006938707143748524, 0.9841165499302994, -0.177300997173009, 0.005552197575213624], [-0.36019999999999297, -0.010199999999922486, 0.31019999999999653, 0.11036306619644165, 0.5301394462585449, 0.6451095342636108, 0.006938707143748524, 0.9841165499302994, -0.177300997173009, 0.005552197575213624], [-0.36019999999999297, -0.010199999999922486, 0.31019999999999653, 0.11036306619644165, 0.5301394462585449, 0.6451095342636108, 0.006938707143748524, 0.9841165499302994, -0.177300997173009, 0.005552197575213624], [-0.36019999999999297, -0.010199999999922486, 0.31019999999999653, 0.11036306619644165, 0.5301394462585449, 0.6451095342636108, 0.006938707143748524, 0.9841165499302994, -0.177300997173009, 0.005552197575213624], [-0.36019999999999297, -0.010199999999922486, 0.31019999999999653, 0.11036306619644165, 0.5301394462585449, 0.6451095342636108, 0.006938707143748524, 0.9841165499302994, -0.177300997173009, 0.005552197575213624], [-0.35019999999999407, -0.010199999999922486, 0.31019999999999653, 0.11036306619644165, 0.5301394462585449, 0.6451095342636108, 0.006938707143748524, 0.9841165499302994, -0.177300997173009, 0.005552197575213624], [-0.3401999999999952, -0.010199999999922486, 0.31019999999999653, 0.11036306619644165, 0.5301394462585449, 0.6451095342636108, 0.006938707143748524, 0.9841165499302994, -0.177300997173009, 0.005552197575213624], [-0.3301999999999963, -0.010199999999922486, 0.31019999999999653, 0.11036306619644165, 0.5301394462585449, 0.6451095342636108, 0.006938707143748524, 0.9841165499302994, -0.177300997173009, 0.005552197575213624], [-0.3201999999999974, -0.010199999999922486, 0.31019999999999653, 0.11036306619644165, 0.5301394462585449, 0.6451095342636108, 0.006938707143748524, 0.9841165499302994, -0.177300997173009, 0.005552197575213624], [-0.3101999999999985, -0.010199999999922486, 0.31019999999999653, 0.11036306619644165, 0.5301394462585449, 0.6451095342636108, 0.006938707143748524, 0.9841165499302994, -0.177300997173009, 0.005552197575213624], [-0.3001999999999996, -0.010199999999922486, 0.31019999999999653, 0.11036306619644165, 0.5301394462585449, 0.6451095342636108, 0.006938707143748524, 0.9841165499302994, -0.177300997173009, 0.005552197575213624], [-0.2902000000000007, -0.010199999999922486, 0.31019999999999653, 0.11036306619644165, 0.5301394462585449, 0.6451095342636108, 0.006938707143748524, 0.9841165499302994, -0.177300997173009, 0.005552197575213624], [-0.2802000000000018, -0.010199999999922486, 0.31019999999999653, 0.11036306619644165, 0.5301394462585449, 0.6451095342636108, 0.006938707143748524, 0.9841165499302994, -0.177300997173009, 0.005552197575213624], [-0.2702000000000029, -0.010199999999922486, 0.31019999999999653, 0.11036306619644165, 0.5301394462585449, 0.6451095342636108, 0.006938707143748524, 0.9841165499302994, -0.177300997173009, 0.005552197575213624], [-0.260200000000004, -0.010199999999922486, 0.31019999999999653, 0.11036306619644165, 0.5301394462585449, 0.6451095342636108, 0.006938707143748524, 0.9841165499302994, -0.177300997173009, 0.005552197575213624], [-0.2502000000000051, -0.010199999999922486, 0.31019999999999653, 0.11036306619644165, 0.5301394462585449, 0.6451095342636108, 0.006938707143748524, 0.9841165499302994, -0.177300997173009, 0.005552197575213624], [-0.24020000000000483, -0.010199999999922486, 0.31019999999999653, 0.11036306619644165, 0.5301394462585449, 0.6451095342636108, 0.006938707143748524, 0.9841165499302994, -0.177300997173009, 0.005552197575213624], [-0.23020000000000454, -0.010199999999922486, 0.31019999999999653, 0.11036306619644165, 0.5301394462585449, 0.6451095342636108, 0.006938707143748524, 0.9841165499302994, -0.177300997173009, 0.005552197575213624], [-0.22020000000000425, -0.010199999999922486, 0.31019999999999653, 0.11036306619644165, 0.5301394462585449, 0.6451095342636108, 0.006938707143748524, 0.9841165499302994, -0.177300997173009, 0.005552197575213624], [-0.21020000000000397, -0.010199999999922486, 0.31019999999999653, 0.11036306619644165, 0.5301394462585449, 0.6451095342636108, 0.006938707143748524, 0.9841165499302994, -0.177300997173009, 0.005552197575213624], [-0.20020000000000368, -0.010199999999922486, 0.31019999999999653, 0.11036306619644165, 0.5301394462585449, 0.6451095342636108, 0.006938707143748524, 0.9841165499302994, -0.177300997173009, 0.005552197575213624], [-0.1902000000000034, -0.010199999999922486, 0.31019999999999653, 0.11036306619644165, 0.5301394462585449, 0.6451095342636108, 0.006938707143748524, 0.9841165499302994, -0.177300997173009, 0.005552197575213624], [-0.1802000000000031, -0.010199999999922486, 0.31019999999999653, 0.11036306619644165, 0.5301394462585449, 0.6451095342636108, 0.006938707143748524, 0.9841165499302994, -0.177300997173009, 0.005552197575213624], [-0.17020000000000282, -0.010199999999922486, 0.31019999999999653, 0.11036306619644165, 0.5301394462585449, 0.6451095342636108, 0.006938707143748524, 0.9841165499302994, -0.177300997173009, 0.005552197575213624], [-0.16020000000000253, -0.010199999999922486, 0.31019999999999653, 0.11036306619644165, 0.5301394462585449, 0.6451095342636108, 0.006938707143748524, 0.9841165499302994, -0.177300997173009, 0.005552197575213624], [-0.15020000000000225, -0.010199999999922486, 0.31019999999999653, 0.11036306619644165, 0.5301394462585449, 0.6451095342636108, 0.006938707143748524, 0.9841165499302994, -0.177300997173009, 0.005552197575213624], [-0.14020000000000196, -0.010199999999922486, 0.31019999999999653, 0.11036306619644165, 0.5301394462585449, 0.6451095342636108, 0.006938707143748524, 0.9841165499302994, -0.177300997173009, 0.005552197575213624], [-0.13020000000000168, -0.010199999999922486, 0.31019999999999653, 0.11036306619644165, 0.5301394462585449, 0.6451095342636108, 0.006938707143748524, 0.9841165499302994, -0.177300997173009, 0.005552197575213624], [-0.12020000000000139, -0.010199999999922486, 0.31019999999999653, 0.11036306619644165, 0.5301394462585449, 0.6451095342636108, 0.006938707143748524, 0.9841165499302994, -0.177300997173009, 0.005552197575213624], [-0.1102000000000011, -0.010199999999922486, 0.31019999999999653, 0.11036306619644165, 0.5301394462585449, 0.6451095342636108, 0.006938707143748524, 0.9841165499302994, -0.177300997173009, 0.005552197575213624], [-0.10020000000000082, -0.010199999999922486, 0.31019999999999653, 0.11036306619644165, 0.5301394462585449, 0.6451095342636108, 0.006938707143748524, 0.9841165499302994, -0.177300997173009, 0.005552197575213624], [-0.09020000000000053, -0.010199999999922486, 0.31019999999999653, 0.11036306619644165, 0.5301394462585449, 0.6451095342636108, 0.006938707143748524, 0.9841165499302994, -0.177300997173009, 0.005552197575213624], [-0.08020000000000024, -0.010199999999922486, 0.31019999999999653, 0.11036306619644165, 0.5301394462585449, 0.6451095342636108, 0.006938707143748524, 0.9841165499302994, -0.177300997173009, 0.005552197575213624], [-0.07019999999999996, -0.010199999999922486, 0.31019999999999653, 0.11036306619644165, 0.5301394462585449, 0.6451095342636108, 0.006938707143748524, 0.9841165499302994, -0.177300997173009, 0.005552197575213624], [-0.060199999999999754, -0.010199999999922486, 0.31019999999999653, 0.11036306619644165, 0.5301394462585449, 0.6451095342636108, 0.006938707143748524, 0.9841165499302994, -0.177300997173009, 0.005552197575213624], [-0.050199999999999814, -0.010199999999922486, 0.31019999999999653, 0.11036306619644165, 0.5301394462585449, 0.6451095342636108, 0.006938707143748524, 0.9841165499302994, -0.177300997173009, 0.005552197575213624], [-0.040199999999999875, -0.010199999999922486, 0.31019999999999653, 0.11036306619644165, 0.5301394462585449, 0.6451095342636108, 0.006938707143748524, 0.9841165499302994, -0.177300997173009, 0.005552197575213624], [-0.030199999999999935, -0.010199999999922486, 0.31019999999999653, 0.11036306619644165, 0.5301394462585449, 0.6451095342636108, 0.006938707143748524, 0.9841165499302994, -0.177300997173009, 0.005552197575213624], [-0.020199999999999996, -0.010199999999922486, 0.31019999999999653, 0.11036306619644165, 0.5301394462585449, 0.6451095342636108, 0.006938707143748524, 0.9841165499302994, -0.177300997173009, 0.005552197575213624], [-0.010200000000000008, -0.010199999999922486, 0.31019999999999653, 0.11036306619644165, 0.5301394462585449, 0.6451095342636108, 0.006938707143748524, 0.9841165499302994, -0.177300997173009, 0.005552197575213624], [-0.00020000000000000744, -0.010199999999922486, 0.31019999999999653, 0.11036306619644165, 0.5301394462585449, 0.6451095342636108, 0.006938707143748524, 0.9841165499302994, -0.177300997173009, 0.005552197575213624], [0.009799999999999993, -0.010199999999922486, 0.31019999999999653, 0.11036306619644165, 0.5301394462585449, 0.6451095342636108, 0.006938707143748524, 0.9841165499302994, -0.177300997173009, 0.005552197575213624], [0.019799999999999984, -0.010199999999922486, 0.31019999999999653, 0.11036306619644165, 0.5301394462585449, 0.6451095342636108, 0.006938707143748524, 0.9841165499302994, -0.177300997173009, 0.005552197575213624], [0.029799999999999924, -0.010199999999922486, 0.31019999999999653, 0.11036306619644165, 0.5301394462585449, 0.6451095342636108, 0.006938707143748524, 0.9841165499302994, -0.177300997173009, 0.005552197575213624], [0.03979999999999986, -0.010199999999922486, 0.31019999999999653, 0.11036306619644165, 0.5301394462585449, 0.6451095342636108, 0.006938707143748524, 0.9841165499302994, -0.177300997173009, 0.005552197575213624], [0.0497999999999998, -0.010199999999922486, 0.31019999999999653, 0.11036306619644165, 0.5301394462585449, 0.6451095342636108, 0.006938707143748524, 0.9841165499302994, -0.177300997173009, 0.005552197575213624], [0.05979999999999974, -0.010199999999922486, 0.31019999999999653, 0.11036306619644165, 0.5301394462585449, 0.6451095342636108, 0.006938707143748524, 0.9841165499302994, -0.177300997173009, 0.005552197575213624], [0.06979999999999993, -0.010199999999922486, 0.31019999999999653, 0.11036306619644165, 0.5301394462585449, 0.6451095342636108, 0.006938707143748524, 0.9841165499302994, -0.177300997173009, 0.005552197575213624], [0.07980000000000022, -0.010199999999922486, 0.31019999999999653, 0.11036306619644165, 0.5301394462585449, 0.6451095342636108, 0.006938707143748524, 0.9841165499302994, -0.177300997173009, 0.005552197575213624], [0.0898000000000005, -0.010199999999922486, 0.31019999999999653, 0.11036306619644165, 0.5301394462585449, 0.6451095342636108, 0.006938707143748524, 0.9841165499302994, -0.177300997173009, 0.005552197575213624], [0.09980000000000079, -0.010199999999922486, 0.31019999999999653, 0.11036306619644165, 0.5301394462585449, 0.6451095342636108, 0.006938707143748524, 0.9841165499302994, -0.177300997173009, 0.005552197575213624], [0.10980000000000108, -0.010199999999922486, 0.31019999999999653, 0.11036306619644165, 0.5301394462585449, 0.6451095342636108, 0.006938707143748524, 0.9841165499302994, -0.177300997173009, 0.005552197575213624], [0.11980000000000136, -0.010199999999922486, 0.31019999999999653, 0.11036306619644165, 0.5301394462585449, 0.6451095342636108, 0.006938707143748524, 0.9841165499302994, -0.177300997173009, 0.005552197575213624], [0.12980000000000164, -0.010199999999922486, 0.31019999999999653, 0.11036306619644165, 0.5301394462585449, 0.6451095342636108, 0.006938707143748524, 0.9841165499302994, -0.177300997173009, 0.005552197575213624], [0.13980000000000192, -0.010199999999922486, 0.31019999999999653, 0.11036306619644165, 0.5301394462585449, 0.6451095342636108, 0.006938707143748524, 0.9841165499302994, -0.177300997173009, 0.005552197575213624], [0.1498000000000022, -0.010199999999922486, 0.31019999999999653, 0.11036306619644165, 0.5301394462585449, 0.6451095342636108, 0.006938707143748524, 0.9841165499302994, -0.177300997173009, 0.005552197575213624], [0.1598000000000025, -0.010199999999922486, 0.31019999999999653, 0.11036306619644165, 0.5301394462585449, 0.6451095342636108, 0.006938707143748524, 0.9841165499302994, -0.177300997173009, 0.005552197575213624], [0.16980000000000278, -0.010199999999922486, 0.31019999999999653, 0.11036306619644165, 0.5301394462585449, 0.6451095342636108, 0.006938707143748524, 0.9841165499302994, -0.177300997173009, 0.005552197575213624], [0.17980000000000307, -0.010199999999922486, 0.31019999999999653, 0.11036306619644165, 0.5301394462585449, 0.6451095342636108, 0.006938707143748524, 0.9841165499302994, -0.177300997173009, 0.005552197575213624], [0.18980000000000335, -0.010199999999922486, 0.31019999999999653, 0.11036306619644165, 0.5301394462585449, 0.6451095342636108, 0.006938707143748524, 0.9841165499302994, -0.177300997173009, 0.005552197575213624], [0.19980000000000364, -0.010199999999922486, 0.31019999999999653, 0.11036306619644165, 0.5301394462585449, 0.6451095342636108, 0.006938707143748524, 0.9841165499302994, -0.177300997173009, 0.005552197575213624], [0.20980000000000393, -0.010199999999922486, 0.31019999999999653, 0.11036306619644165, 0.5301394462585449, 0.6451095342636108, 0.006938707143748524, 0.9841165499302994, -0.177300997173009, 0.005552197575213624], [0.21980000000000421, -0.010199999999922486, 0.31019999999999653, 0.11036306619644165, 0.5301394462585449, 0.6451095342636108, 0.006938707143748524, 0.9841165499302994, -0.177300997173009, 0.005552197575213624], [0.2298000000000045, -0.010199999999922486, 0.31019999999999653, 0.11036306619644165, 0.5301394462585449, 0.6451095342636108, 0.006938707143748524, 0.9841165499302994, -0.177300997173009, 0.005552197575213624], [0.2398000000000048, -0.010199999999922486, 0.31019999999999653, 0.11036306619644165, 0.5301394462585449, 0.6451095342636108, 0.006938707143748524, 0.9841165499302994, -0.177300997173009, 0.005552197575213624], [0.24980000000000507, -0.010199999999922486, 0.31019999999999653, 0.11036306619644165, 0.5301394462585449, 0.6451095342636108, 0.006938707143748524, 0.9841165499302994, -0.177300997173009, 0.005552197575213624], [0.25980000000000397, -0.010199999999922486, 0.31019999999999653, 0.11036306619644165, 0.5301394462585449, 0.6451095342636108, 0.006938707143748524, 0.9841165499302994, -0.177300997173009, 0.005552197575213624], [0.26980000000000287, -0.010199999999922486, 0.31019999999999653, 0.11036306619644165, 0.5301394462585449, 0.6451095342636108, 0.006938707143748524, 0.9841165499302994, -0.177300997173009, 0.005552197575213624], [0.27980000000000177, -0.010199999999922486, 0.31019999999999653, 0.11036306619644165, 0.5301394462585449, 0.6451095342636108, 0.006938707143748524, 0.9841165499302994, -0.177300997173009, 0.005552197575213624], [0.28980000000000067, -0.010199999999922486, 0.31019999999999653, 0.11036306619644165, 0.5301394462585449, 0.6451095342636108, 0.006938707143748524, 0.9841165499302994, -0.177300997173009, 0.005552197575213624], [0.29979999999999957, -0.010199999999922486, 0.31019999999999653, 0.11036306619644165, 0.5301394462585449, 0.6451095342636108, 0.006938707143748524, 0.9841165499302994, -0.177300997173009, 0.005552197575213624], [0.30979999999999847, -0.010199999999922486, 0.31019999999999653, 0.11036306619644165, 0.5301394462585449, 0.6451095342636108, 0.006938707143748524, 0.9841165499302994, -0.177300997173009, 0.005552197575213624], [0.31979999999999736, -0.010199999999922486, 0.31019999999999653, 0.11036306619644165, 0.5301394462585449, 0.6451095342636108, 0.006938707143748524, 0.9841165499302994, -0.177300997173009, 0.005552197575213624], [0.32979999999999626, -0.010199999999922486, 0.31019999999999653, 0.11036306619644165, 0.5301394462585449, 0.6451095342636108, 0.006938707143748524, 0.9841165499302994, -0.177300997173009, 0.005552197575213624], [0.33979999999999516, -0.010199999999922486, 0.31019999999999653, 0.11036306619644165, 0.5301394462585449, 0.6451095342636108, 0.006938707143748524, 0.9841165499302994, -0.177300997173009, 0.005552197575213624], [0.34979999999999406, -0.010199999999922486, 0.31019999999999653, 0.11036306619644165, 0.5301394462585449, 0.6451095342636108, 0.006938707143748524, 0.9841165499302994, -0.177300997173009, 0.005552197575213624], [0.35979999999999296, -0.010199999999922486, 0.31019999999999653, 0.11036306619644165, 0.5301394462585449, 0.6451095342636108, 0.006938707143748524, 0.9841165499302994, -0.177300997173009, 0.005552197575213624], [0.36979999999999186, -0.010199999999922486, 0.31019999999999653, 0.11036306619644165, 0.5301394462585449, 0.6451095342636108, 0.006938707143748524, 0.9841165499302994, -0.177300997173009, 0.005552197575213624], [0.37979999999999076, -0.010199999999922486, 0.31019999999999653, 0.11036306619644165, 0.5301394462585449, 0.6451095342636108, 0.006938707143748524, 0.9841165499302994, -0.177300997173009, 0.005552197575213624], [0.38979999999998965, -0.010199999999922486, 0.31019999999999653, 0.11036306619644165, 0.5301394462585449, 0.6451095342636108, 0.006938707143748524, 0.9841165499302994, -0.177300997173009, 0.005552197575213624], [0.39979999999998855, -0.010199999999922486, 0.31019999999999653, 0.11036306619644165, 0.5301394462585449, 0.6451095342636108, 0.006938707143748524, 0.9841165499302994, -0.177300997173009, 0.005552197575213624], [0.40979999999998745, -0.010199999999922486, 0.31019999999999653, 0.11036306619644165, 0.5301394462585449, 0.6451095342636108, 0.006938707143748524, 0.9841165499302994, -0.177300997173009, 0.005552197575213624], [0.41979999999998635, -0.010199999999922486, 0.31019999999999653, 0.11036306619644165, 0.5301394462585449, 0.6451095342636108, 0.006938707143748524, 0.9841165499302994, -0.177300997173009, 0.005552197575213624], [0.42979999999998525, -0.010199999999922486, 0.31019999999999653, 0.11036306619644165, 0.5301394462585449, 0.6451095342636108, 0.006938707143748524, 0.9841165499302994, -0.177300997173009, 0.005552197575213624], [0.43979999999998415, -0.010199999999922486, 0.31019999999999653, 0.11036306619644165, 0.5301394462585449, 0.6451095342636108, 0.006938707143748524, 0.9841165499302994, -0.177300997173009, 0.005552197575213624], [0.44979999999998305, -0.010199999999922486, 0.31019999999999653, 0.11036306619644165, 0.5301394462585449, 0.6451095342636108, 0.006938707143748524, 0.9841165499302994, -0.177300997173009, 0.005552197575213624], [0.45979999999998195, -0.010199999999922486, 0.31019999999999653, 0.11036306619644165, 0.5301394462585449, 0.6451095342636108, 0.006938707143748524, 0.9841165499302994, -0.177300997173009, 0.005552197575213624], [0.46979999999998084, -0.010199999999922486, 0.31019999999999653, 0.11036306619644165, 0.5301394462585449, 0.6451095342636108, 0.006938707143748524, 0.9841165499302994, -0.177300997173009, 0.005552197575213624], [0.47979999999997974, -0.010199999999922486, 0.31019999999999653, 0.11036306619644165, 0.5301394462585449, 0.6451095342636108, 0.006938707143748524, 0.9841165499302994, -0.177300997173009, 0.005552197575213624], [0.48979999999997864, -0.010199999999922486, 0.31019999999999653, 0.11036306619644165, 0.5301394462585449, 0.6451095342636108, 0.006938707143748524, 0.9841165499302994, -0.177300997173009, 0.005552197575213624], [0.49979999999997754, -0.010199999999922486, 0.31019999999999653, 0.11036306619644165, 0.5301394462585449, 0.6451095342636108, 0.006938707143748524, 0.9841165499302994, -0.177300997173009, 0.005552197575213624], [0.5097999999999765, -0.010199999999922486, 0.31019999999999653, 0.11036306619644165, 0.5301394462585449, 0.6451095342636108, 0.006938707143748524, 0.9841165499302994, -0.177300997173009, 0.005552197575213624], [0.5197999999999754, -0.010199999999922486, 0.31019999999999653, 0.11036306619644165, 0.5301394462585449, 0.6451095342636108, 0.006938707143748524, 0.9841165499302994, -0.177300997173009, 0.005552197575213624], [0.5297999999999743, -0.010199999999922486, 0.31019999999999653, 0.11036306619644165, 0.5301394462585449, 0.6451095342636108, 0.006938707143748524, 0.9841165499302994, -0.177300997173009, 0.005552197575213624], [0.5397999999999732, -0.010199999999922486, 0.31019999999999653, 0.11036306619644165, 0.5301394462585449, 0.6451095342636108, 0.006938707143748524, 0.9841165499302994, -0.177300997173009, 0.005552197575213624], [0.5497999999999721, -0.010199999999922486, 0.31019999999999653, 0.11036306619644165, 0.5301394462585449, 0.6451095342636108, 0.006938707143748524, 0.9841165499302994, -0.177300997173009, 0.005552197575213624], [0.559799999999971, -0.010199999999922486, 0.31019999999999653, 0.11036306619644165, 0.5301394462585449, 0.6451095342636108, 0.006938707143748524, 0.9841165499302994, -0.177300997173009, 0.005552197575213624], [0.5697999999999699, -0.010199999999922486, 0.31019999999999653, 0.11036306619644165, 0.5301394462585449, 0.6451095342636108, 0.006938707143748524, 0.9841165499302994, -0.177300997173009, 0.005552197575213624], [0.5797999999999688, -0.010199999999922486, 0.31019999999999653, 0.11036306619644165, 0.5301394462585449, 0.6451095342636108, 0.006938707143748524, 0.9841165499302994, -0.177300997173009, 0.005552197575213624], [0.5897999999999677, -0.010199999999922486, 0.31019999999999653, 0.11036306619644165, 0.5301394462585449, 0.6451095342636108, 0.006938707143748524, 0.9841165499302994, -0.177300997173009, 0.005552197575213624], [0.5997999999999666, -0.010199999999922486, 0.31019999999999653, 0.11036306619644165, 0.5301394462585449, 0.6451095342636108, 0.006938707143748524, 0.9841165499302994, -0.177300997173009, 0.005552197575213624], [0.6097999999999655, -0.010199999999922486, 0.31019999999999653, 0.11036306619644165, 0.5301394462585449, 0.6451095342636108, 0.006938707143748524, 0.9841165499302994, -0.177300997173009, 0.005552197575213624], [0.6197999999999644, -0.010199999999922486, 0.31019999999999653, 0.11036306619644165, 0.5301394462585449, 0.6451095342636108, 0.006938707143748524, 0.9841165499302994, -0.177300997173009, 0.005552197575213624], [0.6297999999999633, -0.010199999999922486, 0.31019999999999653, 0.11036306619644165, 0.5301394462585449, 0.6451095342636108, 0.006938707143748524, 0.9841165499302994, -0.177300997173009, 0.005552197575213624], [0.6397999999999622, -0.010199999999922486, 0.31019999999999653, 0.11036306619644165, 0.5301394462585449, 0.6451095342636108, 0.006938707143748524, 0.9841165499302994, -0.177300997173009, 0.005552197575213624], [0.6397999999999622, -0.00019999999992248611, 0.29019999999999596, 0.11036306619644165, 0.5301394462585449, 0.6451095342636108, 0.006938707143748524, 0.9841165499302994, -0.177300997173009, 0.005552197575213624], [0.6397999999999622, 0.009800000000077514, 0.2701999999999954, 0.11036306619644165, 0.5301394462585449, 0.6451095342636108, 0.006938707143748524, 0.9841165499302994, -0.177300997173009, 0.005552197575213624], [0.6397999999999622, 0.019800000000077506, 0.2501999999999948, 0.11036306619644165, 0.5301394462585449, 0.6451095342636108, 0.006938707143748524, 0.9841165499302994, -0.177300997173009, 0.005552197575213624], [0.6397999999999622, 0.029800000000077445, 0.23019999999999424, 0.11036306619644165, 0.5301394462585449, 0.6451095342636108, 0.006938707143748524, 0.9841165499302994, -0.177300997173009, 0.005552197575213624], [0.6397999999999622, 0.039800000000077385, 0.21019999999999367, 0.11036306619644165, 0.5301394462585449, 0.6451095342636108, 0.006938707143748524, 0.9841165499302994, -0.177300997173009, 0.005552197575213624], [0.6397999999999622, 0.049800000000077324, 0.1901999999999931, 0.11036306619644165, 0.5301394462585449, 0.6451095342636108, 0.006938707143748524, 0.9841165499302994, -0.177300997173009, 0.005552197575213624], [0.6397999999999622, 0.059800000000077264, 0.17019999999999252, 0.11036306619644165, 0.5301394462585449, 0.6451095342636108, 0.006938707143748524, 0.9841165499302994, -0.177300997173009, 0.005552197575213624], [0.6397999999999622, 0.06980000000007745, 0.15019999999999195, 0.11036306619644165, 0.5301394462585449, 0.6451095342636108, 0.006938707143748524, 0.9841165499302994, -0.177300997173009, 0.005552197575213624], [0.6397999999999622, 0.07980000000007774, 0.13019999999999138, 0.11036306619644165, 0.5301394462585449, 0.6451095342636108, 0.006938707143748524, 0.9841165499302994, -0.177300997173009, 0.005552197575213624], [0.6397999999999622, 0.08980000000007803, 0.11019999999999133, 0.11036306619644165, 0.5301394462585449, 0.6451095342636108, 0.006938707143748524, 0.9841165499302994, -0.177300997173009, 0.005552197575213624], [0.6397999999999622, 0.09980000000007831, 0.09019999999999145, 0.11036306619644165, 0.5301394462585449, 0.6451095342636108, 0.006938707143748524, 0.9841165499302994, -0.177300997173009, 0.005552197575213624], [0.6397999999999622, 0.1098000000000786, 0.08019999999999151, 0.11036306619644165, 0.5301394462585449, 0.6451095342636108, 0.006938707143748524, 0.9841165499302994, -0.177300997173009, 0.005552197575213624], [0.6397999999999622, 0.11980000000007889, 0.08019999999999151, 0.11036306619644165, 0.5301394462585449, 0.6451095342636108, 0.006938707143748524, 0.9841165499302994, -0.177300997173009, 0.005552197575213624], [0.6397999999999622, 0.12980000000007916, 0.08019999999999151, 0.11036306619644165, 0.5301394462585449, 0.6451095342636108, 0.006938707143748524, 0.9841165499302994, -0.177300997173009, 0.005552197575213624], [0.6397999999999622, 0.13980000000007944, 0.08019999999999151, 0.11036306619644165, 0.5301394462585449, 0.6451095342636108, 0.006938707143748524, 0.9841165499302994, -0.177300997173009, 0.005552197575213624], [0.6397999999999622, 0.14980000000007973, 0.08019999999999151, 0.11036306619644165, 0.5301394462585449, 0.6451095342636108, 0.006938707143748524, 0.9841165499302994, -0.177300997173009, 0.005552197575213624], [0.6397999999999622, 0.15980000000008002, 0.08019999999999151, 0.11036306619644165, 0.5301394462585449, 0.6451095342636108, 0.006938707143748524, 0.9841165499302994, -0.177300997173009, 0.005552197575213624], [0.6397999999999622, 0.1698000000000803, 0.08019999999999151, 0.11036306619644165, 0.5301394462585449, 0.6451095342636108, 0.006938707143748524, 0.9841165499302994, -0.177300997173009, 0.005552197575213624], [0.6397999999999622, 0.1798000000000806, 0.08019999999999151, 0.11036306619644165, 0.5301394462585449, 0.6451095342636108, 0.006938707143748524, 0.9841165499302994, -0.177300997173009, 0.005552197575213624], [0.6397999999999622, 0.18980000000008088, 0.08019999999999151, 0.11036306619644165, 0.5301394462585449, 0.6451095342636108, 0.006938707143748524, 0.9841165499302994, -0.177300997173009, 0.005552197575213624], [0.6397999999999622, 0.19980000000008116, 0.08019999999999151, 0.11036306619644165, 0.5301394462585449, 0.6451095342636108, 0.006938707143748524, 0.9841165499302994, -0.177300997173009, 0.005552197575213624], [0.6397999999999622, 0.20980000000008145, 0.08019999999999151, 0.11036306619644165, 0.5301394462585449, 0.6451095342636108, 0.006938707143748524, 0.9841165499302994, -0.177300997173009, 0.005552197575213624], [0.6397999999999622, 0.21980000000008174, 0.08019999999999151, 0.11036306619644165, 0.5301394462585449, 0.6451095342636108, 0.006938707143748524, 0.9841165499302994, -0.177300997173009, 0.005552197575213624], [0.6397999999999622, 0.22980000000008202, 0.08019999999999151, 0.11036306619644165, 0.5301394462585449, 0.6451095342636108, 0.006938707143748524, 0.9841165499302994, -0.177300997173009, 0.005552197575213624], [0.6397999999999622, 0.2398000000000823, 0.08019999999999151, 0.11036306619644165, 0.5301394462585449, 0.6451095342636108, 0.006938707143748524, 0.9841165499302994, -0.177300997173009, 0.005552197575213624], [0.6397999999999622, 0.2498000000000826, 0.08019999999999151, 0.11036306619644165, 0.5301394462585449, 0.6451095342636108, 0.006938707143748524, 0.9841165499302994, -0.177300997173009, 0.005552197575213624], [0.6397999999999622, 0.2598000000000815, 0.08019999999999151, 0.11036306619644165, 0.5301394462585449, 0.6451095342636108, 0.006938707143748524, 0.9841165499302994, -0.177300997173009, 0.005552197575213624], [0.6397999999999622, 0.2698000000000804, 0.08019999999999151, 0.11036306619644165, 0.5301394462585449, 0.6451095342636108, 0.006938707143748524, 0.9841165499302994, -0.177300997173009, 0.005552197575213624], [0.6397999999999622, 0.2798000000000793, 0.08019999999999151, 0.11036306619644165, 0.5301394462585449, 0.6451095342636108, 0.006938707143748524, 0.9841165499302994, -0.177300997173009, 0.005552197575213624], [0.6397999999999622, 0.2898000000000782, 0.08019999999999151, 0.11036306619644165, 0.5301394462585449, 0.6451095342636108, 0.006938707143748524, 0.9841165499302994, -0.177300997173009, 0.005552197575213624], [0.6397999999999622, 0.2998000000000771, 0.08019999999999151, 0.11036306619644165, 0.5301394462585449, 0.6451095342636108, 0.006938707143748524, 0.9841165499302994, -0.177300997173009, 0.005552197575213624], [0.6397999999999622, 0.309800000000076, 0.08019999999999151, 0.11036306619644165, 0.5301394462585449, 0.6451095342636108, 0.006938707143748524, 0.9841165499302994, -0.177300997173009, 0.005552197575213624], [0.6397999999999622, 0.3198000000000749, 0.08019999999999151, 0.11036306619644165, 0.5301394462585449, 0.6451095342636108, 0.006938707143748524, 0.9841165499302994, -0.177300997173009, 0.005552197575213624], [0.6397999999999622, 0.3298000000000738, 0.08019999999999151, 0.11036306619644165, 0.5301394462585449, 0.6451095342636108, 0.006938707143748524, 0.9841165499302994, -0.177300997173009, 0.005552197575213624], [0.6397999999999622, 0.3398000000000727, 0.08019999999999151, 0.11036306619644165, 0.5301394462585449, 0.6451095342636108, 0.006938707143748524, 0.9841165499302994, -0.177300997173009, 0.005552197575213624], [0.6397999999999622, 0.3498000000000716, 0.08019999999999151, 0.11036306619644165, 0.5301394462585449, 0.6451095342636108, 0.006938707143748524, 0.9841165499302994, -0.177300997173009, 0.005552197575213624], [0.6397999999999622, 0.3598000000000705, 0.08019999999999151, 0.11036306619644165, 0.5301394462585449, 0.6451095342636108, 0.006938707143748524, 0.9841165499302994, -0.177300997173009, 0.005552197575213624], [0.6397999999999622, 0.3698000000000694, 0.08019999999999151, 0.11036306619644165, 0.5301394462585449, 0.6451095342636108, 0.006938707143748524, 0.9841165499302994, -0.177300997173009, 0.005552197575213624], [0.6397999999999622, 0.3798000000000683, 0.08019999999999151, 0.11036306619644165, 0.5301394462585449, 0.6451095342636108, 0.006938707143748524, 0.9841165499302994, -0.177300997173009, 0.005552197575213624], [0.6397999999999622, 0.3898000000000672, 0.08019999999999151, 0.11036306619644165, 0.5301394462585449, 0.6451095342636108, 0.006938707143748524, 0.9841165499302994, -0.177300997173009, 0.005552197575213624], [0.6397999999999622, 0.3998000000000661, 0.08019999999999151, 0.11036306619644165, 0.5301394462585449, 0.6451095342636108, 0.006938707143748524, 0.9841165499302994, -0.177300997173009, 0.005552197575213624], [0.6397999999999622, 0.409800000000065, 0.08019999999999151, 0.11036306619644165, 0.5301394462585449, 0.6451095342636108, 0.006938707143748524, 0.9841165499302994, -0.177300997173009, 0.005552197575213624], [0.6397999999999622, 0.4198000000000639, 0.08019999999999151, 0.11036306619644165, 0.5301394462585449, 0.6451095342636108, 0.006938707143748524, 0.9841165499302994, -0.177300997173009, 0.005552197575213624], [0.6397999999999622, 0.4298000000000628, 0.08019999999999151, 0.11036306619644165, 0.5301394462585449, 0.6451095342636108, 0.006938707143748524, 0.9841165499302994, -0.177300997173009, 0.005552197575213624], [0.6397999999999622, 0.4398000000000617, 0.08019999999999151, 0.11036306619644165, 0.5301394462585449, 0.6451095342636108, 0.006938707143748524, 0.9841165499302994, -0.177300997173009, 0.005552197575213624], [0.6397999999999622, 0.4498000000000606, 0.08019999999999151, 0.11036306619644165, 0.5301394462585449, 0.6451095342636108, 0.006938707143748524, 0.9841165499302994, -0.177300997173009, 0.005552197575213624], [0.6397999999999622, 0.4598000000000595, 0.08019999999999151, 0.11036306619644165, 0.5301394462585449, 0.6451095342636108, 0.006938707143748524, 0.9841165499302994, -0.177300997173009, 0.005552197575213624], [0.6397999999999622, 0.4698000000000584, 0.08019999999999151, 0.11036306619644165, 0.5301394462585449, 0.6451095342636108, 0.006938707143748524, 0.9841165499302994, -0.177300997173009, 0.005552197575213624], [0.6397999999999622, 0.4798000000000573, 0.08019999999999151, 0.11036306619644165, 0.5301394462585449, 0.6451095342636108, 0.006938707143748524, 0.9841165499302994, -0.177300997173009, 0.005552197575213624], [0.6397999999999622, 0.4898000000000562, 0.08019999999999151, 0.11036306619644165, 0.5301394462585449, 0.6451095342636108, 0.006938707143748524, 0.9841165499302994, -0.177300997173009, 0.005552197575213624], [0.6397999999999622, 0.4998000000000551, 0.08019999999999151, 0.11036306619644165, 0.5301394462585449, 0.6451095342636108, 0.006938707143748524, 0.9841165499302994, -0.177300997173009, 0.005552197575213624], [0.6397999999999622, 0.509800000000054, 0.08019999999999151, 0.11036306619644165, 0.5301394462585449, 0.6451095342636108, 0.006938707143748524, 0.9841165499302994, -0.177300997173009, 0.005552197575213624], [0.6397999999999622, 0.5198000000000529, 0.08019999999999151, 0.11036306619644165, 0.5301394462585449, 0.6451095342636108, 0.006938707143748524, 0.9841165499302994, -0.177300997173009, 0.005552197575213624], [0.6397999999999622, 0.5298000000000518, 0.08019999999999151, 0.11036306619644165, 0.5301394462585449, 0.6451095342636108, 0.006938707143748524, 0.9841165499302994, -0.177300997173009, 0.005552197575213624], [0.6397999999999622, 0.5398000000000507, 0.08019999999999151, 0.11036306619644165, 0.5301394462585449, 0.6451095342636108, 0.006938707143748524, 0.9841165499302994, -0.177300997173009, 0.005552197575213624], [0.6397999999999622, 0.5498000000000496, 0.08019999999999151, 0.11036306619644165, 0.5301394462585449, 0.6451095342636108, 0.006938707143748524, 0.9841165499302994, -0.177300997173009, 0.005552197575213624], [0.6397999999999622, 0.5598000000000485, 0.08019999999999151, 0.11036306619644165, 0.5301394462585449, 0.6451095342636108, 0.006938707143748524, 0.9841165499302994, -0.177300997173009, 0.005552197575213624], [0.6397999999999622, 0.5698000000000474, 0.08019999999999151, 0.11036306619644165, 0.5301394462585449, 0.6451095342636108, 0.006938707143748524, 0.9841165499302994, -0.177300997173009, 0.005552197575213624], [0.6397999999999622, 0.5798000000000463, 0.08019999999999151, 0.11036306619644165, 0.5301394462585449, 0.6451095342636108, 0.006938707143748524, 0.9841165499302994, -0.177300997173009, 0.005552197575213624], [0.6397999999999622, 0.5898000000000452, 0.08019999999999151, 0.11036306619644165, 0.5301394462585449, 0.6451095342636108, 0.006938707143748524, 0.9841165499302994, -0.177300997173009, 0.005552197575213624], [0.6297999999999633, 0.5898000000000452, 0.08019999999999151, 0.11036306619644165, 0.5301394462585449, 0.6451095342636108, 0.006938707143748524, 0.9841165499302994, -0.177300997173009, 0.005552197575213624], [0.6197999999999644, 0.5898000000000452, 0.08019999999999151, 0.11036306619644165, 0.5301394462585449, 0.6451095342636108, 0.006938707143748524, 0.9841165499302994, -0.177300997173009, 0.005552197575213624], [0.6097999999999655, 0.5898000000000452, 0.08019999999999151, 0.11036306619644165, 0.5301394462585449, 0.6451095342636108, 0.006938707143748524, 0.9841165499302994, -0.177300997173009, 0.005552197575213624], [0.5997999999999666, 0.5898000000000452, 0.08019999999999151, 0.11036306619644165, 0.5301394462585449, 0.6451095342636108, 0.006938707143748524, 0.9841165499302994, -0.177300997173009, 0.005552197575213624], [0.5897999999999677, 0.5898000000000452, 0.08019999999999151, 0.11036306619644165, 0.5301394462585449, 0.6451095342636108, 0.006938707143748524, 0.9841165499302994, -0.177300997173009, 0.005552197575213624], [0.5797999999999688, 0.5898000000000452, 0.08019999999999151, 0.11036306619644165, 0.5301394462585449, 0.6451095342636108, 0.006938707143748524, 0.9841165499302994, -0.177300997173009, 0.005552197575213624], [0.5697999999999699, 0.5898000000000452, 0.08019999999999151, 0.11036306619644165, 0.5301394462585449, 0.6451095342636108, 0.006938707143748524, 0.9841165499302994, -0.177300997173009, 0.005552197575213624], [0.559799999999971, 0.5898000000000452, 0.08019999999999151, 0.11036306619644165, 0.5301394462585449, 0.6451095342636108, 0.006938707143748524, 0.9841165499302994, -0.177300997173009, 0.005552197575213624], [0.5497999999999721, 0.5898000000000452, 0.08019999999999151, 0.11036306619644165, 0.5301394462585449, 0.6451095342636108, 0.006938707143748524, 0.9841165499302994, -0.177300997173009, 0.005552197575213624], [0.5397999999999732, 0.5898000000000452, 0.08019999999999151, 0.11036306619644165, 0.5301394462585449, 0.6451095342636108, 0.006938707143748524, 0.9841165499302994, -0.177300997173009, 0.005552197575213624], [0.5297999999999743, 0.5898000000000452, 0.08019999999999151, 0.11036306619644165, 0.5301394462585449, 0.6451095342636108, 0.006938707143748524, 0.9841165499302994, -0.177300997173009, 0.005552197575213624], [0.5197999999999754, 0.5898000000000452, 0.08019999999999151, 0.11036306619644165, 0.5301394462585449, 0.6451095342636108, 0.006938707143748524, 0.9841165499302994, -0.177300997173009, 0.005552197575213624], [0.5097999999999765, 0.5898000000000452, 0.08019999999999151, 0.11036306619644165, 0.5301394462585449, 0.6451095342636108, 0.006938707143748524, 0.9841165499302994, -0.177300997173009, 0.005552197575213624], [0.4997999999999776, 0.5898000000000452, 0.08019999999999151, 0.11036306619644165, 0.5301394462585449, 0.6451095342636108, 0.006938707143748524, 0.9841165499302994, -0.177300997173009, 0.005552197575213624], [0.4897999999999787, 0.5898000000000452, 0.08019999999999151, 0.11036306619644165, 0.5301394462585449, 0.6451095342636108, 0.006938707143748524, 0.9841165499302994, -0.177300997173009, 0.005552197575213624], [0.4797999999999798, 0.5898000000000452, 0.08019999999999151, 0.11036306619644165, 0.5301394462585449, 0.6451095342636108, 0.006938707143748524, 0.9841165499302994, -0.177300997173009, 0.005552197575213624], [0.4697999999999809, 0.5898000000000452, 0.08019999999999151, 0.11036306619644165, 0.5301394462585449, 0.6451095342636108, 0.006938707143748524, 0.9841165499302994, -0.177300997173009, 0.005552197575213624], [0.459799999999982, 0.5898000000000452, 0.08019999999999151, 0.11036306619644165, 0.5301394462585449, 0.6451095342636108, 0.006938707143748524, 0.9841165499302994, -0.177300997173009, 0.005552197575213624], [0.4497999999999831, 0.5898000000000452, 0.08019999999999151, 0.11036306619644165, 0.5301394462585449, 0.6451095342636108, 0.006938707143748524, 0.9841165499302994, -0.177300997173009, 0.005552197575213624], [0.4397999999999842, 0.5898000000000452, 0.08019999999999151, 0.11041201651096344, 0.5300633907318115, 0.6451177597045898, 0.006597661429200985, 0.9841207289643188, -0.17730081124249586, 0.005223410682340846], [0.4297999999999853, 0.5898000000000452, 0.08019999999999151, 0.11041200906038284, 0.5300633907318115, 0.6451177597045898, 0.006597664188185195, 0.9841207237461073, -0.17730084010469657, 0.005223410654644181], [0.4197999999999864, 0.5898000000000452, 0.08019999999999151, 0.11041202396154404, 0.5300633907318115, 0.6451177597045898, 0.006597654875557444, 0.9841207238353016, -0.17730084012076597, 0.005223405067182165], [0.4097999999999875, 0.5898000000000452, 0.08019999999999151, 0.11041201651096344, 0.5300633907318115, 0.6451177597045898, 0.006597659531903415, 0.9841207237954918, -0.1773008401135938, 0.005223406929616011], [0.3997999999999886, 0.5898000000000452, 0.08019999999999151, 0.10793492943048477, 0.5316933393478394, 0.6453620195388794, 0.009230159344544266, 0.9851113091405151, -0.17149237023962388, 0.007802545195677786], [0.3897999999999897, 0.5898000000000452, 0.08019999999999151, 0.10229185223579407, 0.5332890152931213, 0.6452080607414246, 0.00884987349294197, 0.9872026319038012, -0.15904359848850233, 0.007601123679744904], [0.3797999999999908, 0.5898000000000452, 0.08019999999999151, 0.0963895320892334, 0.5340558290481567, 0.6452072262763977, 0.00878062339151418, 0.9892683180603495, -0.1456392938007473, 0.007764768903409107], [0.3697999999999919, 0.5898000000000452, 0.08019999999999151, 0.09002939611673355, 0.5345155000686646, 0.6452093720436096, 0.00870693623413247, 0.9911106989969092, -0.13251611014182255, 0.007953121912370716], [0.359799999999993, 0.5898000000000452, 0.08019999999999151, 0.08325406163930893, 0.534687340259552, 0.6452726721763611, 0.00883729327845223, 0.9927310320101096, -0.11975788317968664, 0.008065342396579002], [0.3497999999999941, 0.5898000000000452, 0.08019999999999151, 0.07604653388261795, 0.534451961517334, 0.6452025771141052, 0.008555400410659471, 0.9941316022723706, -0.1075228363959871, 0.008246341039775403], [0.3397999999999952, 0.5898000000000452, 0.08019999999999151, 0.0684584304690361, 0.5339013338088989, 0.6451891660690308, 0.008508794119718811, 0.9953127138741751, -0.09597759512520229, 0.008276669440981732], [0.3297999999999963, 0.5898000000000452, 0.08019999999999151, 0.060559943318367004, 0.5330227017402649, 0.6451797485351562, 0.00844583070396295, 0.9963059653655072, -0.08505054994412846, 0.00833638261035654], [0.3197999999999974, 0.5898000000000452, 0.08019999999999151, 0.052419841289520264, 0.5318925380706787, 0.6452382802963257, 0.008589417416965828, 0.9971335121369518, -0.07470632186194211, 0.008363393792257187], [0.3097999999999985, 0.5898000000000452, 0.08019999999999151, 0.04404943063855171, 0.530441164970398, 0.6451655626296997, 0.008306344598416171, 0.9978181272132374, -0.06494107551102538, 0.008523283143924367], [0.2997999999999996, 0.5898000000000452, 0.08019999999999151, 0.03551720827817917, 0.5288205742835999, 0.6451597809791565, 0.0082439627750302, 0.9983738836220284, -0.05574604634017571, 0.008602551753471344], [0.2898000000000007, 0.5898000000000452, 0.08019999999999151, 0.0268686655908823, 0.5270264148712158, 0.6452165246009827, 0.008389626002485912, 0.9988231425002908, -0.04698652199382632, 0.008614576733991334], [0.2798000000000018, 0.5898000000000452, 0.08019999999999151, 0.018118079751729965, 0.5249447822570801, 0.6451637744903564, 0.008196530995823554, 0.9991850418052832, -0.03853726449170812, 0.008772021300991157], [0.2698000000000029, 0.5898000000000452, 0.08019999999999151, 0.00933015812188387, 0.5227145552635193, 0.6451390981674194, 0.008055117922199343, 0.9994702983659298, -0.030266043060830077, 0.00884332499790497], [0.259800000000004, 0.5898000000000452, 0.08019999999999151, 0.0005275479052215815, 0.5203441977500916, 0.6451319456100464, 0.007996737331619224, 0.9996847920631402, -0.022068677606861424, 0.008907422658084032], [0.2498000000000051, 0.5898000000000452, 0.08019999999999151, -0.008281007409095764, 0.5178759098052979, 0.6451946496963501, 0.008167848110095107, 0.9998290684585195, -0.013993591274232907, 0.008905028122878545], [0.23980000000000481, 0.5898000000000452, 0.08019999999999151, -0.01712343655526638, 0.5152376294136047, 0.6451207399368286, 0.007876540129391037, 0.9999091707366314, -0.006132244748620883, 0.009055714588863815], [0.22980000000000453, 0.5898000000000452, 0.08019999999999151, -0.025986285880208015, 0.5124339461326599, 0.6451094150543213, 0.007807936370835756, 0.9999269056815581, 0.0013901889059700094, 0.00912616012018924], [0.21980000000000424, 0.5898000000000452, 0.08019999999999151, -0.03483522683382034, 0.5095438957214355, 0.6451043486595154, 0.007747634117835812, 0.9998886928117068, 0.008825301900572832, 0.009202727814960185], [0.20980000000000396, 0.5898000000000452, 0.08019999999999151, -0.04364703968167305, 0.506640613079071, 0.6450990438461304, 0.007684467636104443, 0.999794517097274, 0.016304402152472645, 0.009275721526045343], [0.19980000000000367, 0.5898000000000452, 0.08019999999999151, -0.05242049694061279, 0.5037642121315002, 0.645167350769043, 0.007879695096026554, 0.9996429304276175, 0.02378386311075911, 0.009287082793199496], [0.18980000000000338, 0.5898000000000452, 0.08019999999999151, -0.06116141378879547, 0.5008516311645508, 0.645164430141449, 0.007815048283039213, 0.999434792745362, 0.031325937056896, 0.009365134162238564], [0.1798000000000031, 0.5898000000000452, 0.08019999999999151, -0.06986832618713379, 0.4979165494441986, 0.645078182220459, 0.007476561342283518, 0.9991690657003781, 0.03892579729469426, 0.009490072860680094], [0.1698000000000028, 0.5898000000000452, 0.08019999999999151, -0.07853507250547409, 0.4950215518474579, 0.6450730562210083, 0.007413505053850759, 0.9988438410202672, 0.04652321302858977, 0.009571407847970616], [0.15980000000000252, 0.5898000000000452, 0.08019999999999151, -0.08716584742069244, 0.49213001132011414, 0.6450690031051636, 0.007345709213648671, 0.9984588888424292, 0.054154665717391144, 0.009651944297788291], [0.14980000000000224, 0.5898000000000452, 0.08019999999999151, -0.0957576259970665, 0.4892442226409912, 0.6450648307800293, 0.0072834905306917086, 0.9980125309218479, 0.06183215902637059, 0.009732574109372038], [0.13980000000000195, 0.5898000000000452, 0.08019999999999151, -0.10431201756000519, 0.48640382289886475, 0.6451413631439209, 0.007485767629764244, 0.9975054001993833, 0.06950932558543187, 0.009766960259964479], [0.12980000000000166, 0.5898000000000452, 0.08019999999999151, -0.11283328384160995, 0.48353251814842224, 0.6451373100280762, 0.00741875558667653, 0.9969368712125567, 0.07723437920923518, 0.009832982794020718], [0.11980000000000138, 0.5898000000000452, 0.08019999999999151, -0.12156536430120468, 0.48107412457466125, 0.6450551748275757, 0.007221239686702158, 0.996403882314399, 0.0838308342215066, 0.009977386426649889], [0.10980000000000109, 0.5898000000000452, 0.08019999999999151, -0.13021409511566162, 0.478595107793808, 0.6450293064117432, 0.00705236600487888, 0.9958153688035043, 0.09057559770767508, 0.009903357429252852], [0.0998000000000008, 0.5898000000000452, 0.08019999999999151, -0.13884566724300385, 0.4761088490486145, 0.6450227499008179, 0.00699324275006113, 0.995171636509448, 0.0973762005089263, 0.010118498771619126], [0.08980000000000052, 0.5898000000000452, 0.08019999999999151, -0.14750023186206818, 0.4737341105937958, 0.6450092196464539, 0.00695209720015009, 0.9945101775698679, 0.1039175395138884, 0.010115336665136433], [0.07980000000000023, 0.5898000000000452, 0.08019999999999151, -0.1561587154865265, 0.4714414179325104, 0.6450042128562927, 0.006882973847461483, 0.9938241619903108, 0.11029469061787882, 0.010061855533547171], [0.06979999999999995, 0.5898000000000452, 0.08019999999999151, -0.1647777110338211, 0.46908628940582275, 0.6449936032295227, 0.0068198136306454465, 0.9930735402825663, 0.11684471571611196, 0.010283294312341585], [0.059799999999999756, 0.5898000000000452, 0.08019999999999151, -0.17334070801734924, 0.46675771474838257, 0.6450868844985962, 0.007066489952448173, 0.9922719408246271, 0.12345308571130105, 0.010285708543301205], [0.04979999999999982, 0.5898000000000452, 0.08019999999999151, -0.1818254142999649, 0.46432071924209595, 0.6450727581977844, 0.007015133692387622, 0.9913924924058428, 0.13033849773482148, 0.010177912793828814], [0.03979999999999988, 0.5898000000000452, 0.08019999999999151, -0.19013357162475586, 0.461623877286911, 0.6449775099754333, 0.006640010779591858, 0.9903673828211599, 0.1379231471120912, 0.01027437548027355], [0.029799999999999938, 0.5898000000000452, 0.08019999999999151, -0.19836962223052979, 0.45891398191452026, 0.6449683308601379, 0.006567904722613338, 0.9892541060185128, 0.14569284472232993, 0.010333022296619641], [0.019799999999999998, 0.5898000000000452, 0.08019999999999151, -0.206559956073761, 0.45617935061454773, 0.6449621319770813, 0.006517197771517173, 0.9880581247604852, 0.1535765340724988, 0.010626213355625285], [0.009800000000000007, 0.5898000000000452, 0.08019999999999151, -0.21465763449668884, 0.4533993899822235, 0.644962728023529, 0.0064093163470410565, 0.9867701445516168, 0.16164912657968628, 0.010637779917318912], [-0.00019999999999999258, 0.5898000000000452, 0.08019999999999151, -0.22274132072925568, 0.45065274834632874, 0.6449396014213562, 0.0063766725356097795, 0.9854285120152827, 0.1696437746146738, 0.010534490457800059], [-0.010199999999999994, 0.5898000000000452, 0.08019999999999151, -0.23078463971614838, 0.4479461908340454, 0.6449331641197205, 0.006272799191105663, 0.9840215948665461, 0.1776288093726196, 0.010495661364242037], [-0.020199999999999982, 0.5898000000000452, 0.08019999999999151, -0.23881036043167114, 0.44518670439720154, 0.6449266076087952, 0.006229986709727382, 0.9825696641430715, 0.18547622286081455, 0.010798755699340476], [-0.03019999999999992, 0.5898000000000452, 0.08019999999999151, -0.24674676358699799, 0.4424078166484833, 0.6449272036552429, 0.0061288054738222, 0.9810363305065154, 0.19342673634247662, 0.010782098018157436], [-0.04019999999999986, 0.5898000000000452, 0.08019999999999151, -0.25462406873703003, 0.43953999876976013, 0.6449092626571655, 0.006036520577739343, 0.9794942752010466, 0.20109907090605691, 0.010662501977101215], [-0.0501999999999998, 0.5898000000000452, 0.08019999999999151, -0.26249346137046814, 0.4366420805454254, 0.6449039578437805, 0.006008383083888817, 0.9779333793283693, 0.20854368000367499, 0.010942506963112572], [-0.06019999999999974, 0.5898000000000452, 0.08019999999999151, -0.2702586352825165, 0.43375205993652344, 0.6450113654136658, 0.006044028263505039, 0.9763281995222456, 0.2159458393543336, 0.010682275298476663], [-0.07019999999999994, 0.5898000000000452, 0.08019999999999151, -0.2780272662639618, 0.4307019114494324, 0.6448792219161987, 0.005844950623455428, 0.9748206051036474, 0.22265612879044813, 0.010717869639968743], [-0.08020000000000023, 0.5898000000000452, 0.08019999999999151, -0.2857625186443329, 0.42763787508010864, 0.6448617577552795, 0.005833407970867442, 0.9733147203461033, 0.22913937690522224, 0.010934919319255504], [-0.09020000000000052, 0.5898000000000452, 0.08019999999999151, -0.29337871074676514, 0.4245619773864746, 0.6448577046394348, 0.0057457099966198005, 0.9717606130872533, 0.2356490608290259, 0.010854390785221666], [-0.1002000000000008, 0.5898000000000452, 0.08019999999999151, -0.3009289503097534, 0.4214695394039154, 0.6448535323143005, 0.005648131724071975, 0.9701627312137324, 0.24214703881132527, 0.01082520978296569], [-0.11020000000000109, 0.5898000000000452, 0.08019999999999151, -0.3084428906440735, 0.4183511435985565, 0.6448401212692261, 0.0056371603342515115, 0.9685306260217708, 0.24858524654012773, 0.011046451187000109], [-0.12020000000000138, 0.5898000000000452, 0.08019999999999151, -0.3158346116542816, 0.4152352809906006, 0.6448360085487366, 0.005548647233856857, 0.966840083321633, 0.25508676253732954, 0.010964003589747615], [-0.13020000000000165, 0.5898000000000452, 0.08019999999999151, -0.32315438985824585, 0.4121110737323761, 0.6448318362236023, 0.005452929904642811, 0.9651003318348141, 0.26159530440016493, 0.010932143594546289], [-0.14020000000000193, 0.5898000000000452, 0.08019999999999151, -0.3304286301136017, 0.40895962715148926, 0.6448144316673279, 0.005430670988252941, 0.9633224496268389, 0.26805997909697377, 0.011145109424927838], [-0.15020000000000222, 0.5898000000000452, 0.08019999999999151, -0.33757442235946655, 0.4058202803134918, 0.6448136568069458, 0.005347147466656174, 0.9614806319081632, 0.2745977340774957, 0.011067380853382896], [-0.1602000000000025, 0.5898000000000452, 0.08019999999999151, -0.3446442484855652, 0.40268152952194214, 0.6448090672492981, 0.005250780861974327, 0.9595822130184234, 0.2811630080263483, 0.011034884529531868], [-0.1602000000000025, 0.5798000000000463, 0.08019999999999151, -0.3489846885204315, 0.3996279537677765, 0.6447876691818237, 0.005196810872652591, 0.9591080601658577, 0.2827759821719859, 0.01106643521230474], [-0.1602000000000025, 0.5698000000000474, 0.08019999999999151, -0.3534322679042816, 0.3965488076210022, 0.6447901129722595, 0.005178879314480604, 0.9587884833441727, 0.28386085313843046, 0.010992700812329125], [-0.1602000000000025, 0.5598000000000485, 0.08019999999999151, -0.3579563498497009, 0.3934158384799957, 0.6447829604148865, 0.005194217862176085, 0.9586551386781852, 0.2843055066325954, 0.011123132881207231], [-0.1602000000000025, 0.5498000000000496, 0.08019999999999151, -0.3624868392944336, 0.3902477025985718, 0.6447855234146118, 0.0051954789208651, 0.9587072752479776, 0.2841331369367576, 0.011033035840558283], [-0.1602000000000025, 0.5398000000000507, 0.08019999999999151, -0.3670447766780853, 0.3870670795440674, 0.6447727680206299, 0.005212841469791195, 0.9589333712099153, 0.2833648322329674, 0.01113497720606708], [-0.1602000000000025, 0.5298000000000518, 0.08019999999999151, -0.37156063318252563, 0.38389351963996887, 0.6447749733924866, 0.005230259420531012, 0.9593327025022471, 0.28201347005325933, 0.011036892889223781], [-0.1602000000000025, 0.5198000000000529, 0.08019999999999151, -0.3760659098625183, 0.3807489573955536, 0.6447665691375732, 0.005261963105119968, 0.9598798264506289, 0.28014126238430626, 0.0111312006144132], [-0.1602000000000025, 0.509800000000054, 0.08019999999999151, -0.3804883658885956, 0.3776445686817169, 0.6447685360908508, 0.005301413829906582, 0.9605772678729962, 0.27774416207395947, 0.011017617296311677], [-0.1602000000000025, 0.4998000000000551, 0.08019999999999151, -0.38486817479133606, 0.37459465861320496, 0.644755482673645, 0.005323002951262939, 0.961388009862154, 0.2749212690726271, 0.011093058386387142], [-0.1602000000000025, 0.4898000000000562, 0.08019999999999151, -0.3891369104385376, 0.3716169595718384, 0.6447606086730957, 0.005384444388441228, 0.9623187179289571, 0.2716491350725312, 0.010974529445125548], [-0.1602000000000025, 0.4798000000000573, 0.08019999999999151, -0.39334091544151306, 0.36871272325515747, 0.6447462439537048, 0.005407966807109101, 0.963328183175465, 0.2680446937074441, 0.011027582244244598], [-0.1602000000000025, 0.4698000000000584, 0.08019999999999151, -0.39741310477256775, 0.36590030789375305, 0.6447510719299316, 0.005477734400993815, 0.9644253298390439, 0.26407343270905687, 0.010908699644720014], [-0.1602000000000025, 0.4598000000000595, 0.08019999999999151, -0.40140557289123535, 0.363174706697464, 0.6447365880012512, 0.005502456460415775, 0.9655700702554281, 0.25985439793302995, 0.010947797709647685], [-0.1602000000000025, 0.4498000000000606, 0.08019999999999151, -0.40525129437446594, 0.3605518937110901, 0.64473956823349, 0.005576364452270818, 0.9667734081148329, 0.255344767137656, 0.010822726871845219], [-0.1602000000000025, 0.4398000000000617, 0.08019999999999151, -0.4090089201927185, 0.35802558064460754, 0.6447262763977051, 0.005602671898375659, 0.9679964624056226, 0.2506664663438096, 0.010852718023931378], [-0.1602000000000025, 0.4298000000000628, 0.08019999999999151, -0.41260862350463867, 0.3556053042411804, 0.6447267532348633, 0.005676973225743808, 0.9692542690028355, 0.24576205362760536, 0.01072133347653962], [-0.1602000000000025, 0.4198000000000639, 0.08019999999999151, -0.4161233901977539, 0.35334014892578125, 0.6447239518165588, 0.005726888116703349, 0.9705279334737955, 0.24068207692658722, 0.010717786426641566], [-0.1602000000000025, 0.409800000000065, 0.08019999999999151, -0.41955894231796265, 0.35131099820137024, 0.6447128653526306, 0.005756057321190183, 0.9718486240526427, 0.23528874284698179, 0.010785509750915736], [-0.1602000000000025, 0.3998000000000661, 0.08019999999999151, -0.42284977436065674, 0.3495181202888489, 0.6447176933288574, 0.005842072358050045, 0.9732056747045995, 0.22961564104619195, 0.010641536556087693], [-0.1602000000000025, 0.3898000000000672, 0.08019999999999151, -0.4260238707065582, 0.347840279340744, 0.6447140574455261, 0.00590384244842512, 0.974531165543149, 0.22392423383924753, 0.010587234245136414]]
