# Supplementary material
Source: ML conference proceedings conference paper supplement (https://proceedings.neurips.cc/paper_files/paper/2021/hash/0e9b734aa25ca8096cb7b56dc0dd8929-Abstract.html)
Supplement: Supplementary file 1 [file 0e9b734aa25ca8096cb7b56dc0dd8929-Supplemental.zip › l2e/gym-physx/tests/expected_rewards.json]

{
    "expected_rewards":[
        [0.0, 0.0, 0.0, 0.0, 0.0, 0.0, 0.0, 0.0, 0.0, 0.0, 0.0, 0.0, 0.0, 0.0, 0.0, 0.0, 0.0, 0.0, 0.0, 0.0, 0.0, 0.0, 0.0, 0.0, 0.0, 0.0, 0.0, 0.0, 0.0, 0.0, 0.0, 0.0, 0.0, 0.0, 0.0, 0.0, 0.0, 0.0, 0.0, 0.0, 0.0, 0.0, 0.0, 0.0, 0.0, 0.0, 0.0, 0.0, 0.0, 0.0, 0.0, 0.0, 0.0, 0.0, 0.0, 0.0, 0.0, 0.0, 0.0, 0.0, 0.0, 0.0, 0.0, 0.0, 0.0, 0.0, 0.0, 0.0, 0.0, 0.0, 0.0, 0.0, 0.0, 0.0, 0.0, 0.0, 0.0, 0.0, 0.0, 0.0, 0.0, 0.0, 0.0, 0.0, 0.0, 0.0, 1.0, 1.0, 1.0],
        [0.0, 0.0, 0.0, 0.0, 0.0, 0.0, 0.0, 0.0, 0.0, 0.0, 0.0, 0.0, 0.0, 0.0001957512218301392, 0.00011495186093911127, 0.0001873957291258057, 0.0002829396380769397, 0.00044366946156492045, 0.0006774287290461077, 0.0031262195999082203, 0.005494033816599008, 0.009474815726235524, 0.015222325715330269, 0.023298543402705513, 0.034780408922883074, 0.0476148741077169, 0.06203828654821972, 0.07965427123893731, 0.10228982799351014, 0.12944169517228157, 0.1558922784031825, 0.17672002994686367, 0.1968959529538933, 0.20500593300331357, 0.19992204922586929, 0.18235517065200063, 0.15490326269957508, 0.12201738084810237, 0.0922006166154026, 0.06459578951066264, 0.043191589131803806, 0.02665083401863488, 0.015368639635030504, 0.008290548514022134, 0.004185211690841889, 0.0019769173488303196, 0.0008749619201024735, 0.0003627057077718095, 0.00014301599263175435, 5.201804520965816e-05, 1.771165632447208e-05, 5.639224218114973e-06, 1.6793455139885878e-06, 8.928664829798224e-07, 4.677554007925823e-07, 2.466336096529165e-07, 1.2920383840530682e-07, 6.437752116875712e-08, 3.2671561737516734e-08, 1.5767207684568204e-08, 7.284057452108854e-09, 3.200851160216705e-09, 1.3738946747223491e-09, 6.204059592112196e-09, 2.6298802391832315e-08, 1.0472617463087762e-07, 3.920447534312653e-07, 1.3789837718980124e-06, 4.556461596293285e-06, 1.4162145351230783e-05, 4.100805578841943e-05, 0.00011295418242992965, 0.00029271058851405103, 0.0007132441978645411, 0.0016359327796243944, 0.0035347125446821737, 0.007199129794739318, 0.013824673010682003, 0.02504149914337185, 0.042810190386891246, 0.06910276802681092, 0.10536932077062953, 0.15185579863943663, 0.20696105478253815, 0.26690638413647166, 0.32596340296308796, 1.0, 1.0, 1.0],
        [0.0, 0.0, 0.0, 0.0, 0.0, 0.0, 0.0, 0.0, 0.0, 0.0, 0.0, 0.0, 0.0, 0.00017617609964712527, -7.271942480192514e-05, 6.519948136802499e-05, 8.598951805602063e-05, 0.00014465684113918267, 0.0002103833407330685, 0.0022038771482349798, 0.002133039310616878, 0.0035797112038685555, 0.005175113219454284, 0.007269566474311263, 0.010327013429488373, 0.011554400110361646, 0.012982241800855186, 0.015854384958961517, 0.020373104103527873, 0.024434494990095125, 0.02378915537279445, 0.018729718635716305, 0.01818264401156576, 0.007316609990887843, -0.004591305462446563, -0.015877304093437853, -0.024818269186430365, -0.029285127832033478, -0.02695567844005378, -0.024805614335237078, -0.019355025683802228, -0.014855272729246317, -0.010141337051337965, -0.006365575148773378, -0.0036947289381427445, -0.0019882359337834465, -0.0009926968893409138, -0.0004615964716102546, -0.00020002756765448958, -8.08139344595115e-05, -3.04353494690105e-05, -1.07077044522361e-05, -3.5142329673483732e-06, -6.903799583778722e-07, -3.889631702144553e-07, -1.9236744904879723e-07, -1.0751371217150873e-07, -5.6486813722643914e-08, -2.8991044638081515e-08, -1.4743118840534019e-08, -7.648899797166512e-09, -3.658073799557018e-09, -1.6466338126582398e-09, 4.335965267277583e-09, 1.8038858095733306e-08, 7.040003084198256e-08, 2.5790288937123696e-07, 8.715775208298179e-07, 2.8261127484020095e-06, 8.561468571467471e-06, 2.435700348299637e-05, 6.48410345095364e-05, 0.0001619701367670347, 0.000378856903761544, 0.000831084443984163, 0.0017099878152975543, 0.003299519263056897, 0.00596493712695429, 0.01009713484337338, 0.015993209284795196, 0.02366322869109748, 0.03263727615403997, 0.04183225847776509, 0.04958605503457073, 0.05394074941405667, 0.053141331745063185, 1.0462051418698397, 1.033305038325611, 1.000353233403195]
    ]
}
