# Supplementary material
Source: ML conference proceedings conference paper supplement (https://proceedings.neurips.cc/paper_files/paper/2021/hash/0e9b734aa25ca8096cb7b56dc0dd8929-Abstract.html)
Supplement: Supplementary file 1 [file 0e9b734aa25ca8096cb7b56dc0dd8929-Supplemental.zip › l2e/gym-physx/tests/fixed_reset.json]

{
    "None": [
        0.0,
        0.0,
        0.0,
        0.0,
        0.0,
        0.0,
        0.0,
        0.0,
        0.0,
        0.0,
        0.0,
        0.0,
        0.0,
        0.0,
        0.0,
        0.0,
        0.0,
        0.0,
        0.0,
        1.0,
        1.0
    ],
    "relaxed": [
        0.00989584785588548,
        0.01819132356049504,
        0.09664608701813684,
        0.11356243091757431,
        0.13122194724572606,
        0.14854348410500473,
        0.1746108965363321,
        0.19226118295019876,
        0.20975941740990478,
        0.22721296062254645,
        0.24466385516305525,
        0.26214547777694625,
        0.2796378272480998,
        0.2971455464565358,
        0.3146642875701638,
        0.3321401646589778,
        0.3495114667530036,
        0.3666366891321953,
        0.39379212793406476,
        1.0,
        1.0
    ],
    "potential_based": [
        0.008906263070296933,
        0.006476343348560062,
        0.06879015475582811,
        0.005560100807680032,
        0.004537321603579156,
        0.002467188448778218,
        0.008606322777694159,
        -0.0015758318811532335,
        -0.0034777072812844645,
        -0.005267752849612922,
        -0.007015490975796734,
        -0.00873292516380364,
        -0.010471433253656404,
        -0.012206835437217567,
        -0.013947687643388496,
        -0.015738139377083737,
        -0.01757984458127454,
        -0.019538446534027865,
        -0.012223773991536957,
        0.9772611149135033,
        0.9751898554281171
    ],
    "reference_plan": [
        -0.7799999853805172,
        -0.08899167852845816,
        0.14233853131187268,
        -0.5,
        0.0,
        0.65,
        -0.7665305880915427,
        -0.07775972759504793,
        0.14448300832250557,
        -0.49999999999999556,
        -2.416881579922452e-16,
        0.65,
        -0.7599999797591543,
        -0.06640912970623128,
        0.14640304441040394,
        -0.4999999999999855,
        2.4821024686782363e-16,
        0.65,
        -0.759931873054547,
        -0.05496284275010051,
        0.14809327217594298,
        -0.49993372974238487,
        1.5513010473756002e-07,
        0.65,
        -0.7576838216288126,
        -0.04402787276745254,
        0.14918926612245945,
        -0.4977468112420545,
        5.2744235151757125e-06,
        0.65,
        -0.7533740246821048,
        -0.033746974256876006,
        0.1498332429732674,
        -0.49348559777214546,
        2.777946396997657e-05,
        0.65,
        -0.7470524979728662,
        -0.024118880581517146,
        0.15008264439279018,
        -0.48719836785254245,
        6.87052407577084e-05,
        0.65,
        -0.7361800395903092,
        -0.01616083867110954,
        0.15005468078029596,
        -0.47630085965307495,
        0.00017058653138285132,
        0.65,
        -0.7221198771934073,
        -0.009557524304466498,
        0.15002462266675026,
        -0.4622017052839262,
        0.00031154654642281075,
        0.65,
        -0.7051798379414558,
        -0.00418406668828345,
        0.1499957339845838,
        -0.44521433073246347,
        0.0004844850956572846,
        0.65,
        -0.6829293755078646,
        -0.0011269736226456324,
        0.14999397278185259,
        -0.4229358313976183,
        0.0006892604911487811,
        0.65,
        -0.6571843697567077,
        0.0008068599342954384,
        0.14999547561680082,
        -0.3971765927643735,
        0.0008918196850657924,
        0.65,
        -0.6285140958139299,
        0.001902022776192915,
        0.14999894724215435,
        -0.368502014147517,
        0.0010892961518254806,
        0.65,
        -0.5951036628659299,
        0.0022101833687577645,
        0.15000131082038162,
        -0.33509420459318423,
        0.0012603666966143354,
        0.65,
        -0.5707950321974018,
        0.0023541999391411494,
        0.15000212186976844,
        -0.31078736617833425,
        0.0013627768178491645,
        0.65,
        -0.5516874314028578,
        0.0024044199254208394,
        0.15000204575981782,
        -0.2916810827003316,
        0.0014259524113388355,
        0.65,
        -0.5325798306083137,
        0.002454639911700529,
        0.15000196964986728,
        -0.27257479922232897,
        0.0014891280048285069,
        0.65,
        -0.5121209484698829,
        0.002502231234841319,
        0.15000165828481174,
        -0.2521169053502998,
        0.0015350178861033251,
        0.65,
        -0.4909864256595089,
        0.002548508226412658,
        0.1500012292922037,
        -0.23098320628125743,
        0.0015722649112707167,
        0.65,
        -0.4698519028491348,
        0.0025947852179839972,
        0.15000080029959564,
        -0.209849507212215,
        0.0016095119364381086,
        0.65,
        -0.4476052303473593,
        0.002639976009014648,
        0.15000032177516612,
        -0.18760346369038233,
        0.0016280749718069194,
        0.65,
        -0.4248750145014962,
        0.0026846945389406513,
        0.14999982171516205,
        -0.16487379214559728,
        0.0016385145333502602,
        0.65,
        -0.40214479865563313,
        0.002729413068866655,
        0.14999932165515797,
        -0.14214412060081227,
        0.001648954094893601,
        0.65,
        -0.37858844574861555,
        0.0027648090445617775,
        0.1499992232690945,
        -0.11858822315246388,
        0.001640814949790377,
        0.65,
        -0.354722291443665,
        0.002796709062420319,
        0.14999927551075876,
        -0.09472249099027924,
        0.001625708789694691,
        0.65,
        -0.33085613713871453,
        0.002828609080278861,
        0.14999932775242297,
        -0.07085675882809458,
        0.0016106026295990051,
        0.65,
        -0.30647786293425894,
        0.0028420651357702327,
        0.1499998234867032,
        -0.04647885823250823,
        0.0015783638708664711,
        0.65,
        -0.28193571036196163,
        0.00284961912330411,
        0.15000046113862056,
        -0.021937063738233203,
        0.0015406426805701454,
        0.65,
        -0.2573935577896644,
        0.002857173110837987,
        0.15000109879053788,
        0.0026047307560417635,
        0.0015029214902738198,
        0.65,
        -0.2326585183292431,
        0.0028408550354662473,
        0.15000188737096234,
        0.027339466346289955,
        0.00145066312730905,
        0.65,
        -0.20787154778355782,
        0.0028181098662353027,
        0.15000271658598485,
        0.05212614761622311,
        0.001394490910164315,
        0.65,
        -0.1830845772378724,
        0.0027953646970043586,
        0.1500035458010074,
        0.0769128288861564,
        0.0013383186930195797,
        0.65,
        -0.1584023414924473,
        0.0027449315217025457,
        0.15000430631346126,
        0.10159485855019744,
        0.001271121523543132,
        0.65,
        -0.13374338014708007,
        0.0026883454561627625,
        0.15000505155867766,
        0.126253632301818,
        0.0012014743646596372,
        0.65,
        -0.10908441880171275,
        0.0026317593906229793,
        0.1500057968038941,
        0.1509124060534386,
        0.0011318272057761424,
        0.65,
        -0.08477518548044033,
        0.002543777413260873,
        0.15000629672766466,
        0.1752215748175613,
        0.0010553243622358273,
        0.65,
        -0.060528403592041834,
        0.002450189023073352,
        0.1500067528440342,
        0.1994683141196309,
        0.0009775972892925083,
        0.65,
        -0.03628162170364334,
        0.0023566006328858305,
        0.15000720896040376,
        0.22371505342170053,
        0.0008998702163491894,
        0.65,
        -0.012541583853231519,
        0.0022261208331153756,
        0.15000725403364656,
        0.24745521131629422,
        0.0008198438774867031,
        0.65,
        0.011128558267802667,
        0.002090552563057621,
        0.15000724241128569,
        0.2711254959133048,
        0.0007395003984974356,
        0.65,
        0.03479870038883693,
        0.0019549842929998656,
        0.15000723078892475,
        0.2947957805103155,
        0.0006591569195081678,
        0.65,
        0.05793280377949192,
        0.0017723134606034822,
        0.15000661343485733,
        0.3179302406048244,
        0.0005811929860014029,
        0.65,
        0.08101330329710899,
        0.001584932371973236,
        0.15000593550761923,
        0.34101111824908303,
        0.0005034670070428884,
        0.65,
        0.10409380281472605,
        0.0013975512833429894,
        0.15000525758038116,
        0.36409199589334174,
        0.0004257410280843738,
        0.65,
        0.1267806981122367,
        0.001142837970303135,
        0.15000368423518648,
        0.3867797406010999,
        0.0003546760194254445,
        0.65,
        0.14944219958909544,
        0.0008837806427852396,
        0.1500020531210914,
        0.4094421218936001,
        0.0002840407507858428,
        0.65,
        0.17210370106595424,
        0.0006247233152673435,
        0.1500004220069964,
        0.4321045031861004,
        0.0002134054821462409,
        0.65,
        0.19473568062664304,
        0.0002615941970732484,
        0.14999728041206947,
        0.4547369589072414,
        0.00014228052057154968,
        0.65,
        0.2173667376274515,
        -0.00010478716457947864,
        0.14999409161461658,
        0.4773684794542774,
        7.11402560926369e-05,
        0.65,
        0.23999779462825996,
        -0.0004711685262322057,
        0.14999090281716365,
        0.5000000000013134,
        -8.386275899521962e-12,
        0.65
    ]
}
