# Supplementary material
Source: ML conference proceedings conference paper supplement (https://proceedings.neurips.cc/paper_files/paper/2021/hash/0e9b734aa25ca8096cb7b56dc0dd8929-Abstract.html)
Supplement: Supplementary file 1 [file 0e9b734aa25ca8096cb7b56dc0dd8929-Supplemental.zip › l2e/l2e/992.py]

# %%
"""
Evaluations for 2D maze world with moving obstacles
"""
import os
import json

import pickle
import torch
import gym
import numpy as np

from stable_baselines3 import DDPG, SAC, TD3, PPO

# %%
# parameters
with open("config_" + os.environ["CONFIG_ID"] + ".json", 'r') as config_data:
    config = json.load(config_data)
try:
    scratch_dir = os.path.join(
        config["scratch_root"],
        os.environ["CONFIG_ID"]
    )
    print(f'Scratch directory: {scratch_dir}')
except NameError:
    scratch_dir = None
    print('Running in interactive mode: No data is saved')
if scratch_dir is not None:
    assert os.path.isdir(scratch_dir), "Scratch dir does not exist"

device = torch.device("cuda" if torch.cuda.is_available() else "cpu")
print(f'PyTorch runs on device "{device}"')

# %%
# create env
env = gym.make(
    'gym_obstacles:obstacles-v0',
    plan_or_goal=config["plan_or_goal"],
    plan_length=config["plan_length"],
    n_boxes=config["n_boxes"],
    planner_tolerance=config["planner_tolerance"]
)

# The environment does not have a time limit itself, but
# this can be provided using the TimeLimit wrapper
env = gym.wrappers.TimeLimit(
    env, max_episode_steps=config["max_episode_steps"])

# %%
# select agent class (.load() is a class method and instantiates the agent)
if config['model_class'] == 'DDPG':
    AgentClass = DDPG
elif config['model_class'] == 'SAC':
    AgentClass = SAC
elif config['model_class'] == 'TD3':
    AgentClass = TD3
elif config['model_class'] == 'PPO':
    AgentClass = PPO
    assert config[
        'fixed_initial_config'
    ] is not None, "PPO can not be used for plan-conditioned policy"
else:
    raise Exception(f"Unknown model_class: {config['model_class']}")

# %%
eval_epochs = config["eval_epochs"]
for train_epoch in np.arange(config["total_timesteps"]//config["save_interval"])[1:]:
    filename = os.environ["SLURM_ARRAY_TASK_ID"].zfill(
        config["file_string_digits"]
    ) + "_" + str(train_epoch * config["save_interval"]) + '_steps'
    eval_filename = filename + '_evaluation.pkl'

    if os.path.isfile(os.path.join(scratch_dir, eval_filename)):
        # don't load and evaluate model if this has been done already
        print(f"Not loading {filename} since it has been evaluated already")
        continue

    # AgentClass.load is a class method that instantiates new model
    try:
        model = AgentClass.load(os.path.join(scratch_dir, filename), env=env, device=device)
    except FileNotFoundError:
        print(f"Not loading {filename} since it does not exist (yet).")
        continue

    print(f"Loading {filename} and saving results to {eval_filename}")

    successes = []
    final_distances = []
    rollout_steps = []

    for eval_epoch in range(eval_epochs):
        obs = env.reset()
        for timestep in range(config["max_episode_steps"]):
            action, _ = model.predict(obs, deterministic=config["eval_deterministic"])
            obs, reward, done, info = env.step(action)

            if done or info['is_success']:
                # break current rollout loop in this case
                final_distance = np.linalg.norm(
                    env.state - env.current_target,
                    axis=-1
                )
                print(f"Model {filename}, test rollout {eval_epoch} of {eval_epochs}: Success={info['is_success']}, Final distance={final_distance}, Ended after {timestep} steps")
                successes.append(info['is_success'])
                final_distances.append(final_distance)
                rollout_steps.append(timestep)
                break


    assert len(successes) == eval_epochs
    assert len(final_distances) == eval_epochs
    assert len(rollout_steps) == eval_epochs

    with open(os.path.join(scratch_dir, eval_filename), 'wb') as results_file:
        pickle.dump({
            "successes": successes,
            "final_distances": final_distances,
            "rollout_steps": rollout_steps
        }, results_file)

# %%
