# Supplementary material
Source: ML conference proceedings conference paper supplement (https://proceedings.neurips.cc/paper_files/paper/2021/hash/0e9b734aa25ca8096cb7b56dc0dd8929-Abstract.html)
Supplement: Supplementary file 1 [file 0e9b734aa25ca8096cb7b56dc0dd8929-Supplemental.zip › l2e/l2e/config_im_plan_obstacle_training.json]

{
    "description": "Obstacle Pushing: Inverse Model Plan Execution - Model Training",
    "scratch_root": "/scratch/l2e/",
    "file_string_digits": 10,
    "EVAL_SCRIPT_ID": "995",
    "AGENTS_MIN": 1,
    "AGENTS_MAX": 10,
    "EVAL_NUM_CPU": 2,
    "EVAL_MEMORY": "10G",
    "EVAL_GPU": "",
    "EVAL_TIME": "20:00:00",
    "EVAL_PARTITION": "standard",
    "shaping_mode": "relaxed",
    "shaping_function_width": 0.5,
    "potential_function": "gaussian",
    "drift": false,
    "max_episode_steps": 250,
    "action_uncertainty": 0.5,
    "config_files": "pushing",
    "fixed_initial_config": null,
    "fixed_finger_initial_position": true,
    "plan_encoding": null,
    "komo_plans": false,
    "n_keyframes": 0,
    "eval_epochs": 30,
    "plan_length": 100,
    "plan_dim": 6,
    "DATA_COLLECTION_SCRIPT_ID": "010",
    "DATA_COLLECTION_NUM_CPU": 2,
    "DATA_COLLECTION_MEMORY": "10G",
    "DATA_COLLECTION_GPU": "",
    "DATA_COLLECTION_TIME": "5:00:00",
    "DATA_COLLECTION_PARTITION": "standard",
    "n_data_collect_workers": 250,
    "n_rollouts_total": 410000,
    "rollout_duration": 250,
    "random_ratio": 0.9,
    "finger_box_relative_z": 0.51,
    "IMITATION_LEARNING_SCRIPT_ID": "011",
    "IMITATION_LEARNING_NUM_CPU": 2,
    "IMITATION_LEARNING_MEMORY": "10G",
    "IMITATION_LEARNING_GPU": "gpu:tesla:1",
    "IMITATION_LEARNING_TIME": "24:00:00",
    "IMITATION_LEARNING_PARTITION": "gpu_short",
    "n_training_workers": 10,
    "imitation_batch_size": 20,
    "imitation_n_epochs": 1,
    "file_steps": 10,
    "model_hidden_dims": [400, 200, 100, 50, 25]
}
