# Supplementary material
Source: ML conference proceedings conference paper supplement (https://proceedings.neurips.cc/paper_files/paper/2021/hash/0e9b734aa25ca8096cb7b56dc0dd8929-Abstract.html)
Supplement: Supplementary file 1 [file 0e9b734aa25ca8096cb7b56dc0dd8929-Supplemental.zip › l2e/l2e/config_l2e_1_1000_basic.json]

{
    "description": "Basic Pushing: L2E S^biased_1_1000",
    "scratch_root": "/scratch/l2e/",
    "file_string_digits": 10,
    "SCRIPT_ID": "009",
    "AGENTS_MIN": 1,
    "AGENTS_MAX": 10,
    "NUM_CPU": 2,
    "MEMORY": "50G",
    "TIME": "336:00:00",
    "PARTITION": "standard",
    "GPU": "",
    "shaping_mode": "relaxed",
    "shaping_function_width": 0.5,
    "potential_function": "gaussian",
    "drift": true,
    "max_episode_steps": 250,
    "action_noise": {
        "type": "NormalActionNoise",
        "sigma": 0.1
    },
    "action_uncertainty": 0.1,
    "config_files": "pushing",
    "fixed_initial_config": null,
    "fixed_finger_initial_position": true,
    "plans_from_disk": null,
    "plan_encoding": {
        "config_encoding": true,
        "vae_encoding": null,
        "reward_model_encoding": null
    },
    "learning_starts": 5e3,
    "komo_plans": false,
    "n_keyframes": 0,
    "policy": "MlpPolicy",
    "policy_kwargs": {
        "net_arch": {
            "pi": [1024, 512, 256, 128, 64, 32],
            "qf": [1024, 512, 256, 128, 64, 32]
        }
    },
    "gamma": 0.9,
    "model_class": "SAC",
    "n_sampled_goals": 1,
    "n_sampled_goal_preselection": 1000,
    "use_sde": true,
    "total_timesteps": 10000000,
    "save_interval": 50000,
    "pickup_checkpoint": false,
    "goal_selection_strategy": "past_desired_success",
    "eval_epochs": 30,
    "eval_deterministic": true,
    "EVAL_SCRIPT_ID": "997",
    "EVAL_NUM_CPU": 2,
    "EVAL_MEMORY": "10G",
    "EVAL_GPU": "",
    "EVAL_TIME": "20:00:00",
    "EVAL_PARTITION": "standard",
    "PLAN_COLLECTING_SCRIPT_ID": "501",
    "PLAN_COLLECTING_NUM_CPU": 1,
    "PLAN_COLLECTING_MEMORY": "1G",
    "PLAN_COLLECTING_GPU": "",
    "PLAN_COLLECTING_TIME": "120:00:00",
    "PLAN_COLLECTING_PARTITION": "standard",
    "num_plans": 10000000,
    "num_plan_workers": 1000,
    "num_plans_per_file": 1000,
    "plan_length": 50,
    "plan_dim": 6,
    "ENCODER_TRAINING_SCRIPT_ID": "701",
    "ENCODER_TRAINING_NUM_CPU": 2,
    "ENCODER_TRAINING_MEMORY": "10G",
    "ENCODER_TRAINING_GPU": "gpu:tesla:1",
    "ENCODER_TRAINING_TIME": "24:00:00",
    "ENCODER_TRAINING_PARTITION": "gpu_short",
    "ENCODER_EVAL_SCRIPT_ID": "801",
    "ENCODER_EVAL_NUM_CPU": 2,
    "ENCODER_EVAL_MEMORY": "10G",
    "ENCODER_EVAL_GPU": "",
    "ENCODER_EVAL_TIME": "10:00:00",
    "ENCODER_EVAL_PARTITION": "standard",
    "encoder_training_workers": 5,
    "encoder_configs": {
        "1":{
            "vae_training_n_epochs": 10,
            "vae_training_batch_size": 20,
            "vae_bottleneck_dim": 4,
            "vae_layer_dims": [200, 100, 50],
            "vae_log_std_clips": [-4, 15],
            "vae_eval_n_plans": 100
        }
    }
}
