# Supplementary material
Source: ML conference proceedings conference paper supplement (https://proceedings.neurips.cc/paper_files/paper/2021/hash/0e9b734aa25ca8096cb7b56dc0dd8929-Abstract.html)
Supplement: Supplementary file 1 [file 0e9b734aa25ca8096cb7b56dc0dd8929-Supplemental.zip › l2e/l2e/config_l2e_2dmaze.json]

{
    "description": "2D maze world with moving obstacles: L2E",
    "scratch_root": "/scratch/l2e/",
    "file_string_digits": 10,
    "SCRIPT_ID": "012",
    "AGENTS_MIN": 1,
    "AGENTS_MAX": 10,
    "NUM_CPU": 2,
    "MEMORY": "50G",
    "TIME": "336:00:00",
    "PARTITION": "standard",
    "GPU": "",
    "plan_or_goal": "plan",
    "plan_length": 20,
    "n_boxes": 3,
    "planner_tolerance": 0.05,
    "model_class": "SAC",
    "max_episode_steps": 250,
    "action_noise": {
        "type": "NormalActionNoise",
        "sigma": 0.1
    },
    "goal_selection_strategy": "past_desired_success",
    "n_sampled_goals": 100,
    "n_sampled_goal_preselection": 1000,
    "learning_starts": 5e3,
    "policy_kwargs": {
        "net_arch": {
            "pi": [512, 256, 128, 64, 32],
            "qf": [512, 256, 128, 64, 32]
        }
    },
    "gamma": 0.8,
    "use_sde": true,
    "policy": "MlpPolicy",
    "total_timesteps": 100000000,
    "save_interval": 250000,
    "pickup_checkpoint": false,
    "EVAL_SCRIPT_ID": "992",
    "EVAL_NUM_CPU": 2,
    "EVAL_MEMORY": "10G",
    "EVAL_GPU": "",
    "EVAL_TIME": "20:00:00",
    "EVAL_PARTITION": "standard",
    "eval_epochs": 30,
    "eval_deterministic": true
}
