# Supplementary material
Source: ML conference proceedings conference paper supplement (https://proceedings.neurips.cc/paper_files/paper/2021/hash/0e9b734aa25ca8096cb7b56dc0dd8929-Abstract.html)
Supplement: Supplementary file 1 [file 0e9b734aa25ca8096cb7b56dc0dd8929-Supplemental.zip › l2e/l2e/plot_results.json]

{
    "direct_comparisons": {
        "plot_ids": {
            "figure1b": {
                "comparisons": [
                    {
                        "legend": "L2E $S^\\mathrm{bias}_{100, 1000}$",
                        "CONFIG_ID": "l2e_100_1000_basic",
                        "style": ""
                    },
                    {
                        "legend": "L2E $S^\\mathrm{bias}_{10, 1000}$",
                        "CONFIG_ID": "l2e_10_1000_basic",
                        "style": ""
                    },
                    {
                        "legend": "HER Fu 1",
                        "CONFIG_ID": "her_fu_1_basic",
                        "style": ""
                    },
                    {
                        "legend": "HER Ep 1",
                        "CONFIG_ID": "her_ep_1_basic",
                        "style": ""
                    },
                    {
                        "legend": "Plan",
                        "CONFIG_ID": "plan_basic",
                        "style": ""
                    },
                    {
                        "legend": "Plan + IM",
                        "CONFIG_ID": "im_plan_basic",
                        "style": ""
                    },
                    {
                        "legend": "Planned Subgoals + RL",
                        "CONFIG_ID": "subgoals_basic",
                        "style": ""
                    }
                ],
                "style": {
                    "legend-loc": "best",
                    "figsize": [5.33, 4],
                    "ncol": 2,
                    "x_max": 6000000
                },
                "save": true
            },
            "figure1d": {
                "comparisons": [
                    {
                        "legend": "L2E $S^\\mathrm{bias}_{100, 1000}$",
                        "CONFIG_ID": "l2e_100_1000_obstacle",
                        "style": ""
                    },
                    {
                        "legend": "L2E $S^\\mathrm{bias}_{10, 1000}$",
                        "CONFIG_ID": "l2e_10_1000_obstacle",
                        "style": ""
                    },
                    {
                        "legend": "HER Fu 5",
                        "CONFIG_ID": "her_fu_5_obstacle",
                        "style": ""
                    },
                    {
                        "legend": "HER Ep 5",
                        "CONFIG_ID": "her_ep_5_obstacle",
                        "style": ""
                    },
                    {
                        "legend": "Plan",
                        "CONFIG_ID": "plan_obstacle",
                        "style": ""
                    },
                    {
                        "legend": "Plan + IM",
                        "CONFIG_ID": "im_plan_obstacle_evaluation",
                        "style": ""
                    },
                    {
                        "legend": "Planned Subgoals + RL",
                        "CONFIG_ID": "subgoals_obstacle",
                        "style": ""
                    }
                ],
                "style": {
                    "legend-loc": "best",
                    "figsize": [5.33, 4],
                    "x_max": 50000000
                },
                "save": true
            },
            "figure2d": {
                "comparisons": [
                    {
                        "legend": "L2E",
                        "CONFIG_ID": "l2e_2dmaze",
                        "style": ""
                    },
                    {
                        "legend": "HER",
                        "CONFIG_ID": "her_2dmaze",
                        "style": ""
                    }
                ],
                "style": {
                    "legend-loc": "best",
                    "figsize": [5.33, 4],
                    "ncol": 2,
                    "x_max": 30000000
                },
                "save": true
            },
            "figure3a": {
                "comparisons": [
                    {
                        "legend": "HER Ep 1",
                        "CONFIG_ID": "her_ep_1_basic",
                        "style": ""
                    },
                    {
                        "legend": "HER Ep 5",
                        "CONFIG_ID": "her_ep_5_basic",
                        "style": ""
                    },
                    {
                        "legend": "HER Ep 10",
                        "CONFIG_ID": "her_ep_10_basic",
                        "style": ""
                    },
                    {
                        "legend": "HER Fi",
                        "CONFIG_ID": "her_fi_5_basic",
                        "style": ""
                    },
                    {
                        "legend": "HER Fu 1",
                        "CONFIG_ID": "her_fu_1_basic",
                        "style": ""
                    },
                    {
                        "legend": "HER Fu 5",
                        "CONFIG_ID": "her_fu_5_basic",
                        "style": ""
                    },
                    {
                        "legend": "HER Fu 10",
                        "CONFIG_ID": "her_fu_10_basic",
                        "style": ""
                    }
                ],
                "style": {
                    "legend-loc": "upper left",
                    "figsize": [5.33, 4],
                    "ncol": 2,
                    "x_max": 6000000
                },
                "save": true
            },
            "figure3b": {
                "comparisons": [
                    {
                        "legend": "L2E $S^\\mathrm{bias}_{1, 1000}$",
                        "CONFIG_ID": "l2e_1_1000_basic",
                        "style": ""
                    },
                    {
                        "legend": "L2E $S^\\mathrm{bias}_{10, 1000}$",
                        "CONFIG_ID": "l2e_10_1000_basic",
                        "style": ""
                    },
                    {
                        "legend": "L2E $S^\\mathrm{bias}_{100, 1000}$",
                        "CONFIG_ID": "l2e_100_1000_basic",
                        "style": ""
                    },
                    {
                        "legend": "L2E $S^\\mathrm{bias}_{10, 100}$",
                        "CONFIG_ID": "l2e_10_100_basic",
                        "style": ""
                    },
                    {
                        "legend": "L2E $S^\\mathrm{bias}_{10, 10000}$",
                        "CONFIG_ID": "l2e_10_10000_basic",
                        "style": ""
                    },
                    {
                        "legend": "L2E $S^\\mathrm{uni}_{1000}$",
                        "CONFIG_ID": "l2e_1000_basic",
                        "style": ""
                    }
                ],
                "style": {
                    "legend-loc": "best",
                    "figsize": [5.33, 4],
                    "x_max": 6000000,
                    "ncol": 2
                },
                "save": true
            },
            "figure5a": {
                "comparisons": [
                    {
                        "legend": "Analytical encoding",
                        "CONFIG_ID": "l2e_10_1000_basic",
                        "style": ""
                    },
                    {
                        "legend": "VAE encoding",
                        "CONFIG_ID": "l2e_10_1000_basic_vae_encoding",
                        "style": ""
                    },
                    {
                        "legend": "No encoding",
                        "CONFIG_ID": "l2e_10_1000_basic_no_encoding",
                        "style": ""
                    }
                ],
                "style": {
                    "legend-loc": "best",
                    "figsize": [5.33, 4],
                    "ncol": 1,
                    "x_max": 6500000
                },
                "save": true
            },
            "figure5b": {
                "comparisons": [
                    {
                        "legend": "Plans contain 50 states",
                        "CONFIG_ID": "l2e_10_1000_basic",
                        "style": ""
                    },
                    {
                        "legend": "Plans contain 12 states",
                        "CONFIG_ID": "l2e_10_1000_basic_low_density",
                        "style": ""
                    },
                    {
                        "legend": "Plans contain 3 states",
                        "CONFIG_ID": "l2e_10_1000_basic_very_low_density",
                        "style": ""
                    }
                ],
                "style": {
                    "legend-loc": "best",
                    "figsize": [5.33, 4],
                    "ncol": 1,
                    "x_max": 6500000
                },
                "save": true
            },
            "figure6": {
                "comparisons": [
                    {
                        "legend": "L2E $S^\\mathrm{bias}_{100, 1000}$",
                        "CONFIG_ID": "l2e_100_1000_basic",
                        "style": ""
                    }
                ],
                "style": {
                    "legend-loc": "best",
                    "figsize": [5.33, 4],
                    "ncol": 2,
                    "x_max": 30000000
                },
                "save": true
            }
        }
    },
    "save_dir": "figs",
    "scratch_root": "/scratch/l2e"
}
