# Supplementary material
Source: ML conference proceedings conference paper supplement (https://proceedings.neurips.cc/paper_files/paper/2021/hash/0e9b734aa25ca8096cb7b56dc0dd8929-Abstract.html)
Supplement: Supplementary file 1 [file 0e9b734aa25ca8096cb7b56dc0dd8929-Supplemental.zip › l2e/rai-python/config.mk]

# In this file you can unset dependencies, e.g.
# 
# LAPACK=0 #to avoid need to include/link to LAPACK
# PHYSX=0 #to avoid linking to Physx (Nvidia simulator)
# GTK = 0 #to avoid linking to GTK
# etc
#

# only UNCOMMENT some of the following lines
# (they are already set =1 in the components that refer to them)

OPTIM = fast_debug
FCL = 0
ODE = 0
PHYSX = 1
BULLET = 0
G4 = 0
PCL = 0
OPENCV = 0
GTK = 0
ROS = 0
CERES = 0
ROS_VERSION = kinetic

ifeq ($(OUTPUT),x.exe)
PHYSX = 1
endif
