# Supplementary material
Source: ML conference proceedings conference paper supplement (https://proceedings.neurips.cc/paper_files/paper/2021/hash/0e9b734aa25ca8096cb7b56dc0dd8929-Abstract.html)
Supplement: Supplementary file 1 [file 0e9b734aa25ca8096cb7b56dc0dd8929-Supplemental.zip › l2e/rai-python/docs/5-cgo-optimization.ipynb]

# %% [markdown]
# Constrained Graph Optimization (KOMO)

This is a dense optimization problem (in constrast to a path (k-order Markov) optimization). You can define arbitrary objectives across configurations.

# %% [code]
import sys
sys.path.append('../rai/rai/ry')
import numpy as np
import libry as ry

C = ry.Config()
D = C.view()
C.addFile('../rai-robotModels/pr2/pr2.g')
C.addFile('../test/kitchen.g')

# %% [markdown]
Let's add some objects

# %% [code]
C.addObject(name='item1', parent='sink1', shape=ry.ST.ssBox, pos=[-.1, -.1, .52], size=[.1, .1, .25, .02], color=[1., 0., 0.])
C.addObject('item2', 'sink1', ry.ST.ssBox, [.1, .1, .25, .02], [1., 1., 0.], [.1, .1, .52])
C.addObject('tray', 'stove1', ry.ST.ssBox, [.2, .2, .05, .02], [0., 1., 0.], [.0, .0, .42])

# %% [code]
obj1 = "item2";
obj2 = "item1";
tray = "tray";
arm = "pr2L";
table = "_12";

komo = C.komo_CGO(6, True)

komo.activateCollisionPairs([(obj1, obj2)]);
komo.addObjective([], ry.OT.eq, ry.FS.accumulatedCollisions);
komo.addObjective([], ry.OT.ineq, ry.FS.jointLimits);

komo.add_StableRelativePose([0, 1], arm, obj1);
komo.add_StableRelativePose([2, 3], arm, obj2);
komo.add_StableRelativePose([4, 5], arm, tray);

komo.add_StableRelativePose([1,2,3,4,5], tray, obj1);
komo.add_StableRelativePose([3,4,5], tray, obj2);

komo.add_StablePose([-1,0], obj1);
komo.add_StablePose([-1,0,1,2], obj2);
komo.add_StablePose([-1,0,1,2,3,4], tray);

komo.add_grasp(0, arm, obj1);
komo.add_place(1, obj1, tray);

komo.add_grasp(2, arm, obj2);
komo.add_place(3, obj2, tray);

komo.add_grasp(4, arm, tray);
komo.add_place(5, tray, table);

# %% [code]
komo.optimize(True)

# %% [code]
V = komo.view()

# %% [code]
V = 0

# %% [markdown]
Best way to read out: grab a configuration into K and analyze it there:

# %% [code]
C.setFrameState( komo.getConfiguration(4) )
C.getJointState()
