# Supplementary material
Source: ML conference proceedings conference paper supplement (https://proceedings.neurips.cc/paper_files/paper/2021/hash/0e9b734aa25ca8096cb7b56dc0dd8929-Abstract.html)
Supplement: Supplementary file 1 [file 0e9b734aa25ca8096cb7b56dc0dd8929-Supplemental.zip › l2e/rai-python/docs/9-robotModels.ipynb]

# %% [code]
# let's have a look at all robot models in rai-robotModels
import sys
sys.path.append('../rai/rai/ry')
import numpy as np
import libry as ry

# %% [code]
D = 0
C = ry.Config()
C.addFile('../rai-robotModels/pr2/pr2.g')
D = C.view()

# %% [code]
D = 0
C = ry.Config()
C.addFile('../rai-robotModels/panda/panda.g')
D = C.view()

# %% [code]
D = 0
C = ry.Config()
C.addFile('../rai-robotModels/baxter/baxter_new.g')
D = C.view()

# %% [code]
D = 0
C = ry.Config()
C.addFile('../rai-robotModels/kuka_drake/setup.g')
D = C.view()

# %% [code]
D = 0
C = ry.Config()
C.addFile('../rai-robotModels/objects/kitchen.g')
C.addFile('../rai-robotModels/objects/shelf.g')
C.addFile('../rai-robotModels/human_simple/human_simple.g')
D = C.view()

# %% [code]
D = 0
C = ry.Config()
print('press ENTER in the window to animate; edit the file externally autoupdates the window; press Q in window to escape')
C.edit('../rai-robotModels/panda/panda.g')
D = C.view()

# %% [code]
D = 0
C = ry.Config()
print("this will fail if you haven't called 'make -C ../rai-robotModels/bremenKitchen' to wget the binary mesh files")
C.addFile('../rai-robotModels/bremenKitchen/bremenKitchen.g')
D = C.view()

# %% [code]
D = 0

# %% [code]
