# Supplementary material
Source: ML conference proceedings conference paper supplement (https://proceedings.neurips.cc/paper_files/paper/2021/hash/0e9b734aa25ca8096cb7b56dc0dd8929-Abstract.html)
Supplement: Supplementary file 1 [file 0e9b734aa25ca8096cb7b56dc0dd8929-Supplemental.zip › l2e/rai-python/docs/broken-6-KOMO-physics.ipynb]

# %% [code]
import sys
sys.path.append('../rai/rai/ry')
import numpy as np
import libry as ry

# %% [code]
# load and display a configuration
C = ry.Config()
C.addFile('../test/boxProblem.g')
D = C.view()
C.getFrameNames()

# %% [code]
# create a standard path optimization problem with 4 phases, each of .2 seconds, and 10 steps
komo = C.komo_path(5., 10, .2, False)

# %% [code]
# create tau-DOFs (time intervals) in the optimization problem and add respective constraints
komo.addTimeOptimization()

# %% [code]
# take one object, and first 'switch' it to become freely movable without costs,
# then, starting at phase .7, make it dynamic (imposing NE equations)
obj = 'ballR'
#komo.addSwitch_magic(.0, 'base', obj)
komo.makeObjectsFree(["ballR"]);

# %% [code]
# (old) a way to constrain the object position to be 'before' the box before phase 0.2
#komo.addObjective(time=[0., .2], type=OT.ineq, feature=FS.position, frames=[obj], scaleTrans=[[0.,1.,0.]], target=[1.])

# %% [code]
# objectives for collision (permanent) and target (at phase-time 4.)
komo.addObjective(type=ry.OT.sos, feature=ry.FS.accumulatedCollisions)
komo.addObjective(time=[5.], type=ry.OT.eq, feature=ry.FS.distance, frames=['target', obj], scale=[3e1])

# %% [code]
# simple structure of this solution: bounce on the bottom of the box at times 1, 2, and 3
komo.addSwitch_dynamicTrans(1., -1., 'base', obj)
komo.addInteraction_elasticBounce(2., "boxBo", obj, .8)
komo.addInteraction_elasticBounce(3., "boxBo", obj, .8)
komo.addInteraction_elasticBounce(4., "boxBo", obj, .8)

# %% [code]
komo.optimize(True)

# %% [code]
komoView = komo.view()

# %% [code]
komo.display()

# %% [code]
# read out solution: the full frame path, the tau path (time optimization), list of interaction forces
obj_path = komo.getPathFrames([obj])
tau_path = komo.getPathTau()
forces = komo.getForceInteractions()
forces

# %% [markdown]
Conversion from steps to phase and time:
```
phase=0 is the FIXED initial configuration and corresponds to step=-1
step=0 is the first configuration s.t. optimization
\tau(s) gives the time between step s-1 and step s
phase(step s) = (s+1)/stepsPerPhase
time(step s) = sum i=0:s tau(i)
```

# %% [code]
D=0
komoView=0
komo=0
C=0

# %% [code]
