# Supplementary material
Source: ML conference proceedings conference paper supplement (https://proceedings.neurips.cc/paper_files/paper/2021/hash/0e9b734aa25ca8096cb7b56dc0dd8929-Abstract.html)
Supplement: Supplementary file 1 [file 0e9b734aa25ca8096cb7b56dc0dd8929-Supplemental.zip › l2e/rai-python/docs/broken-6-KOMO-skeleton.ipynb]

# %% [code]
import sys
sys.path.append('../rai/rai/ry')
import numpy as np
import libry as ry

# %% [code]
C = ry.Config()
C.addFile('../test/boxProblem.g')

# %% [code]
komo = C.komo_path(4., 10, .2, False)
komo.addTimeOptimization()

obj = 'ballR'
S = [
    [0., .5], ry.SY.magic, [obj],
    [.7, 4.], ry.SY.dynamicTrans, [obj],
    [1., 1.], ry.SY.bounce, ["boxBo", obj],
    [2., 2.], ry.SY.bounce, ["boxBo", obj],
    [3., 3.], ry.SY.bounce, ["boxBo", obj],
    [4., 4.], ry.SY.touch, ["target", obj]
]
komo.addSkeleton(S)

# %% [code]
komo.optimize(True)
komoView = komo.view()

# %% [code]
# read out solution: the full frame path, the tau path (time optimization), list of interaction forces
obj_path = komo.getPathFrames([obj])
tau_path = komo.getPathTau()
forces = komo.getForceInteractions()
forces

# %% [code]
D=0
komoView=0
komo=0
C=0

# %% [code]
C = ry.Config()
C.addFile("../rai-robotModels/pr2/pr2.g")
C.addFile("../models/tables.g")

C.addFrame("obj0", "table1", "type:ssBox size:[.1 .1 .2 .02] color:[1. 0. 0.], contact, logical={ object }, joint:rigid, Q:<t(0 0 .15)>" )
C.addFrame("obj1", "table1", "type:ssBox size:[.1 .1 .2 .02] color:[1. 0. 0.], contact, logical={ object }, joint:rigid, Q:<t(0 .2 .15)>" )
C.addFrame("obj2", "table1", "type:ssBox size:[.1 .1 .2 .02] color:[1. 0. 0.], contact, logical={ object }, joint:rigid, Q:<t(0 .4 .15)>" )
C.addFrame("obj3", "table1", "type:ssBox size:[.1 .1 .2 .02] color:[1. 0. 0.], contact, logical={ object }, joint:rigid, Q:<t(0 .6.15)>" )
C.addFrame("tray", "table2", "type:ssBox size:[.15 .15 .04 .02] color:[0. 1. 0.], logical={ table }, Q:<t(0 0 .07)>" );
C.addFrame("", "tray", "type:ssBox size:[.27 .27 .04 .02] color:[0. 1. 0.]" )

# %% [code]
S =[
    [1., 1.], ry.SY.touch, ['pr2R', 'obj0'],
    [1., 2.], ry.SY.stable, ['pr2R', 'obj0'],
    [2.,2.], ry.SY.touch, ['pr2L', 'obj3'],
    [2.,3.], ry.SY.stable, ['pr2L', 'obj3'],
    [3.,3.], ry.SY.touch, ['pr2R', 'obj0'],
    [3.,3.], ry.SY.above, ['obj0', 'tray'],
    [3.,3.], ry.SY.stableOn, ['tray', 'obj0']
]

# %% [code]
komo = C.komo_path(3., 10, 10., True)
komo.addSkeletonBound(S, ry.BT.seq, True)
komo.optimize(True)
komoView = komo.view()

# %% [code]
komo = C.komo_path(3., 10, 10., True)
komo.addSkeletonBound(S, ry.BT.path, True)
komo.optimize(True)
komoView = komo.view()

# %% [code]
D=0
komoView=0
komo=0
C=0

# %% [code]
C = ry.Config()
C.addFile("../models/RSSproblem-01.g")

# %% [code]
S =[
  [1, 1], ry.SY.touch, ['baxterR', 'stick'], 
[1, 4], ry.SY.stable, ['baxterR', 'stick'], 
[1, 1], ry.SY.liftDownUp, ['baxterR'], 
[2, 2], ry.SY.touch, ['baxterL', 'stick'], 
[2, 4], ry.SY.stable, ['baxterL', 'stick'], 
[3, 3], ry.SY.touch, ['stickTip', 'redBall'], 
[3, 3], ry.SY.impulse, ['stickTip', 'redBall'],
[3, 3], ry.SY.dynamicOn, ['table1', 'redBall'], 
[4, 4], ry.SY.touch, ['baxterR', 'redBall'], 
#[4, 5], ry.SY.stable, ['baxterR', 'redBall'], 
[4, 5], ry.SY.graspSlide, ['baxterR', 'redBall', 'table1']
]

# %% [code]
komo = C.komo_path(4., 10, 10., False)
komo.addSkeletonBound(S, ry.BT.path, False)
komo.optimize(True)
komoView = komo.view()

# %% [code]
