# Supplementary material
Source: ML conference proceedings conference paper supplement (https://proceedings.neurips.cc/paper_files/paper/2021/hash/0e9b734aa25ca8096cb7b56dc0dd8929-Abstract.html)
Supplement: Supplementary file 1 [file 0e9b734aa25ca8096cb7b56dc0dd8929-Supplemental.zip › l2e/rai-python/docs/lgp1-pickAndPlace.ipynb]

# %% [code]
import sys
sys.path.append('../rai/rai/ry')
import numpy as np
import libry as ry

# %% [code]
K = ry.Config()
K.addFile("../rai-robotModels/pr2/pr2.g")
K.addFile("../models/tables.g")

K.addFrame("obj0", "table1", "type:ssBox size:[.1 .1 .2 .02] color:[1. 0. 0.], contact, logical={ object }, joint:rigid, Q:<t(0 0 .15)>" )
K.addFrame("obj1", "table1", "type:ssBox size:[.1 .1 .2 .02] color:[1. 0. 0.], contact, logical={ object }, joint:rigid, Q:<t(0 .2 .15)>" )
K.addFrame("obj2", "table1", "type:ssBox size:[.1 .1 .2 .02] color:[1. 0. 0.], contact, logical={ object }, joint:rigid, Q:<t(0 .4 .15)>" )
K.addFrame("obj3", "table1", "type:ssBox size:[.1 .1 .2 .02] color:[1. 0. 0.], contact, logical={ object }, joint:rigid, Q:<t(0 .6.15)>" )
K.addFrame("tray", "table2", "type:ssBox size:[.15 .15 .04 .02] color:[0. 1. 0.], logical={ table }, Q:<t(0 0 .07)>" );
K.addFrame("", "tray", "type:ssBox size:[.27 .27 .04 .02] color:[0. 1. 0.]" )
V = K.view()

# %% [code]
lgp = K.lgp("../models/fol-pickAndPlace.g")
lgp.nodeInfo()
# this writes the initial state, which is important to check:
# do the grippers have the gripper predicate, do all objects have the object predicate, and tables the table predicate? These need to be set using a 'logical' attribute in the g-file
# the on predicate should automatically be generated based on the configuration

# %% [code]
lgp.getDecisions()
# This is also useful to check: inspect all decisions possible in this node, which expands the node.
# If there is no good decisions, the FOL rules are buggy

# %% [code]
lgp.walkToDecision(3)
lgp.nodeInfo()
# Using getDecisions and walkToDecision and walkToParent, you can walk to anywhere in the tree by hand

# %% [code]
lgp.viewTree()

# %% [code]
lgp.walkToNode("(grasp pr2R obj0) (grasp pr2L obj1) (place pr2R obj0 tray)")
lgp.nodeInfo()

# %% [code]
# at a node, you can compute bounds, namely BT.seq (just key frames), BT.path (the full path),
# and BT.setPath (also the full path, but seeded with the BT.seq result)
lgp.optBound(ry.BT.seq, True)
lgp.nodeInfo()

# %% [code]
komo = lgp.getKOMOforBound(ry.BT.seq)
komo.display()

# %% [code]
komo = 0

# %% [code]
lgp.optBound(ry.BT.path, True)
lgp.nodeInfo()

# %% [code]
lgp.viewTree()

# %% [code]
# finally, the full multi-bound tree search (MBTS)
# you typically want to add termination rules, i.e., symbolic goals
print("THIS RUNS A THREAD. CHECK THE CONSOLE FOR OUTPUT. THIS IS GENERATING LOTS OF FILES.")
lgp.addTerminalRule("(on obj0 tray) (on obj1 tray) (on obj2 tray)")
lgp.run(2)

# %% [code]
# wait until you have some number of solutions found (repeat executing this line...)
lgp.numSolutions()

# %% [code]
# query the optimization features of the 0. solution
lgp.getReport(0, ry.BT.seqPath)

# %% [code]
# get the KOMO object for the seqPath computation of the 0. solution
komo = lgp.getKOMO(0, ry.BT.seqPath)

# %% [code]
komo.displayTrajectory() #SOOO SLOOOW (TODO: add parameter for display speed)

# %% [code]
# assign K to the 20. configuration of the 0. solution, check display
# you can now query anything (joint state, frame state, features)
X = komo.getConfiguration(20)
K.setFrameState(X) 

# %% [code]
lgp.stop() #stops the thread... takes a while to finish the current job

# %% [code]
lgp.run(2) #will continue where it stopped

# %% [code]
komo=0
lgp=0

# %% [code]


# %% [code]
import sys
sys.path.append('../rai/rai/ry')
import numpy as np
import libry as ry

C = ry.Config()
D = C.view()

C.addFile('../test/lgp-example.g');

lgp = C.lgp("../test/fol.g");

# %% [code]
lgp.walkToNode("(grasp baxterR stick) (push stickTip redBall table1) (grasp baxterL redBall) ");
print(lgp.nodeInfo())

# %% [code]
lgp.optBound(BT.pose, True);

# %% [code]
komo = lgp.getKOMOforBound(BT.path)
komo.display()

input("Press Enter to continue...")

# %% [code]
