# Supplementary material
Source: ML conference proceedings conference paper supplement (https://proceedings.neurips.cc/paper_files/paper/2021/hash/0e9b734aa25ca8096cb7b56dc0dd8929-Abstract.html)
Supplement: Supplementary file 1 [file 0e9b734aa25ca8096cb7b56dc0dd8929-Supplemental.zip › l2e/rai-python/docs/rai.cfg]

#LGP/stepsPerPhase = 20

LGP/cameraFocus = [1 .5 1]
LGP/collisions = 1
LGP/stopTime = 300
LGP/stopSol = 6

#opt/damping =   .1
opt/maxStep=1e-1
