# Supplementary material
Source: ML conference proceedings conference paper supplement (https://proceedings.neurips.cc/paper_files/paper/2021/hash/0e9b734aa25ca8096cb7b56dc0dd8929-Abstract.html)
Supplement: Supplementary file 1 [file 0e9b734aa25ca8096cb7b56dc0dd8929-Supplemental.zip › l2e/rai-python/docs/sim1-physics.ipynb]

# %% [code]
import sys
sys.path.append('../rai/rai/ry')
import numpy as np
import libry as ry
from time import sleep

# %% [code]
C = ry.Config()
D = C.view()

# %% [code]
C.addFrame('world')
block = C.addObject(name='block', shape=ry.ST.ssBox, size=[.2,.3,.5,.02], pos=[.0,.0,.5], color=[1,0,0])
block.setMass(1.);
C.addObject('finger', shape=ry.ST.ssBox, size=[.3, .1, .1, .02], color=[1.,1.,1.,.3], parent='world', pos=[1., 0., .45])

# %% [code]
# this fails, if the lib was not compiled with bullet (comment #BULLET=0 in config.mk)
P=C.physx()
#P=C.bullet()

# %% [code]
x = C.getFrameState('finger')
for i in range(1,100):
    x[0] -= .01
    C.setFrameState(x, ['finger'])
    P.step(C)
    sleep(0.01)

# %% [code]
V = P.getState(C)
X = C.getFrameState()

# %% [code]
#run this cell multiple times! It resets bullet always to the same state
C.setFrameState(X)
x = C.getFrameState('finger')
P.setState(C,V)
for i in range(1,100):
    x[0] -= .01
    C.setFrameState(x, ['finger'])
    P.step(C)
    sleep(0.01)

# %% [code]
P=0
D=0
C=0

# %% [code]
