# Supplementary material
Source: ML conference proceedings conference paper supplement (https://proceedings.neurips.cc/paper_files/paper/2021/hash/0e9b734aa25ca8096cb7b56dc0dd8929-Abstract.html)
Supplement: Supplementary file 1 [file 0e9b734aa25ca8096cb7b56dc0dd8929-Supplemental.zip › l2e/rai-python/Makefile]

BASE = rai

target: build bin

DEPEND = Core Algo Geo Plot Kin Gui Optim KOMO LGP RosCom Operate Perception ry

build: $(DEPEND:%=inPath_makeLib/%)

bin:
	+make -C rai bin

installUbuntuAll: $(DEPEND:%=inPath_installUbuntu/%)

printUbuntuAll: $(DEPEND:%=inPath_printUbuntu/%) printUbuntu

clean: $(DEPEND:%=inPath_clean/%)

dependAll: cleanLocks cleanDepends $(DEPEND:%=inPath_depend/%)

include $(BASE)/build/generic.mk

.NOTPARALLEL:
