# Supplementary material
Source: ML conference proceedings conference paper supplement (https://proceedings.neurips.cc/paper_files/paper/2021/hash/0e9b734aa25ca8096cb7b56dc0dd8929-Abstract.html)
Supplement: Supplementary file 1 [file 0e9b734aa25ca8096cb7b56dc0dd8929-Supplemental.zip › l2e/rai-python/models/tables.g]

#Edit worldTranslationRotation { ctrl_H=1 }

Frame table1{ shape:ssBox, X=<T t(0 2. .6) d(90 0 0 1)>, size=[.8 2.2 .1 .02], color=[.3 .3 .3] fixed, contact, logical={  } }

Frame table2{ shape:ssBox, X=<T t(2. 0 .6)>, size=[.8 2.2 .1 .02], color=[.3 .3 .3] fixed, contact, logical={ table } }

Frame table3{ shape:ssBox, X=<T t(0 -2. .6) d(90 0 0 1)>, size=[.8 2.2 .1 .02], color=[.3 .3 .3] fixed, contact, logical={     } }
