# Supplementary material
Source: ML conference proceedings conference paper supplement (https://proceedings.neurips.cc/paper_files/paper/2021/hash/0e9b734aa25ca8096cb7b56dc0dd8929-Abstract.html)
Supplement: Supplementary file 1 [file 0e9b734aa25ca8096cb7b56dc0dd8929-Supplemental.zip › l2e/rai-python/pybind11/pybind11/__init__.py]

from ._version import version_info, __version__  # noqa: F401 imported but unused


def get_include(user=False):
    import os
    d = os.path.dirname(__file__)
    if os.path.exists(os.path.join(d, "include")):
        # Package is installed
        return os.path.join(d, "include")
    else:
        # Package is from a source directory
        return os.path.join(os.path.dirname(d), "include")
