# Supplementary material
Source: ML conference proceedings conference paper supplement (https://proceedings.neurips.cc/paper_files/paper/2021/hash/0e9b734aa25ca8096cb7b56dc0dd8929-Abstract.html)
Supplement: Supplementary file 1 [file 0e9b734aa25ca8096cb7b56dc0dd8929-Supplemental.zip › l2e/rai-python/pybind11/setup.cfg]

[bdist_wheel]
universal=1

[flake8]
max-line-length = 99
show_source = True
exclude = .git, __pycache__, build, dist, docs, tools, venv
ignore =
    # required for pretty matrix formatting: multiple spaces after `,` and `[`
    E201, E241, W504,
    # camelcase 'cPickle' imported as lowercase 'pickle'
    N813
