# Supplementary material
Source: ML conference proceedings conference paper supplement (https://proceedings.neurips.cc/paper_files/paper/2021/hash/0e9b734aa25ca8096cb7b56dc0dd8929-Abstract.html)
Supplement: Supplementary file 1 [file 0e9b734aa25ca8096cb7b56dc0dd8929-Supplemental.zip › l2e/rai-python/pybind11/tests/CMakeLists.txt]

# CMakeLists.txt -- Build system for the pybind11 test suite
#
# Copyright (c) 2015 Wenzel Jakob <wenzel@inf.ethz.ch>
#
# All rights reserved. Use of this source code is governed by a
# BSD-style license that can be found in the LICENSE file.

cmake_minimum_required(VERSION 2.8.12)

option(PYBIND11_WERROR  "Report all warnings as errors"  OFF)

if (CMAKE_CURRENT_SOURCE_DIR STREQUAL CMAKE_SOURCE_DIR)
    # We're being loaded directly, i.e. not via add_subdirectory, so make this
    # work as its own project and load the pybind11Config to get the tools we need
    project(pybind11_tests CXX)

    find_package(pybind11 REQUIRED CONFIG)
endif()

if(NOT CMAKE_BUILD_TYPE AND NOT CMAKE_CONFIGURATION_TYPES)
  message(STATUS "Setting tests build type to MinSizeRel as none was specified")
  set(CMAKE_BUILD_TYPE MinSizeRel CACHE STRING "Choose the type of build." FORCE)
  set_property(CACHE CMAKE_BUILD_TYPE PROPERTY STRINGS "Debug" "Release"
    "MinSizeRel" "RelWithDebInfo")
endif()

# Full set of test files (you can override these; see below)
set(PYBIND11_TEST_FILES
  test_async.cpp
  test_buffers.cpp
  test_builtin_casters.cpp
  test_call_policies.cpp
  test_callbacks.cpp
  test_chrono.cpp
  test_class.cpp
  test_constants_and_functions.cpp
  test_copy_move.cpp
  test_docstring_options.cpp
  test_eigen.cpp
  test_enum.cpp
  test_eval.cpp
  test_exceptions.cpp
  test_factory_constructors.cpp
  test_gil_scoped.cpp
  test_iostream.cpp
  test_kwargs_and_defaults.cpp
  test_local_bindings.cpp
  test_methods_and_attributes.cpp
  test_modules.cpp
  test_multiple_inheritance.cpp
  test_numpy_array.cpp
  test_numpy_dtypes.cpp
  test_numpy_vectorize.cpp
  test_opaque_types.cpp
  test_operator_overloading.cpp
  test_pickling.cpp
  test_pytypes.cpp
  test_sequences_and_iterators.cpp
  test_smart_ptr.cpp
  test_stl.cpp
  test_stl_binders.cpp
  test_tagbased_polymorphic.cpp
  test_union.cpp
  test_virtual_functions.cpp
)

# Invoking cmake with something like:
#     cmake -DPYBIND11_TEST_OVERRIDE="test_callbacks.cpp;test_picking.cpp" ..
# lets you override the tests that get compiled and run.  You can restore to all tests with:
#     cmake -DPYBIND11_TEST_OVERRIDE= ..
if (PYBIND11_TEST_OVERRIDE)
  set(PYBIND11_TEST_FILES ${PYBIND11_TEST_OVERRIDE})
endif()

# Skip test_async for Python < 3.5
list(FIND PYBIND11_TEST_FILES test_async.cpp PYBIND11_TEST_FILES_ASYNC_I)
if((PYBIND11_TEST_FILES_ASYNC_I GREATER -1) AND ("${PYTHON_VERSION_MAJOR}.${PYTHON_VERSION_MINOR}" VERSION_LESS 3.5))
  message(STATUS "Skipping test_async because Python version ${PYTHON_VERSION_MAJOR}.${PYTHON_VERSION_MINOR} < 3.5")
  list(REMOVE_AT PYBIND11_TEST_FILES ${PYBIND11_TEST_FILES_ASYNC_I})
endif()

string(REPLACE ".cpp" ".py" PYBIND11_PYTEST_FILES "${PYBIND11_TEST_FILES}")

# Contains the set of test files that require pybind11_cross_module_tests to be
# built; if none of these are built (i.e. because TEST_OVERRIDE is used and
# doesn't include them) the second module doesn't get built.
set(PYBIND11_CROSS_MODULE_TESTS
  test_exceptions.py
  test_local_bindings.py
  test_stl.py
  test_stl_binders.py
)

set(PYBIND11_CROSS_MODULE_GIL_TESTS
  test_gil_scoped.py
)

# Check if Eigen is available; if not, remove from PYBIND11_TEST_FILES (but
# keep it in PYBIND11_PYTEST_FILES, so that we get the "eigen is not installed"
# skip message).
list(FIND PYBIND11_TEST_FILES test_eigen.cpp PYBIND11_TEST_FILES_EIGEN_I)
if(PYBIND11_TEST_FILES_EIGEN_I GREATER -1)
  # Try loading via newer Eigen's Eigen3Config first (bypassing tools/FindEigen3.cmake).
  # Eigen 3.3.1+ exports a cmake 3.0+ target for handling dependency requirements, but also
  # produces a fatal error if loaded from a pre-3.0 cmake.
  if (NOT CMAKE_VERSION VERSION_LESS 3.0)
    find_package(Eigen3 3.2.7 QUIET CONFIG)
    if (EIGEN3_FOUND)
      if (EIGEN3_VERSION_STRING AND NOT EIGEN3_VERSION_STRING VERSION_LESS 3.3.1)
        set(PYBIND11_EIGEN_VIA_TARGET 1)
      endif()
    endif()
  endif()
  if (NOT EIGEN3_FOUND)
    # Couldn't load via target, so fall back to allowing module mode finding, which will pick up
    # tools/FindEigen3.cmake
    find_package(Eigen3 3.2.7 QUIET)
  endif()

  if(EIGEN3_FOUND)
    # Eigen 3.3.1+ cmake sets EIGEN3_VERSION_STRING (and hard codes the version when installed
    # rather than looking it up in the cmake script); older versions, and the
    # tools/FindEigen3.cmake, set EIGEN3_VERSION instead.
    if(NOT EIGEN3_VERSION AND EIGEN3_VERSION_STRING)
      set(EIGEN3_VERSION ${EIGEN3_VERSION_STRING})
    endif()
    message(STATUS "Building tests with Eigen v${EIGEN3_VERSION}")
  else()
    list(REMOVE_AT PYBIND11_TEST_FILES ${PYBIND11_TEST_FILES_EIGEN_I})
    message(STATUS "Building tests WITHOUT Eigen")
  endif()
endif()

# Optional dependency for some tests (boost::variant is only supported with version >= 1.56)
find_package(Boost 1.56)

# Compile with compiler warnings turned on
function(pybind11_enable_warnings target_name)
  if(MSVC)
    target_compile_options(${target_name} PRIVATE /W4)
  elseif(CMAKE_CXX_COMPILER_ID MATCHES "(GNU|Intel|Clang)")
      target_compile_options(${target_name} PRIVATE -Wall -Wextra -Wconversion -Wcast-qual -Wdeprecated)
  endif()

  if(PYBIND11_WERROR)
    if(MSVC)
      target_compile_options(${target_name} PRIVATE /WX)
    elseif(CMAKE_CXX_COMPILER_ID MATCHES "(GNU|Intel|Clang)")
      target_compile_options(${target_name} PRIVATE -Werror)
    endif()
  endif()
endfunction()

set(test_targets pybind11_tests)

# Build pybind11_cross_module_tests if any test_whatever.py are being built that require it
foreach(t ${PYBIND11_CROSS_MODULE_TESTS})
  list(FIND PYBIND11_PYTEST_FILES ${t} i)
  if (i GREATER -1)
    list(APPEND test_targets pybind11_cross_module_tests)
    break()
  endif()
endforeach()

foreach(t ${PYBIND11_CROSS_MODULE_GIL_TESTS})
  list(FIND PYBIND11_PYTEST_FILES ${t} i)
  if (i GREATER -1)
    list(APPEND test_targets cross_module_gil_utils)
    break()
  endif()
endforeach()

set(testdir ${CMAKE_CURRENT_SOURCE_DIR})
foreach(target ${test_targets})
  set(test_files ${PYBIND11_TEST_FILES})
  if(NOT target STREQUAL "pybind11_tests")
    set(test_files "")
  endif()

  # Create the binding library
  pybind11_add_module(${target} THIN_LTO ${target}.cpp ${test_files} ${PYBIND11_HEADERS})
  pybind11_enable_warnings(${target})

  if(MSVC)
    target_compile_options(${target} PRIVATE /utf-8)
  endif()

  if(EIGEN3_FOUND)
    if (PYBIND11_EIGEN_VIA_TARGET)
      target_link_libraries(${target} PRIVATE Eigen3::Eigen)
    else()
      target_include_directories(${target} PRIVATE ${EIGEN3_INCLUDE_DIR})
    endif()
    target_compile_definitions(${target} PRIVATE -DPYBIND11_TEST_EIGEN)
  endif()

  if(Boost_FOUND)
    target_include_directories(${target} PRIVATE ${Boost_INCLUDE_DIRS})
    target_compile_definitions(${target} PRIVATE -DPYBIND11_TEST_BOOST)
  endif()

  # Always write the output file directly into the 'tests' directory (even on MSVC)
  if(NOT CMAKE_LIBRARY_OUTPUT_DIRECTORY)
    set_target_properties(${target} PROPERTIES LIBRARY_OUTPUT_DIRECTORY ${testdir})
    foreach(config ${CMAKE_CONFIGURATION_TYPES})
      string(TOUPPER ${config} config)
      set_target_properties(${target} PROPERTIES LIBRARY_OUTPUT_DIRECTORY_${config} ${testdir})
    endforeach()
  endif()
endforeach()

# Make sure pytest is found or produce a fatal error
if(NOT PYBIND11_PYTEST_FOUND)
  execute_process(COMMAND ${PYTHON_EXECUTABLE} -c "import pytest; print(pytest.__version__)"
                  RESULT_VARIABLE pytest_not_found OUTPUT_VARIABLE pytest_version ERROR_QUIET)
  if(pytest_not_found)
    message(FATAL_ERROR "Running the tests requires pytest. Please install it manually"
                        " (try: ${PYTHON_EXECUTABLE} -m pip install pytest)")
  elseif(pytest_version VERSION_LESS 3.0)
    message(FATAL_ERROR "Running the tests requires pytest >= 3.0. Found: ${pytest_version}"
                        "Please update it (try: ${PYTHON_EXECUTABLE} -m pip install -U pytest)")
  endif()
  set(PYBIND11_PYTEST_FOUND TRUE CACHE INTERNAL "")
endif()

if(CMAKE_VERSION VERSION_LESS 3.2)
  set(PYBIND11_USES_TERMINAL "")
else()
  set(PYBIND11_USES_TERMINAL "USES_TERMINAL")
endif()

# A single command to compile and run the tests
add_custom_target(pytest COMMAND ${PYTHON_EXECUTABLE} -m pytest ${PYBIND11_PYTEST_FILES}
                  DEPENDS ${test_targets} WORKING_DIRECTORY ${testdir} ${PYBIND11_USES_TERMINAL})

if(PYBIND11_TEST_OVERRIDE)
  add_custom_command(TARGET pytest POST_BUILD
    COMMAND ${CMAKE_COMMAND} -E echo "Note: not all tests run: -DPYBIND11_TEST_OVERRIDE is in effect")
endif()

# Add a check target to run all the tests, starting with pytest (we add dependencies to this below)
add_custom_target(check DEPENDS pytest)

# The remaining tests only apply when being built as part of the pybind11 project, but not if the
# tests are being built independently.
if (NOT PROJECT_NAME STREQUAL "pybind11")
  return()
endif()

# Add a post-build comment to show the primary test suite .so size and, if a previous size, compare it:
add_custom_command(TARGET pybind11_tests POST_BUILD
  COMMAND ${PYTHON_EXECUTABLE} ${PROJECT_SOURCE_DIR}/tools/libsize.py
  $<TARGET_FILE:pybind11_tests> ${CMAKE_CURRENT_BINARY_DIR}/sosize-$<TARGET_FILE_NAME:pybind11_tests>.txt)

# Test embedding the interpreter. Provides the `cpptest` target.
add_subdirectory(test_embed)

# Test CMake build using functions and targets from subdirectory or installed location
add_subdirectory(test_cmake_build)
