# Supplementary material
Source: ML conference proceedings conference paper supplement (https://proceedings.neurips.cc/paper_files/paper/2021/hash/0e9b734aa25ca8096cb7b56dc0dd8929-Abstract.html)
Supplement: Supplementary file 1 [file 0e9b734aa25ca8096cb7b56dc0dd8929-Supplemental.zip › l2e/rai-python/pybind11/tests/pytest.ini]

[pytest]
minversion = 3.0
norecursedirs = test_cmake_build test_embed
addopts =
    # show summary of skipped tests
    -rs
    # capture only Python print and C++ py::print, but not C output (low-level Python errors)
    --capture=sys
filterwarnings =
    # make warnings into errors but ignore certain third-party extension issues
    error
    # importing scipy submodules on some version of Python
    ignore::ImportWarning
    # bogus numpy ABI warning (see numpy/#432)
    ignore:.*numpy.dtype size changed.*:RuntimeWarning
    ignore:.*numpy.ufunc size changed.*:RuntimeWarning
