# Supplementary material
Source: ML conference proceedings conference paper supplement (https://proceedings.neurips.cc/paper_files/paper/2021/hash/0e9b734aa25ca8096cb7b56dc0dd8929-Abstract.html)
Supplement: Supplementary file 1 [file 0e9b734aa25ca8096cb7b56dc0dd8929-Supplemental.zip › l2e/rai-python/pybind11/tests/test_pickling.cpp]

/*
    tests/test_pickling.cpp -- pickle support

    Copyright (c) 2016 Wenzel Jakob <wenzel.jakob@epfl.ch>

    All rights reserved. Use of this source code is governed by a
    BSD-style license that can be found in the LICENSE file.
*/

#include "pybind11_tests.h"

TEST_SUBMODULE(pickling, m) {
    // test_roundtrip
    class Pickleable {
    public:
        Pickleable(const std::string &value) : m_value(value) { }
        const std::string &value() const { return m_value; }

        void setExtra1(int extra1) { m_extra1 = extra1; }
        void setExtra2(int extra2) { m_extra2 = extra2; }
        int extra1() const { return m_extra1; }
        int extra2() const { return m_extra2; }
    private:
        std::string m_value;
        int m_extra1 = 0;
        int m_extra2 = 0;
    };

    class PickleableNew : public Pickleable {
    public:
        using Pickleable::Pickleable;
    };

    py::class_<Pickleable>(m, "Pickleable")
        .def(py::init<std::string>())
        .def("value", &Pickleable::value)
        .def("extra1", &Pickleable::extra1)
        .def("extra2", &Pickleable::extra2)
        .def("setExtra1", &Pickleable::setExtra1)
        .def("setExtra2", &Pickleable::setExtra2)
        // For details on the methods below, refer to
        // http://docs.python.org/3/library/pickle.html#pickling-class-instances
        .def("__getstate__", [](const Pickleable &p) {
            /* Return a tuple that fully encodes the state of the object */
            return py::make_tuple(p.value(), p.extra1(), p.extra2());
        })
        .def("__setstate__", [](Pickleable &p, py::tuple t) {
            if (t.size() != 3)
                throw std::runtime_error("Invalid state!");
            /* Invoke the constructor (need to use in-place version) */
            new (&p) Pickleable(t[0].cast<std::string>());

            /* Assign any additional state */
            p.setExtra1(t[1].cast<int>());
            p.setExtra2(t[2].cast<int>());
        });

    py::class_<PickleableNew, Pickleable>(m, "PickleableNew")
        .def(py::init<std::string>())
        .def(py::pickle(
            [](const PickleableNew &p) {
                return py::make_tuple(p.value(), p.extra1(), p.extra2());
            },
            [](py::tuple t) {
                if (t.size() != 3)
                    throw std::runtime_error("Invalid state!");
                auto p = PickleableNew(t[0].cast<std::string>());

                p.setExtra1(t[1].cast<int>());
                p.setExtra2(t[2].cast<int>());
                return p;
            }
        ));

#if !defined(PYPY_VERSION)
    // test_roundtrip_with_dict
    class PickleableWithDict {
    public:
        PickleableWithDict(const std::string &value) : value(value) { }

        std::string value;
        int extra;
    };

    class PickleableWithDictNew : public PickleableWithDict {
    public:
        using PickleableWithDict::PickleableWithDict;
    };

    py::class_<PickleableWithDict>(m, "PickleableWithDict", py::dynamic_attr())
        .def(py::init<std::string>())
        .def_readwrite("value", &PickleableWithDict::value)
        .def_readwrite("extra", &PickleableWithDict::extra)
        .def("__getstate__", [](py::object self) {
            /* Also include __dict__ in state */
            return py::make_tuple(self.attr("value"), self.attr("extra"), self.attr("__dict__"));
        })
        .def("__setstate__", [](py::object self, py::tuple t) {
            if (t.size() != 3)
                throw std::runtime_error("Invalid state!");
            /* Cast and construct */
            auto& p = self.cast<PickleableWithDict&>();
            new (&p) PickleableWithDict(t[0].cast<std::string>());

            /* Assign C++ state */
            p.extra = t[1].cast<int>();

            /* Assign Python state */
            self.attr("__dict__") = t[2];
        });

    py::class_<PickleableWithDictNew, PickleableWithDict>(m, "PickleableWithDictNew")
        .def(py::init<std::string>())
        .def(py::pickle(
            [](py::object self) {
                return py::make_tuple(self.attr("value"), self.attr("extra"), self.attr("__dict__"));
            },
            [](const py::tuple &t) {
                if (t.size() != 3)
                    throw std::runtime_error("Invalid state!");

                auto cpp_state = PickleableWithDictNew(t[0].cast<std::string>());
                cpp_state.extra = t[1].cast<int>();

                auto py_state = t[2].cast<py::dict>();
                return std::make_pair(cpp_state, py_state);
            }
        ));
#endif
}
