# Supplementary material
Source: ML conference proceedings conference paper supplement (https://proceedings.neurips.cc/paper_files/paper/2021/hash/0e9b734aa25ca8096cb7b56dc0dd8929-Abstract.html)
Supplement: Supplementary file 1 [file 0e9b734aa25ca8096cb7b56dc0dd8929-Supplemental.zip › l2e/rai-python/pybind11/tools/check-style.sh]

#!/bin/bash
#
# Script to check include/test code for common pybind11 code style errors.
#
# This script currently checks for
#
# 1. use of tabs instead of spaces
# 2. MSDOS-style CRLF endings
# 3. trailing spaces
# 4. missing space between keyword and parenthesis, e.g.: for(, if(, while(
# 5. Missing space between right parenthesis and brace, e.g. 'for (...){'
# 6. opening brace on its own line. It should always be on the same line as the
#    if/while/for/do statement.
#
# Invoke as: tools/check-style.sh
#

check_style_errors=0
IFS=$'\n'

found="$( GREP_COLORS='mt=41' GREP_COLOR='41' grep $'\t' include tests/*.{cpp,py,h} docs/*.rst -rn --color=always )"
if [ -n "$found" ]; then
    # The mt=41 sets a red background for matched tabs:
    echo -e '\033[31;01mError: found tab characters in the following files:\033[0m'
    check_style_errors=1
    echo "$found" | sed -e 's/^/    /'
fi


found="$( grep -IUlr $'\r' include tests/*.{cpp,py,h} docs/*.rst --color=always )"
if [ -n "$found" ]; then
    echo -e '\033[31;01mError: found CRLF characters in the following files:\033[0m'
    check_style_errors=1
    echo "$found" | sed -e 's/^/    /'
fi

found="$(GREP_COLORS='mt=41' GREP_COLOR='41' grep '[[:blank:]]\+$' include tests/*.{cpp,py,h} docs/*.rst -rn --color=always )"
if [ -n "$found" ]; then
    # The mt=41 sets a red background for matched trailing spaces
    echo -e '\033[31;01mError: found trailing spaces in the following files:\033[0m'
    check_style_errors=1
    echo "$found" | sed -e 's/^/    /'
fi

found="$(grep '\<\(if\|for\|while\|catch\)(\|){' include tests/*.{cpp,h} -rn --color=always)"
if [ -n "$found" ]; then
    echo -e '\033[31;01mError: found the following coding style problems:\033[0m'
    check_style_errors=1
    echo "$found" | sed -e 's/^/    /'
fi

found="$(awk '
function prefix(filename, lineno) {
    return "    \033[35m" filename "\033[36m:\033[32m" lineno "\033[36m:\033[0m"
}
function mark(pattern, string) { sub(pattern, "\033[01;31m&\033[0m", string); return string }
last && /^\s*{/ {
    print prefix(FILENAME, FNR-1) mark("\\)\\s*$", last)
    print prefix(FILENAME, FNR)   mark("^\\s*{", $0)
    last=""
}
{ last = /(if|for|while|catch|switch)\s*\(.*\)\s*$/ ? $0 : "" }
' $(find include -type f) tests/*.{cpp,h} docs/*.rst)"
if [ -n "$found" ]; then
    check_style_errors=1
    echo -e '\033[31;01mError: braces should occur on the same line as the if/while/.. statement. Found issues in the following files:\033[0m'
    echo "$found"
fi

exit $check_style_errors
