# Supplementary material
Source: ML conference proceedings conference paper supplement (https://proceedings.neurips.cc/paper_files/paper/2021/hash/0e9b734aa25ca8096cb7b56dc0dd8929-Abstract.html)
Supplement: Supplementary file 1 [file 0e9b734aa25ca8096cb7b56dc0dd8929-Supplemental.zip › l2e/rai-python/pybind11/tools/libsize.py]

from __future__ import print_function, division
import os
import sys

# Internal build script for generating debugging test .so size.
# Usage:
#     python libsize.py file.so save.txt -- displays the size of file.so and, if save.txt exists, compares it to the
#                                           size in it, then overwrites save.txt with the new size for future runs.

if len(sys.argv) != 3:
    sys.exit("Invalid arguments: usage: python libsize.py file.so save.txt")

lib = sys.argv[1]
save = sys.argv[2]

if not os.path.exists(lib):
    sys.exit("Error: requested file ({}) does not exist".format(lib))

libsize = os.path.getsize(lib)

print("------", os.path.basename(lib), "file size:", libsize, end='')

if os.path.exists(save):
    with open(save) as sf:
        oldsize = int(sf.readline())

    if oldsize > 0:
        change = libsize - oldsize
        if change == 0:
            print(" (no change)")
        else:
            print(" (change of {:+} bytes = {:+.2%})".format(change, change / oldsize))
else:
    print()

with open(save, 'w') as sf:
    sf.write(str(libsize))
