# Supplementary material
Source: ML conference proceedings conference paper supplement (https://proceedings.neurips.cc/paper_files/paper/2021/hash/0e9b734aa25ca8096cb7b56dc0dd8929-Abstract.html)
Supplement: Supplementary file 1 [file 0e9b734aa25ca8096cb7b56dc0dd8929-Supplemental.zip › l2e/rai-python/pybind11/tools/mkdoc.py]

#!/usr/bin/env python3
#
#  Syntax: mkdoc.py [-I<path> ..] [.. a list of header files ..]
#
#  Extract documentation from C++ header files to use it in Python bindings
#

import os
import sys
import platform
import re
import textwrap

from clang import cindex
from clang.cindex import CursorKind
from collections import OrderedDict
from glob import glob
from threading import Thread, Semaphore
from multiprocessing import cpu_count

RECURSE_LIST = [
    CursorKind.TRANSLATION_UNIT,
    CursorKind.NAMESPACE,
    CursorKind.CLASS_DECL,
    CursorKind.STRUCT_DECL,
    CursorKind.ENUM_DECL,
    CursorKind.CLASS_TEMPLATE
]

PRINT_LIST = [
    CursorKind.CLASS_DECL,
    CursorKind.STRUCT_DECL,
    CursorKind.ENUM_DECL,
    CursorKind.ENUM_CONSTANT_DECL,
    CursorKind.CLASS_TEMPLATE,
    CursorKind.FUNCTION_DECL,
    CursorKind.FUNCTION_TEMPLATE,
    CursorKind.CONVERSION_FUNCTION,
    CursorKind.CXX_METHOD,
    CursorKind.CONSTRUCTOR,
    CursorKind.FIELD_DECL
]

PREFIX_BLACKLIST = [
    CursorKind.TRANSLATION_UNIT
]

CPP_OPERATORS = {
    '<=': 'le', '>=': 'ge', '==': 'eq', '!=': 'ne', '[]': 'array',
    '+=': 'iadd', '-=': 'isub', '*=': 'imul', '/=': 'idiv', '%=':
    'imod', '&=': 'iand', '|=': 'ior', '^=': 'ixor', '<<=': 'ilshift',
    '>>=': 'irshift', '++': 'inc', '--': 'dec', '<<': 'lshift', '>>':
    'rshift', '&&': 'land', '||': 'lor', '!': 'lnot', '~': 'bnot',
    '&': 'band', '|': 'bor', '+': 'add', '-': 'sub', '*': 'mul', '/':
    'div', '%': 'mod', '<': 'lt', '>': 'gt', '=': 'assign', '()': 'call'
}

CPP_OPERATORS = OrderedDict(
    sorted(CPP_OPERATORS.items(), key=lambda t: -len(t[0])))

job_count = cpu_count()
job_semaphore = Semaphore(job_count)


class NoFilenamesError(ValueError):
    pass


def d(s):
    return s if isinstance(s, str) else s.decode('utf8')


def sanitize_name(name):
    name = re.sub(r'type-parameter-0-([0-9]+)', r'T\1', name)
    for k, v in CPP_OPERATORS.items():
        name = name.replace('operator%s' % k, 'operator_%s' % v)
    name = re.sub('<.*>', '', name)
    name = ''.join([ch if ch.isalnum() else '_' for ch in name])
    name = re.sub('_$', '', re.sub('_+', '_', name))
    return '__doc_' + name


def process_comment(comment):
    result = ''

    # Remove C++ comment syntax
    leading_spaces = float('inf')
    for s in comment.expandtabs(tabsize=4).splitlines():
        s = s.strip()
        if s.startswith('/*'):
            s = s[2:].lstrip('*')
        elif s.endswith('*/'):
            s = s[:-2].rstrip('*')
        elif s.startswith('///'):
            s = s[3:]
        if s.startswith('*'):
            s = s[1:]
        if len(s) > 0:
            leading_spaces = min(leading_spaces, len(s) - len(s.lstrip()))
        result += s + '\n'

    if leading_spaces != float('inf'):
        result2 = ""
        for s in result.splitlines():
            result2 += s[leading_spaces:] + '\n'
        result = result2

    # Doxygen tags
    cpp_group = '([\w:]+)'
    param_group = '([\[\w:\]]+)'

    s = result
    s = re.sub(r'\\c\s+%s' % cpp_group, r'``\1``', s)
    s = re.sub(r'\\a\s+%s' % cpp_group, r'*\1*', s)
    s = re.sub(r'\\e\s+%s' % cpp_group, r'*\1*', s)
    s = re.sub(r'\\em\s+%s' % cpp_group, r'*\1*', s)
    s = re.sub(r'\\b\s+%s' % cpp_group, r'**\1**', s)
    s = re.sub(r'\\ingroup\s+%s' % cpp_group, r'', s)
    s = re.sub(r'\\param%s?\s+%s' % (param_group, cpp_group),
               r'\n\n$Parameter ``\2``:\n\n', s)
    s = re.sub(r'\\tparam%s?\s+%s' % (param_group, cpp_group),
               r'\n\n$Template parameter ``\2``:\n\n', s)

    for in_, out_ in {
        'return': 'Returns',
        'author': 'Author',
        'authors': 'Authors',
        'copyright': 'Copyright',
        'date': 'Date',
        'remark': 'Remark',
        'sa': 'See also',
        'see': 'See also',
        'extends': 'Extends',
        'throw': 'Throws',
        'throws': 'Throws'
    }.items():
        s = re.sub(r'\\%s\s*' % in_, r'\n\n$%s:\n\n' % out_, s)

    s = re.sub(r'\\details\s*', r'\n\n', s)
    s = re.sub(r'\\brief\s*', r'', s)
    s = re.sub(r'\\short\s*', r'', s)
    s = re.sub(r'\\ref\s*', r'', s)

    s = re.sub(r'\\code\s?(.*?)\s?\\endcode',
               r"```\n\1\n```\n", s, flags=re.DOTALL)

    # HTML/TeX tags
    s = re.sub(r'<tt>(.*?)</tt>', r'``\1``', s, flags=re.DOTALL)
    s = re.sub(r'<pre>(.*?)</pre>', r"```\n\1\n```\n", s, flags=re.DOTALL)
    s = re.sub(r'<em>(.*?)</em>', r'*\1*', s, flags=re.DOTALL)
    s = re.sub(r'<b>(.*?)</b>', r'**\1**', s, flags=re.DOTALL)
    s = re.sub(r'\\f\$(.*?)\\f\$', r'$\1$', s, flags=re.DOTALL)
    s = re.sub(r'<li>', r'\n\n* ', s)
    s = re.sub(r'</?ul>', r'', s)
    s = re.sub(r'</li>', r'\n\n', s)

    s = s.replace('``true``', '``True``')
    s = s.replace('``false``', '``False``')

    # Re-flow text
    wrapper = textwrap.TextWrapper()
    wrapper.expand_tabs = True
    wrapper.replace_whitespace = True
    wrapper.drop_whitespace = True
    wrapper.width = 70
    wrapper.initial_indent = wrapper.subsequent_indent = ''

    result = ''
    in_code_segment = False
    for x in re.split(r'(```)', s):
        if x == '```':
            if not in_code_segment:
                result += '```\n'
            else:
                result += '\n```\n\n'
            in_code_segment = not in_code_segment
        elif in_code_segment:
            result += x.strip()
        else:
            for y in re.split(r'(?: *\n *){2,}', x):
                wrapped = wrapper.fill(re.sub(r'\s+', ' ', y).strip())
                if len(wrapped) > 0 and wrapped[0] == '$':
                    result += wrapped[1:] + '\n'
                    wrapper.initial_indent = \
                        wrapper.subsequent_indent = ' ' * 4
                else:
                    if len(wrapped) > 0:
                        result += wrapped + '\n\n'
                    wrapper.initial_indent = wrapper.subsequent_indent = ''
    return result.rstrip().lstrip('\n')


def extract(filename, node, prefix, output):
    if not (node.location.file is None or
            os.path.samefile(d(node.location.file.name), filename)):
        return 0
    if node.kind in RECURSE_LIST:
        sub_prefix = prefix
        if node.kind not in PREFIX_BLACKLIST:
            if len(sub_prefix) > 0:
                sub_prefix += '_'
            sub_prefix += d(node.spelling)
        for i in node.get_children():
            extract(filename, i, sub_prefix, output)
    if node.kind in PRINT_LIST:
        comment = d(node.raw_comment) if node.raw_comment is not None else ''
        comment = process_comment(comment)
        sub_prefix = prefix
        if len(sub_prefix) > 0:
            sub_prefix += '_'
        if len(node.spelling) > 0:
            name = sanitize_name(sub_prefix + d(node.spelling))
            output.append((name, filename, comment))


class ExtractionThread(Thread):
    def __init__(self, filename, parameters, output):
        Thread.__init__(self)
        self.filename = filename
        self.parameters = parameters
        self.output = output
        job_semaphore.acquire()

    def run(self):
        print('Processing "%s" ..' % self.filename, file=sys.stderr)
        try:
            index = cindex.Index(
                cindex.conf.lib.clang_createIndex(False, True))
            tu = index.parse(self.filename, self.parameters)
            extract(self.filename, tu.cursor, '', self.output)
        finally:
            job_semaphore.release()


def read_args(args):
    parameters = []
    filenames = []
    if "-x" not in args:
        parameters.extend(['-x', 'c++'])
    if not any(it.startswith("-std=") for it in args):
        parameters.append('-std=c++11')

    if platform.system() == 'Darwin':
        dev_path = '/Applications/Xcode.app/Contents/Developer/'
        lib_dir = dev_path + 'Toolchains/XcodeDefault.xctoolchain/usr/lib/'
        sdk_dir = dev_path + 'Platforms/MacOSX.platform/Developer/SDKs'
        libclang = lib_dir + 'libclang.dylib'

        if os.path.exists(libclang):
            cindex.Config.set_library_path(os.path.dirname(libclang))

        if os.path.exists(sdk_dir):
            sysroot_dir = os.path.join(sdk_dir, next(os.walk(sdk_dir))[1][0])
            parameters.append('-isysroot')
            parameters.append(sysroot_dir)
    elif platform.system() == 'Linux':
        # clang doesn't find its own base includes by default on Linux,
        # but different distros install them in different paths.
        # Try to autodetect, preferring the highest numbered version.
        def clang_folder_version(d):
            return [int(ver) for ver in re.findall(r'(?<!lib)(?<!\d)\d+', d)]
        clang_include_dir = max((
            path
            for libdir in ['lib64', 'lib', 'lib32']
            for path in glob('/usr/%s/clang/*/include' % libdir)
            if os.path.isdir(path)
        ), default=None, key=clang_folder_version)
        if clang_include_dir:
            parameters.extend(['-isystem', clang_include_dir])

    for item in args:
        if item.startswith('-'):
            parameters.append(item)
        else:
            filenames.append(item)

    if len(filenames) == 0:
        raise NoFilenamesError("args parameter did not contain any filenames")

    return parameters, filenames


def extract_all(args):
    parameters, filenames = read_args(args)
    output = []
    for filename in filenames:
        thr = ExtractionThread(filename, parameters, output)
        thr.start()

    print('Waiting for jobs to finish ..', file=sys.stderr)
    for i in range(job_count):
        job_semaphore.acquire()

    return output


def write_header(comments, out_file=sys.stdout):
    print('''/*
  This file contains docstrings for the Python bindings.
  Do not edit! These were automatically extracted by mkdoc.py
 */

#define __EXPAND(x)                                      x
#define __COUNT(_1, _2, _3, _4, _5, _6, _7, COUNT, ...)  COUNT
#define __VA_SIZE(...)                                   __EXPAND(__COUNT(__VA_ARGS__, 7, 6, 5, 4, 3, 2, 1))
#define __CAT1(a, b)                                     a ## b
#define __CAT2(a, b)                                     __CAT1(a, b)
#define __DOC1(n1)                                       __doc_##n1
#define __DOC2(n1, n2)                                   __doc_##n1##_##n2
#define __DOC3(n1, n2, n3)                               __doc_##n1##_##n2##_##n3
#define __DOC4(n1, n2, n3, n4)                           __doc_##n1##_##n2##_##n3##_##n4
#define __DOC5(n1, n2, n3, n4, n5)                       __doc_##n1##_##n2##_##n3##_##n4##_##n5
#define __DOC6(n1, n2, n3, n4, n5, n6)                   __doc_##n1##_##n2##_##n3##_##n4##_##n5##_##n6
#define __DOC7(n1, n2, n3, n4, n5, n6, n7)               __doc_##n1##_##n2##_##n3##_##n4##_##n5##_##n6##_##n7
#define DOC(...)                                         __EXPAND(__EXPAND(__CAT2(__DOC, __VA_SIZE(__VA_ARGS__)))(__VA_ARGS__))

#if defined(__GNUG__)
#pragma GCC diagnostic push
#pragma GCC diagnostic ignored "-Wunused-variable"
#endif
''', file=out_file)


    name_ctr = 1
    name_prev = None
    for name, _, comment in list(sorted(comments, key=lambda x: (x[0], x[1]))):
        if name == name_prev:
            name_ctr += 1
            name = name + "_%i" % name_ctr
        else:
            name_prev = name
            name_ctr = 1
        print('\nstatic const char *%s =%sR"doc(%s)doc";' %
              (name, '\n' if '\n' in comment else ' ', comment), file=out_file)

    print('''
#if defined(__GNUG__)
#pragma GCC diagnostic pop
#endif
''', file=out_file)


def mkdoc(args):
    args = list(args)
    out_path = None
    for idx, arg in enumerate(args):
        if arg.startswith("-o"):
            args.remove(arg)
            try:
                out_path = arg[2:] or args.pop(idx)
            except IndexError:
                print("-o flag requires an argument")
                exit(-1)
            break

    comments = extract_all(args)

    if out_path:
        try:
            with open(out_path, 'w') as out_file:
                write_header(comments, out_file)
        except:
            # In the event of an error, don't leave a partially-written
            # output file.
            try:
                os.unlink(out_path)
            except:
                pass
            raise
    else:
        write_header(comments)


if __name__ == '__main__':
    try:
        mkdoc(sys.argv[1:])
    except NoFilenamesError:
        print('Syntax: %s [.. a list of header files ..]' % sys.argv[0])
        exit(-1)
