# Supplementary material
Source: ML conference proceedings conference paper supplement (https://proceedings.neurips.cc/paper_files/paper/2021/hash/0e9b734aa25ca8096cb7b56dc0dd8929-Abstract.html)
Supplement: Supplementary file 1 [file 0e9b734aa25ca8096cb7b56dc0dd8929-Supplemental.zip › l2e/rai-python/pybind11/tools/pybind11Tools.cmake]

# tools/pybind11Tools.cmake -- Build system for the pybind11 modules
#
# Copyright (c) 2015 Wenzel Jakob <wenzel@inf.ethz.ch>
#
# All rights reserved. Use of this source code is governed by a
# BSD-style license that can be found in the LICENSE file.

cmake_minimum_required(VERSION 2.8.12)

# Add a CMake parameter for choosing a desired Python version
if(NOT PYBIND11_PYTHON_VERSION)
  set(PYBIND11_PYTHON_VERSION "" CACHE STRING "Python version to use for compiling modules")
endif()

set(Python_ADDITIONAL_VERSIONS 3.9 3.8 3.7 3.6 3.5 3.4)
find_package(PythonLibsNew ${PYBIND11_PYTHON_VERSION} REQUIRED)

include(CheckCXXCompilerFlag)
include(CMakeParseArguments)

if(NOT PYBIND11_CPP_STANDARD AND NOT CMAKE_CXX_STANDARD)
  if(NOT MSVC)
    check_cxx_compiler_flag("-std=c++14" HAS_CPP14_FLAG)

    if (HAS_CPP14_FLAG)
      set(PYBIND11_CPP_STANDARD -std=c++14)
    else()
      check_cxx_compiler_flag("-std=c++11" HAS_CPP11_FLAG)
      if (HAS_CPP11_FLAG)
        set(PYBIND11_CPP_STANDARD -std=c++11)
      else()
        message(FATAL_ERROR "Unsupported compiler -- pybind11 requires C++11 support!")
      endif()
    endif()
  elseif(MSVC)
    set(PYBIND11_CPP_STANDARD /std:c++14)
  endif()

  set(PYBIND11_CPP_STANDARD ${PYBIND11_CPP_STANDARD} CACHE STRING
      "C++ standard flag, e.g. -std=c++11, -std=c++14, /std:c++14.  Defaults to C++14 mode." FORCE)
endif()

# Checks whether the given CXX/linker flags can compile and link a cxx file.  cxxflags and
# linkerflags are lists of flags to use.  The result variable is a unique variable name for each set
# of flags: the compilation result will be cached base on the result variable.  If the flags work,
# sets them in cxxflags_out/linkerflags_out internal cache variables (in addition to ${result}).
function(_pybind11_return_if_cxx_and_linker_flags_work result cxxflags linkerflags cxxflags_out linkerflags_out)
  set(CMAKE_REQUIRED_LIBRARIES ${linkerflags})
  check_cxx_compiler_flag("${cxxflags}" ${result})
  if (${result})
    set(${cxxflags_out} "${cxxflags}" CACHE INTERNAL "" FORCE)
    set(${linkerflags_out} "${linkerflags}" CACHE INTERNAL "" FORCE)
  endif()
endfunction()

# Internal: find the appropriate link time optimization flags for this compiler
function(_pybind11_add_lto_flags target_name prefer_thin_lto)
  if (NOT DEFINED PYBIND11_LTO_CXX_FLAGS)
    set(PYBIND11_LTO_CXX_FLAGS "" CACHE INTERNAL "")
    set(PYBIND11_LTO_LINKER_FLAGS "" CACHE INTERNAL "")

    if(CMAKE_CXX_COMPILER_ID MATCHES "GNU|Clang")
      set(cxx_append "")
      set(linker_append "")
      if (CMAKE_CXX_COMPILER_ID MATCHES "Clang" AND NOT APPLE)
        # Clang Gold plugin does not support -Os; append -O3 to MinSizeRel builds to override it
        set(linker_append ";$<$<CONFIG:MinSizeRel>:-O3>")
      elseif(CMAKE_CXX_COMPILER_ID MATCHES "GNU")
        set(cxx_append ";-fno-fat-lto-objects")
      endif()

      if (CMAKE_CXX_COMPILER_ID MATCHES "Clang" AND prefer_thin_lto)
        _pybind11_return_if_cxx_and_linker_flags_work(HAS_FLTO_THIN
          "-flto=thin${cxx_append}" "-flto=thin${linker_append}"
          PYBIND11_LTO_CXX_FLAGS PYBIND11_LTO_LINKER_FLAGS)
      endif()

      if (NOT HAS_FLTO_THIN)
        _pybind11_return_if_cxx_and_linker_flags_work(HAS_FLTO
          "-flto${cxx_append}" "-flto${linker_append}"
          PYBIND11_LTO_CXX_FLAGS PYBIND11_LTO_LINKER_FLAGS)
      endif()
    elseif (CMAKE_CXX_COMPILER_ID MATCHES "Intel")
      # Intel equivalent to LTO is called IPO
      _pybind11_return_if_cxx_and_linker_flags_work(HAS_INTEL_IPO
      "-ipo" "-ipo" PYBIND11_LTO_CXX_FLAGS PYBIND11_LTO_LINKER_FLAGS)
    elseif(MSVC)
      # cmake only interprets libraries as linker flags when they start with a - (otherwise it
      # converts /LTCG to \LTCG as if it was a Windows path).  Luckily MSVC supports passing flags
      # with - instead of /, even if it is a bit non-standard:
      _pybind11_return_if_cxx_and_linker_flags_work(HAS_MSVC_GL_LTCG
        "/GL" "-LTCG" PYBIND11_LTO_CXX_FLAGS PYBIND11_LTO_LINKER_FLAGS)
    endif()

    if (PYBIND11_LTO_CXX_FLAGS)
      message(STATUS "LTO enabled")
    else()
      message(STATUS "LTO disabled (not supported by the compiler and/or linker)")
    endif()
  endif()

  # Enable LTO flags if found, except for Debug builds
  if (PYBIND11_LTO_CXX_FLAGS)
    target_compile_options(${target_name} PRIVATE "$<$<NOT:$<CONFIG:Debug>>:${PYBIND11_LTO_CXX_FLAGS}>")
  endif()
  if (PYBIND11_LTO_LINKER_FLAGS)
    target_link_libraries(${target_name} PRIVATE "$<$<NOT:$<CONFIG:Debug>>:${PYBIND11_LTO_LINKER_FLAGS}>")
  endif()
endfunction()

# Build a Python extension module:
# pybind11_add_module(<name> [MODULE | SHARED] [EXCLUDE_FROM_ALL]
#                     [NO_EXTRAS] [SYSTEM] [THIN_LTO] source1 [source2 ...])
#
function(pybind11_add_module target_name)
  set(options MODULE SHARED EXCLUDE_FROM_ALL NO_EXTRAS SYSTEM THIN_LTO)
  cmake_parse_arguments(ARG "${options}" "" "" ${ARGN})

  if(ARG_MODULE AND ARG_SHARED)
    message(FATAL_ERROR "Can't be both MODULE and SHARED")
  elseif(ARG_SHARED)
    set(lib_type SHARED)
  else()
    set(lib_type MODULE)
  endif()

  if(ARG_EXCLUDE_FROM_ALL)
    set(exclude_from_all EXCLUDE_FROM_ALL)
  endif()

  add_library(${target_name} ${lib_type} ${exclude_from_all} ${ARG_UNPARSED_ARGUMENTS})

  if(ARG_SYSTEM)
    set(inc_isystem SYSTEM)
  endif()

  target_include_directories(${target_name} ${inc_isystem}
    PRIVATE ${PYBIND11_INCLUDE_DIR}  # from project CMakeLists.txt
    PRIVATE ${pybind11_INCLUDE_DIR}  # from pybind11Config
    PRIVATE ${PYTHON_INCLUDE_DIRS})

  # Python debug libraries expose slightly different objects
  # https://docs.python.org/3.6/c-api/intro.html#debugging-builds
  # https://stackoverflow.com/questions/39161202/how-to-work-around-missing-pymodule-create2-in-amd64-win-python35-d-lib
  if(PYTHON_IS_DEBUG)
    target_compile_definitions(${target_name} PRIVATE Py_DEBUG)
  endif()

  # The prefix and extension are provided by FindPythonLibsNew.cmake
  set_target_properties(${target_name} PROPERTIES PREFIX "${PYTHON_MODULE_PREFIX}")
  set_target_properties(${target_name} PROPERTIES SUFFIX "${PYTHON_MODULE_EXTENSION}")

  # -fvisibility=hidden is required to allow multiple modules compiled against
  # different pybind versions to work properly, and for some features (e.g.
  # py::module_local).  We force it on everything inside the `pybind11`
  # namespace; also turning it on for a pybind module compilation here avoids
  # potential warnings or issues from having mixed hidden/non-hidden types.
  set_target_properties(${target_name} PROPERTIES CXX_VISIBILITY_PRESET "hidden")
  set_target_properties(${target_name} PROPERTIES CUDA_VISIBILITY_PRESET "hidden")

  if(WIN32 OR CYGWIN)
    # Link against the Python shared library on Windows
    target_link_libraries(${target_name} PRIVATE ${PYTHON_LIBRARIES})
  elseif(APPLE)
    # It's quite common to have multiple copies of the same Python version
    # installed on one's system. E.g.: one copy from the OS and another copy
    # that's statically linked into an application like Blender or Maya.
    # If we link our plugin library against the OS Python here and import it
    # into Blender or Maya later on, this will cause segfaults when multiple
    # conflicting Python instances are active at the same time (even when they
    # are of the same version).

    # Windows is not affected by this issue since it handles DLL imports
    # differently. The solution for Linux and Mac OS is simple: we just don't
    # link against the Python library. The resulting shared library will have
    # missing symbols, but that's perfectly fine -- they will be resolved at
    # import time.

    target_link_libraries(${target_name} PRIVATE "-undefined dynamic_lookup")

    if(ARG_SHARED)
      # Suppress CMake >= 3.0 warning for shared libraries
      set_target_properties(${target_name} PROPERTIES MACOSX_RPATH ON)
    endif()
  endif()

  # Make sure C++11/14 are enabled
  if(CMAKE_VERSION VERSION_LESS 3.3)
    target_compile_options(${target_name} PUBLIC ${PYBIND11_CPP_STANDARD})
  else()
    target_compile_options(${target_name} PUBLIC $<$<COMPILE_LANGUAGE:CXX>:${PYBIND11_CPP_STANDARD}>)
  endif()

  if(ARG_NO_EXTRAS)
    return()
  endif()

  _pybind11_add_lto_flags(${target_name} ${ARG_THIN_LTO})

  if (NOT MSVC AND NOT ${CMAKE_BUILD_TYPE} MATCHES Debug|RelWithDebInfo)
    # Strip unnecessary sections of the binary on Linux/Mac OS
    if(CMAKE_STRIP)
      if(APPLE)
        add_custom_command(TARGET ${target_name} POST_BUILD
                           COMMAND ${CMAKE_STRIP} -x $<TARGET_FILE:${target_name}>)
      else()
        add_custom_command(TARGET ${target_name} POST_BUILD
                           COMMAND ${CMAKE_STRIP} $<TARGET_FILE:${target_name}>)
      endif()
    endif()
  endif()

  if(MSVC)
    # /MP enables multithreaded builds (relevant when there are many files), /bigobj is
    # needed for bigger binding projects due to the limit to 64k addressable sections
    target_compile_options(${target_name} PRIVATE /bigobj)
    if(CMAKE_VERSION VERSION_LESS 3.11)
      target_compile_options(${target_name} PRIVATE $<$<NOT:$<CONFIG:Debug>>:/MP>)
    else()
      # Only set these options for C++ files.  This is important so that, for
      # instance, projects that include other types of source files like CUDA
      # .cu files don't get these options propagated to nvcc since that would
      # cause the build to fail.
      target_compile_options(${target_name} PRIVATE $<$<NOT:$<CONFIG:Debug>>:$<$<COMPILE_LANGUAGE:CXX>:/MP>>)
    endif()
  endif()
endfunction()
