# Supplementary material
Source: ML conference proceedings conference paper supplement (https://proceedings.neurips.cc/paper_files/paper/2021/hash/0e9b734aa25ca8096cb7b56dc0dd8929-Abstract.html)
Supplement: Supplementary file 1 [file 0e9b734aa25ca8096cb7b56dc0dd8929-Supplemental.zip › l2e/rai-python/pytest_tests/z.push.g]

floor	{ shape:ssBox, size:[1.5, 1.5, 0.1, 0.02], contact:-1 X:<[0, 0, 0.5, 1, 0, 0, 0]> }
box	{ shape:ssBox, size:[0.4, 0.4, 0.2, 0.05], contact:-1 X:<[0, 0, 0.65, 1, 0, 0, 0]> }
finger	{ shape:sphere, size:[0.06], contact:-1 X:<[0.9, 0, 0.9, 1, 0, 0, 0]> }
target	{ shape:ssBox, size:[0.4, 0.4, 0.2, 0.05], contact:-1 X:<[-0.5, -0.2, 0.65, 1, 0, 0, 0]> }
