# Supplementary material
Source: ML conference proceedings conference paper supplement (https://proceedings.neurips.cc/paper_files/paper/2021/hash/0e9b734aa25ca8096cb7b56dc0dd8929-Abstract.html)
Supplement: Supplementary file 1 [file 0e9b734aa25ca8096cb7b56dc0dd8929-Supplemental.zip › l2e/rai-python/setupPython.sh]

#/bin/sh

callpath=$(builtin cd "`dirname "${BASH_SOURCE[0]}"`" > /dev/null && pwd)

export PYTHONPATH="$PYTHONPATH:$callpath"

echo "new PYTHONPATH = " $PYTHONPATH
