# Supplementary material
Source: ML conference proceedings conference paper supplement (https://proceedings.neurips.cc/paper_files/paper/2021/hash/0e9b734aa25ca8096cb7b56dc0dd8929-Abstract.html)
Supplement: Supplementary file 1 [file 0e9b734aa25ca8096cb7b56dc0dd8929-Supplemental.zip › l2e/rai-python/test/kitchen.g]

frame floorwalls	{ }
frame table1	{ X=<T 2 0 0.385 0.707107 0 0 0.707107 > }
frame table2	{ X=<T -2 0 0.385 0.707107 0 0 0.707107 > }
frame sink1	{ X=<T -0.5 2 0.4 1 0 0 0 > }
frame stove1	{ X=<T 0.5 2 0.4 1 0 0 0 > }
frame _5(floorwalls)	{ shape=box size=[ 5 5 0.01 ] color=[ 0.82 0.7 0.55 ] Q=<T 0 0 -0.005 1 0 0 0 > }
frame _6(floorwalls)	{ shape=box size=[ 5 0.02 0.4 ] color=[ 0.82 0.7 0.55 ] Q=<T 0 -2.5 0.2 1 0 0 0 > }
frame _7(floorwalls)	{ shape=box size=[ 5 0.02 0.4 ] color=[ 0.82 0.7 0.55 ] Q=<T 0 2.5 0.2 1 0 0 0 > }
frame _8(floorwalls)	{ shape=box size=[ 0.02 5 0.4 ] color=[ 0.82 0.7 0.55 ] Q=<T 2.5 0 0.2 1 0 0 0 > }
frame _9(floorwalls)	{ shape=box size=[ 0.02 5 0.4 ] color=[ 0.82 0.7 0.55 ] Q=<T -2.5 0 0.2 1 0 0 0 > }
frame _10(table1)	{ shape=ssBox size=[ 1.503 0.61 0.77 .01 ] color=[ 0.75 0.75 0.75 ], contact }
frame _11(table2)	{ shape=ssBox size=[ 1.503 0.61 0.77 .01 ] color=[ 0.75 0.75 0.75 ], contact }
frame _12(sink1)	{ shape=ssBox size=[ 0.6 0.6 0.8 .01 ] color=[ 0.25 0.25 0.75 ], contact }
frame _13(stove1)	{ shape=ssBox size=[ 0.6 0.6 0.8 .01 ] color=[ 0.75 0.25 0.25 ], contact }
