# Supplementary material
Source: ML conference proceedings conference paper supplement (https://proceedings.neurips.cc/paper_files/paper/2021/hash/0e9b734aa25ca8096cb7b56dc0dd8929-Abstract.html)
Supplement: Supplementary file 1 [file 0e9b734aa25ca8096cb7b56dc0dd8929-Supplemental.zip › l2e/rai-python/test/rai.cfg]

#Hrate = 1e-0

#opt/constrainedMethod = 5
#opt/verbose = 2
#opt/muInit = 1.
#opt/aulaMuInc = 1.5
#opt/stopTolerance = 1e-3
#opt/stopGTolerance = 1e-3

useRos = 0

LGP/verbose=10
