# Supplementary material
Source: ML conference proceedings conference paper supplement (https://proceedings.neurips.cc/paper_files/paper/2021/hash/0e9b734aa25ca8096cb7b56dc0dd8929-Abstract.html)
Supplement: Supplementary file 1 [file 0e9b734aa25ca8096cb7b56dc0dd8929-Supplemental.zip › l2e/rai-python/test/retired/Makefile]

BASE = ../rai

DEPEND = KOMO Core Geo Kin Gui Optim ry LGP

PHYSX = 1

include $(BASE)/build/generic.mk
