# Supplementary material
Source: ML conference proceedings conference paper supplement (https://proceedings.neurips.cc/paper_files/paper/2021/hash/0e9b734aa25ca8096cb7b56dc0dd8929-Abstract.html)
Supplement: Supplementary file 1 [file 0e9b734aa25ca8096cb7b56dc0dd8929-Supplemental.zip › l2e/stable-baselines3/docs/conda_env.yml]

name: root
channels:
  - pytorch
  - defaults
dependencies:
  - cpuonly=1.0=0
  - pip=20.2
  - python=3.6
  - pytorch=1.5.0=py3.6_cpu_0
  - pip:
    - gym>=0.17.2
    - cloudpickle
    - opencv-python-headless
    - pandas
    - numpy
    - matplotlib
    - sphinx_autodoc_typehints
