# Supplementary material
Source: ML conference proceedings conference paper supplement (https://proceedings.neurips.cc/paper_files/paper/2021/hash/0e9b734aa25ca8096cb7b56dc0dd8929-Abstract.html)
Supplement: Supplementary file 1 [file 0e9b734aa25ca8096cb7b56dc0dd8929-Supplemental.zip › l2e/stable-baselines3/docs/conf.py]

# -*- coding: utf-8 -*-
#
# Configuration file for the Sphinx documentation builder.
#
# This file does only contain a selection of the most common options. For a
# full list see the documentation:
# http://www.sphinx-doc.org/en/master/config

# -- Path setup --------------------------------------------------------------

# If extensions (or modules to document with autodoc) are in another directory,
# add these directories to sys.path here. If the directory is relative to the
# documentation root, use os.path.abspath to make it absolute, like shown here.
#
import os
import sys
from unittest.mock import MagicMock

# We CANNOT enable 'sphinxcontrib.spelling' because ReadTheDocs.org does not support
# PyEnchant.
try:
    import sphinxcontrib.spelling  # noqa: F401

    enable_spell_check = True
except ImportError:
    enable_spell_check = False

# source code directory, relative to this file, for sphinx-autobuild
sys.path.insert(0, os.path.abspath(".."))


class Mock(MagicMock):
    __subclasses__ = []

    @classmethod
    def __getattr__(cls, name):
        return MagicMock()


# Mock modules that requires C modules
# Note: because of that we cannot test examples using CI
# 'torch', 'torch.nn', 'torch.nn.functional',
# DO not mock modules for now, we will need to do that for read the docs later
MOCK_MODULES = []
sys.modules.update((mod_name, Mock()) for mod_name in MOCK_MODULES)

# Read version from file
version_file = os.path.join(os.path.dirname(__file__), "../stable_baselines3", "version.txt")
with open(version_file, "r") as file_handler:
    __version__ = file_handler.read().strip()

# -- Project information -----------------------------------------------------

project = "Stable Baselines3"
copyright = "2020, Stable Baselines3"
author = "Stable Baselines3 Contributors"

# The short X.Y version
version = "master (" + __version__ + " )"
# The full version, including alpha/beta/rc tags
release = __version__


# -- General configuration ---------------------------------------------------

# If your documentation needs a minimal Sphinx version, state it here.
#
# needs_sphinx = '1.0'

# Add any Sphinx extension module names here, as strings. They can be
# extensions coming with Sphinx (named 'sphinx.ext.*') or your custom
# ones.
extensions = [
    "sphinx.ext.autodoc",
    "sphinx_autodoc_typehints",
    "sphinx.ext.autosummary",
    "sphinx.ext.mathjax",
    "sphinx.ext.ifconfig",
    "sphinx.ext.viewcode",
    # 'sphinx.ext.intersphinx',
    # 'sphinx.ext.doctest'
]

if enable_spell_check:
    extensions.append("sphinxcontrib.spelling")

# Add any paths that contain templates here, relative to this directory.
templates_path = ["_templates"]

# The suffix(es) of source filenames.
# You can specify multiple suffix as a list of string:
#
# source_suffix = ['.rst', '.md']
source_suffix = ".rst"

# The master toctree document.
master_doc = "index"

# The language for content autogenerated by Sphinx. Refer to documentation
# for a list of supported languages.
#
# This is also used if you do content translation via gettext catalogs.
# Usually you set "language" from the command line for these cases.
language = None

# List of patterns, relative to source directory, that match files and
# directories to ignore when looking for source files.
# This pattern also affects html_static_path and html_extra_path .
exclude_patterns = ["_build", "Thumbs.db", ".DS_Store"]

# The name of the Pygments (syntax highlighting) style to use.
pygments_style = "sphinx"


# -- Options for HTML output -------------------------------------------------

# The theme to use for HTML and HTML Help pages.  See the documentation for
# a list of builtin themes.

# Fix for read the docs
on_rtd = os.environ.get("READTHEDOCS") == "True"
if on_rtd:
    html_theme = "default"
else:
    html_theme = "sphinx_rtd_theme"

html_logo = "_static/img/logo.png"


def setup(app):
    app.add_css_file("css/baselines_theme.css")


# Theme options are theme-specific and customize the look and feel of a theme
# further.  For a list of options available for each theme, see the
# documentation.
#
# html_theme_options = {}

# Add any paths that contain custom static files (such as style sheets) here,
# relative to this directory. They are copied after the builtin static files,
# so a file named "default.css" will overwrite the builtin "default.css".
html_static_path = ["_static"]

# Custom sidebar templates, must be a dictionary that maps document names
# to template names.
#
# The default sidebars (for documents that don't match any pattern) are
# defined by theme itself.  Builtin themes are using these templates by
# default: ``['localtoc.html', 'relations.html', 'sourcelink.html',
# 'searchbox.html']``.
#
# html_sidebars = {}


# -- Options for HTMLHelp output ---------------------------------------------

# Output file base name for HTML help builder.
htmlhelp_basename = "StableBaselines3doc"


# -- Options for LaTeX output ------------------------------------------------

latex_elements = {
    # The paper size ('letterpaper' or 'a4paper').
    #
    # 'papersize': 'letterpaper',
    # The font size ('10pt', '11pt' or '12pt').
    #
    # 'pointsize': '10pt',
    # Additional stuff for the LaTeX preamble.
    #
    # 'preamble': '',
    # Latex figure (float) alignment
    #
    # 'figure_align': 'htbp',
}

# Grouping the document tree into LaTeX files. List of tuples
# (source start file, target name, title,
#  author, documentclass [howto, manual, or own class]).
latex_documents = [
    (master_doc, "StableBaselines3.tex", "Stable Baselines3 Documentation", "Stable Baselines3 Contributors", "manual"),
]


# -- Options for manual page output ------------------------------------------

# One entry per manual page. List of tuples
# (source start file, name, description, authors, manual section).
man_pages = [(master_doc, "stablebaselines3", "Stable Baselines3 Documentation", [author], 1)]


# -- Options for Texinfo output ----------------------------------------------

# Grouping the document tree into Texinfo files. List of tuples
# (source start file, target name, title, author,
#  dir menu entry, description, category)
texinfo_documents = [
    (
        master_doc,
        "StableBaselines3",
        "Stable Baselines3 Documentation",
        author,
        "StableBaselines3",
        "One line description of project.",
        "Miscellaneous",
    ),
]


# -- Extension configuration -------------------------------------------------

# Example configuration for intersphinx: refer to the Python standard library.
# intersphinx_mapping = {
#     'python': ('https://docs.python.org/3/', None),
#     'numpy': ('http://docs.scipy.org/doc/numpy/', None),
#     'torch': ('http://pytorch.org/docs/master/', None),
# }
