# Supplementary material
Source: ML conference proceedings conference paper supplement (https://proceedings.neurips.cc/paper_files/paper/2021/hash/0e9b734aa25ca8096cb7b56dc0dd8929-Abstract.html)
Supplement: Supplementary file 1 [file 0e9b734aa25ca8096cb7b56dc0dd8929-Supplemental.zip › l2e/stable-baselines3/docs/README.md]

## Stable Baselines3 Documentation

This folder contains documentation for the RL baselines.


### Build the Documentation

#### Install Sphinx and Theme

```
pip install sphinx sphinx-autobuild sphinx-rtd-theme
```

#### Building the Docs

In the `docs/` folder:
```
make html
```

if you want to building each time a file is changed:

```
sphinx-autobuild . _build/html
```
