# Supplementary material
Source: ML conference proceedings conference paper supplement (https://proceedings.neurips.cc/paper_files/paper/2021/hash/0e9b734aa25ca8096cb7b56dc0dd8929-Abstract.html)
Supplement: Supplementary file 1 [file 0e9b734aa25ca8096cb7b56dc0dd8929-Supplemental.zip › l2e/stable-baselines3/docs/spelling_wordlist.txt]

py
env
atari
argparse
Argparse
TensorFlow
feedforward
envs
VecEnv
pretrain
petrained
tf
th
nn
np
str
mujoco
cpu
ndarray
ndarrays
timestep
timesteps
stepsize
dataset
adam
fn
normalisation
Kullback
Leibler
boolean
deserialized
pretrained
minibatch
subprocesses
ArgumentParser
Tensorflow
Gaussian
approximator
minibatches
hyperparameters
hyperparameter
vectorized
rl
colab
dataloader
npz
datasets
vf
logits
num
Utils
backpropagate
prepend
NaN
preprocessing
Cloudpickle
async
multiprocess
tensorflow
mlp
cnn
neglogp
tanh
coef
repo
Huber
params
ppo
arxiv
Arxiv
func
DQN
Uhlenbeck
Ornstein
multithread
cancelled
Tensorboard
parallelize
customising
serializable
Multiprocessed
cartpole
toolset
lstm
rescale
ffmpeg
avconv
unnormalized
Github
pre
preprocess
backend
attr
preprocess
Antonin
Raffin
araffin
Homebrew
Numpy
Theano
rollout
kfac
Piecewise
csv
nvidia
visdom
tensorboard
preprocessed
namespace
sklearn
GoalEnv
Torchy
pytorch
dicts
optimizers
Deprecations
forkserver
cuda
Polyak
gSDE
rollouts
