# Supplementary material
Source: ML conference proceedings conference paper supplement (https://proceedings.neurips.cc/paper_files/paper/2021/hash/0e9b734aa25ca8096cb7b56dc0dd8929-Abstract.html)
Supplement: Supplementary file 1 [file 0e9b734aa25ca8096cb7b56dc0dd8929-Supplemental.zip › l2e/stable-baselines3/scripts/build_docker.sh]

#!/bin/bash

CPU_PARENT=ubuntu:18.04
GPU_PARENT=nvidia/cuda:10.1-cudnn7-runtime-ubuntu18.04

TAG=stablebaselines/stable-baselines3
VERSION=$(cat ./stable_baselines3/version.txt)

if [[ ${USE_GPU} == "True" ]]; then
  PARENT=${GPU_PARENT}
  PYTORCH_DEPS="cudatoolkit=10.1"
else
  PARENT=${CPU_PARENT}
  PYTORCH_DEPS="cpuonly"
  TAG="${TAG}-cpu"
fi

echo "docker build --build-arg PARENT_IMAGE=${PARENT} --build-arg PYTORCH_DEPS=${PYTORCH_DEPS} -t ${TAG}:${VERSION} ."
docker build --build-arg PARENT_IMAGE=${PARENT} --build-arg PYTORCH_DEPS=${PYTORCH_DEPS} -t ${TAG}:${VERSION} .
docker tag ${TAG}:${VERSION} ${TAG}:latest

if [[ ${RELEASE} == "True" ]]; then
  docker push ${TAG}:${VERSION}
  docker push ${TAG}:latest
fi
