# Supplementary material
Source: ML conference proceedings conference paper supplement (https://proceedings.neurips.cc/paper_files/paper/2021/hash/0e9b734aa25ca8096cb7b56dc0dd8929-Abstract.html)
Supplement: Supplementary file 1 [file 0e9b734aa25ca8096cb7b56dc0dd8929-Supplemental.zip › l2e/stable-baselines3/scripts/run_docker_cpu.sh]

#!/bin/bash
# Launch an experiment using the docker cpu image

cmd_line="$@"

echo "Executing in the docker (cpu image):"
echo $cmd_line

docker run -it --rm --network host --ipc=host \
 --mount src=$(pwd),target=/root/code/stable-baselines3,type=bind stablebaselines/stable-baselines3-cpu:latest \
  bash -c "cd /root/code/stable-baselines3/ && $cmd_line"
