# Supplementary material
Source: ML conference proceedings conference paper supplement (https://proceedings.neurips.cc/paper_files/paper/2021/hash/0e9b734aa25ca8096cb7b56dc0dd8929-Abstract.html)
Supplement: Supplementary file 1 [file 0e9b734aa25ca8096cb7b56dc0dd8929-Supplemental.zip › l2e/stable-baselines3/stable_baselines3/__init__.py]

import os

from stable_baselines3.a2c import A2C
from stable_baselines3.ddpg import DDPG
from stable_baselines3.dqn import DQN
from stable_baselines3.her import HER
from stable_baselines3.ppo import PPO
from stable_baselines3.sac import SAC
from stable_baselines3.td3 import TD3

# Read version from file
version_file = os.path.join(os.path.dirname(__file__), "version.txt")
with open(version_file, "r") as file_handler:
    __version__ = file_handler.read().strip()
